# Supplementary material for: C(sp 2 )–H selenylation of substituted benzo[4,5]imidazo[2,1- b ]thiazoles using phenyliodine( iii )bis(trifluoroacetate) as a mediator
Source: Royal Society of Chemistry journal article supplement (doi:10.1039/d4ra00057a), 2024-01-01

## *Supporting Information-*

### **C(sp<sup>2</sup>)-H selenylation of substituted benzo[4,5]imidazo[2,1-*b*]thiazoles using PIFA [Bis(trifluoroacetoxy)iodobenzene] as a mediator**

Prasanjit Ghosh,<sup>\*a</sup> Gautam Chhetri,<sup>a</sup> Anirban Mandal,<sup>a</sup> Yu Chen<sup>b,c</sup> William H.Hersh<sup>b,c</sup> and Sajal Das<sup>\*a</sup>

<sup>a</sup>Department of Chemistry, University of North Bengal, India, 734013

<sup>b</sup>Department of Chemistry and Biochemistry, Queens College and the Graduate Center of the City University of New York, Flushing, New York 11367-1597, United States

<sup>c</sup>Ph.D. Program in Chemistry, The Graduate Center of the City University of New York, Flushing, 365 Fifth Ave., New York, 10016, United States

E-mail: [prasanjitmeister@yahoo.com](mailto:prasanjitmeister@yahoo.com), [sajal.das@hotmail.com](mailto:sajal.das@hotmail.com) or [sajaldas@nbu.ac.in](mailto:sajaldas@nbu.ac.in)

**Table of Content****Page No.**

|                                        |         |
|----------------------------------------|---------|
| a) X-ray crystallographic studies..... | S2      |
| b) NMR Spectra of compounds.....       | S3- S64 |

### X-ray crystal structure of compound 5h

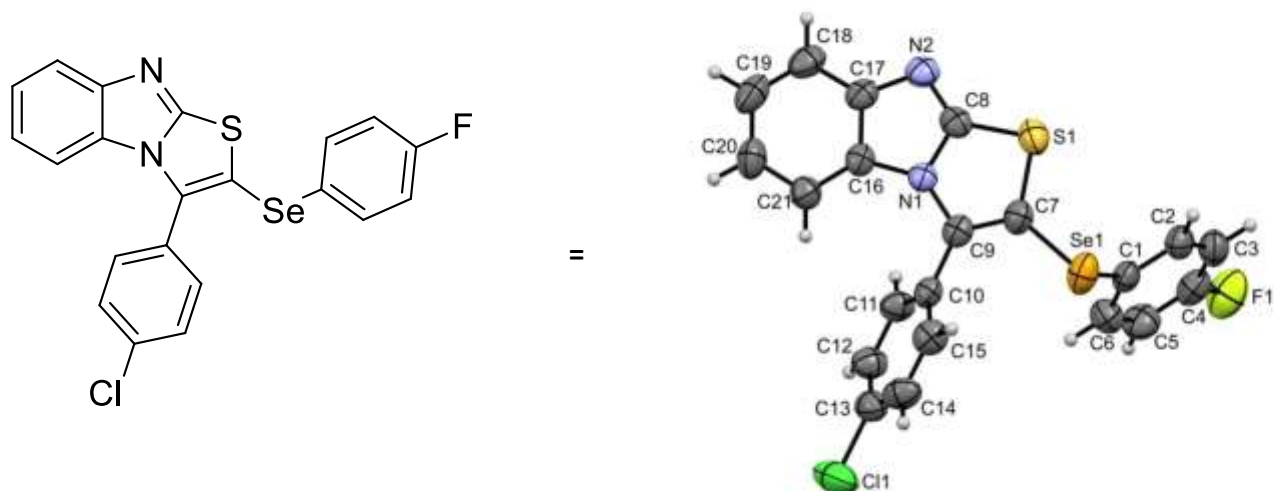

Figure : Mercury drawing of 5h.

|                                 |                                                       |                          |
|---------------------------------|-------------------------------------------------------|--------------------------|
| Formula                         | C <sub>21</sub> H <sub>12</sub> ClFN <sub>2</sub> SSe |                          |
| Crystal system                  | Triclinic                                             |                          |
| Space group                     | P -1                                                  |                          |
| Volume                          | 937(5)Å <sup>3</sup>                                  |                          |
| Z                               | 2                                                     |                          |
| Density (gcm <sup>-3</sup> )    | 1.623                                                 |                          |
| Theta range for data collection | 2.42° to 22.97°                                       |                          |
| Reflection collected/unique     | 10528/4102                                            |                          |
| Observed reflection[>2sigma(I)] | 2580                                                  |                          |
| Final R indices [I>2sigma(I)]   | R <sub>1</sub> = 0.0637                               | wR <sub>2</sub> = 0.0782 |
| R indices (all data)            | R <sub>1</sub> = 0.0332                               | wR <sub>2</sub> = 0.0713 |
| Unit cell dimension             | a = 9.2475(173)Å                                      | α = 70.528(22)°          |
|                                 | b = 9.9092(187)Å                                      | β = 67.961(21)°          |
|                                 | c = 11.8955(222)Å                                     | γ = 73.477(23)°          |

<sup>1</sup>H NMR spectra of 3a

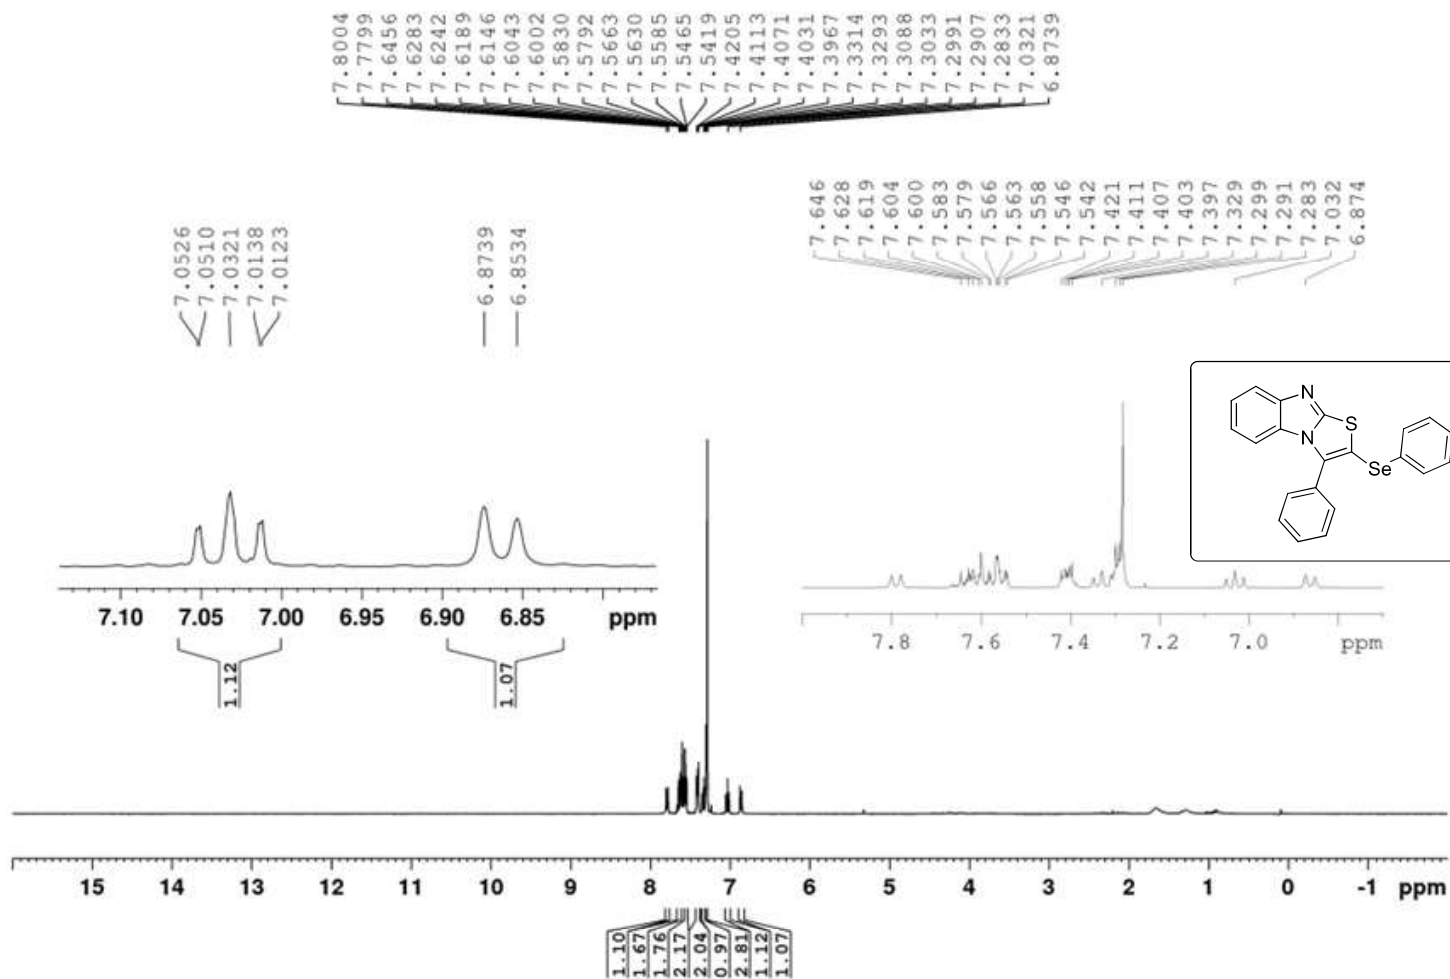

# <sup>13</sup>C NMR spectra of 3a

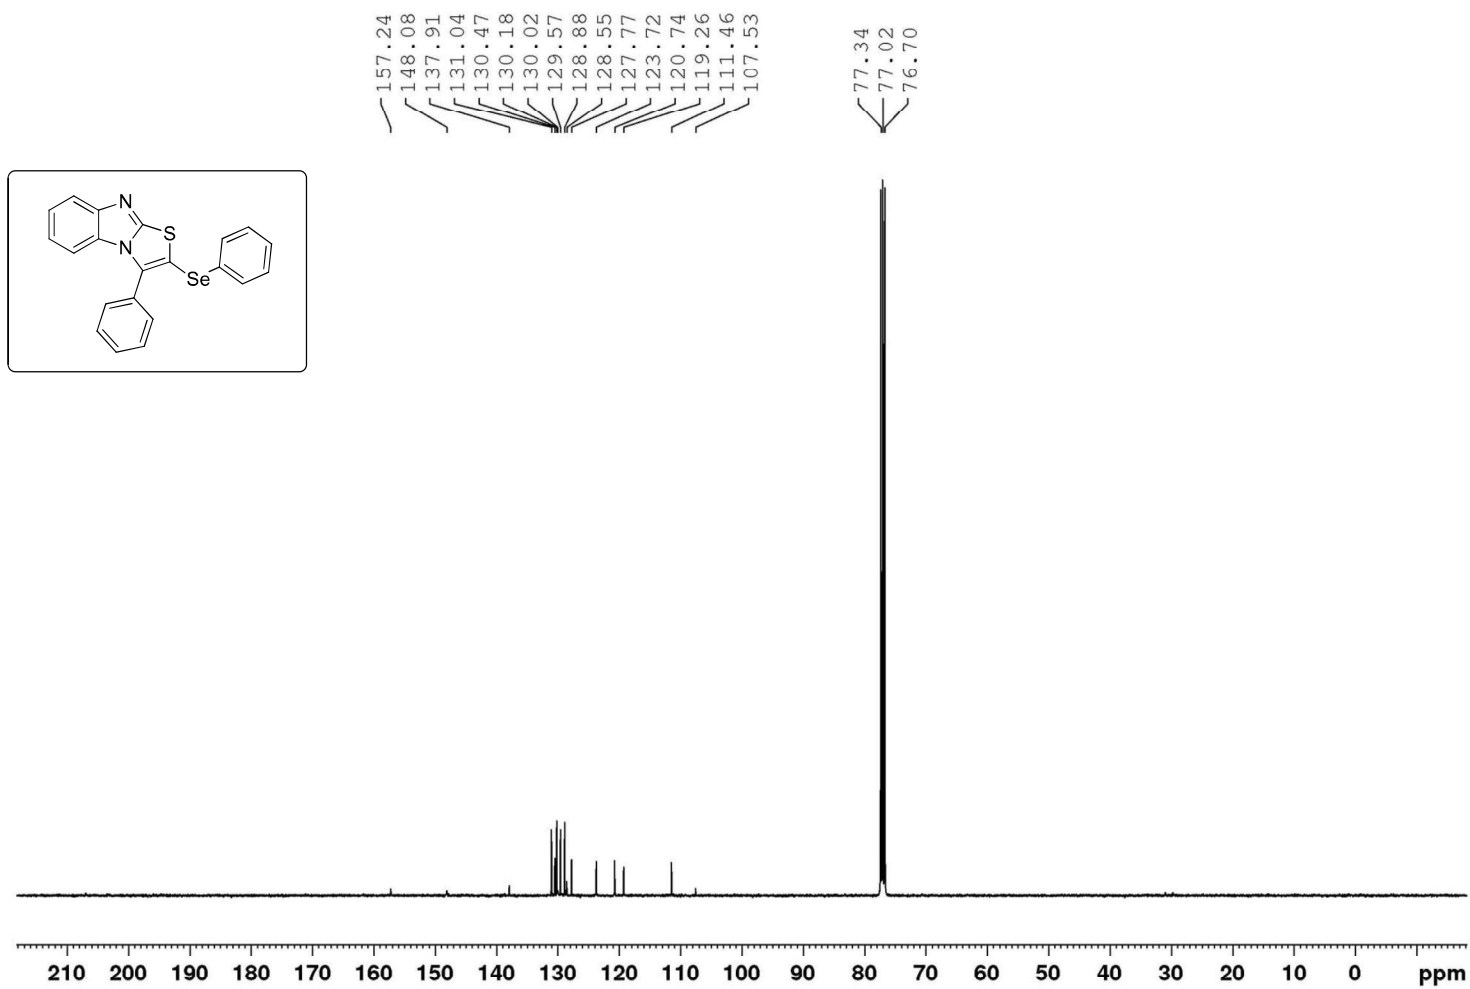

<sup>1</sup>H NMR spectra of 3b

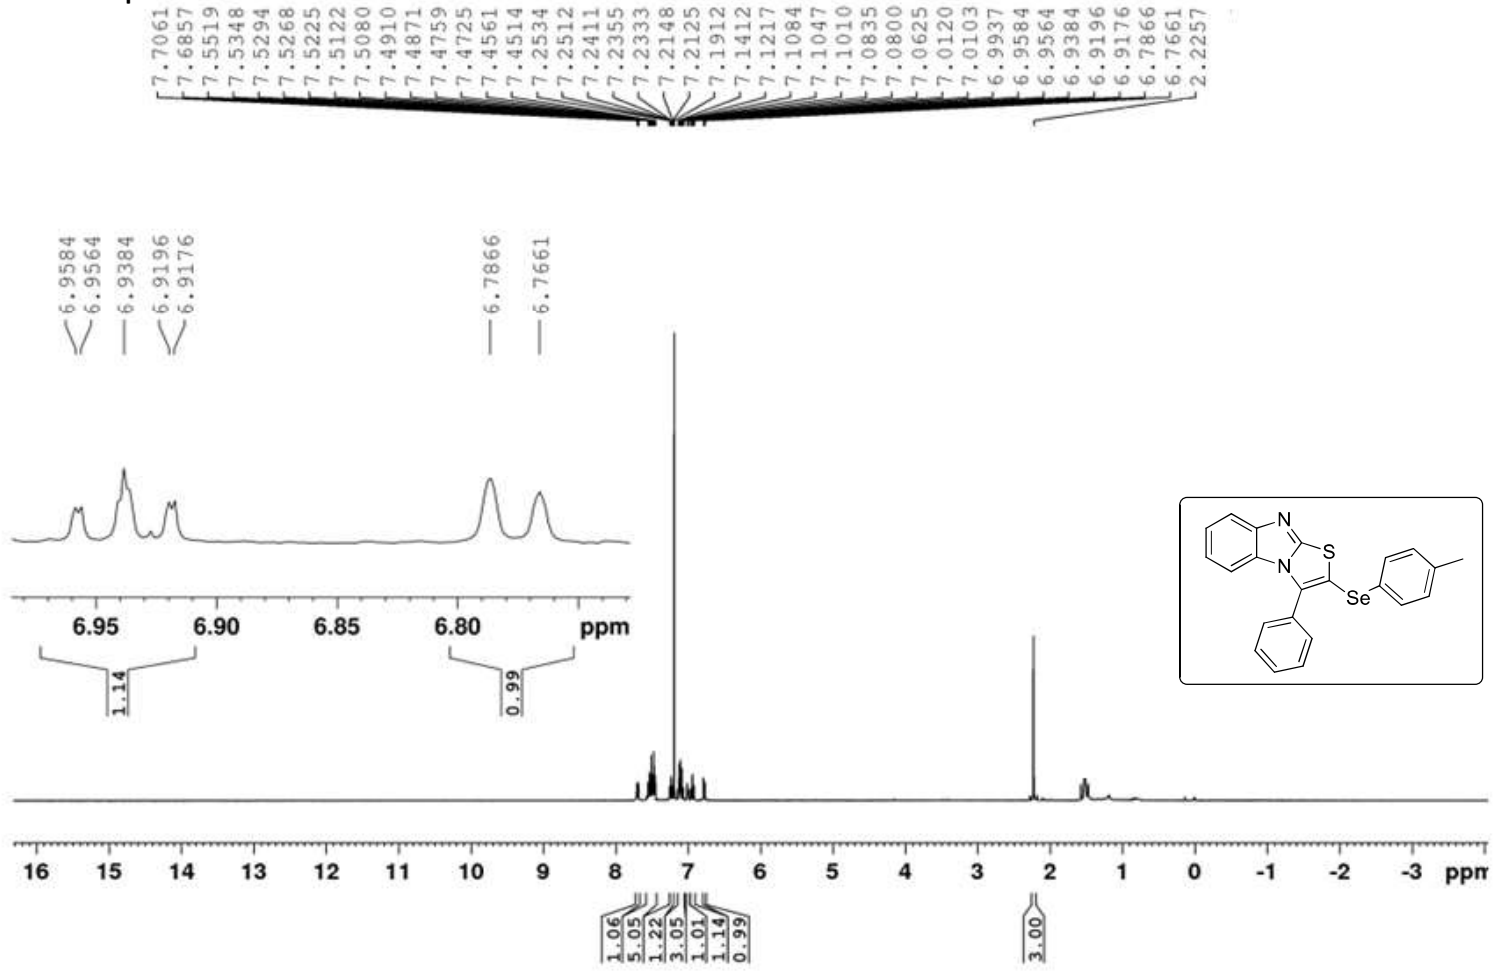

# $^{13}\text{C}$ NMR spectra of 3b

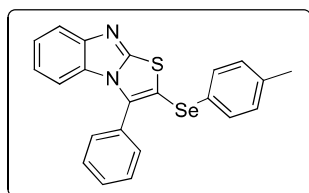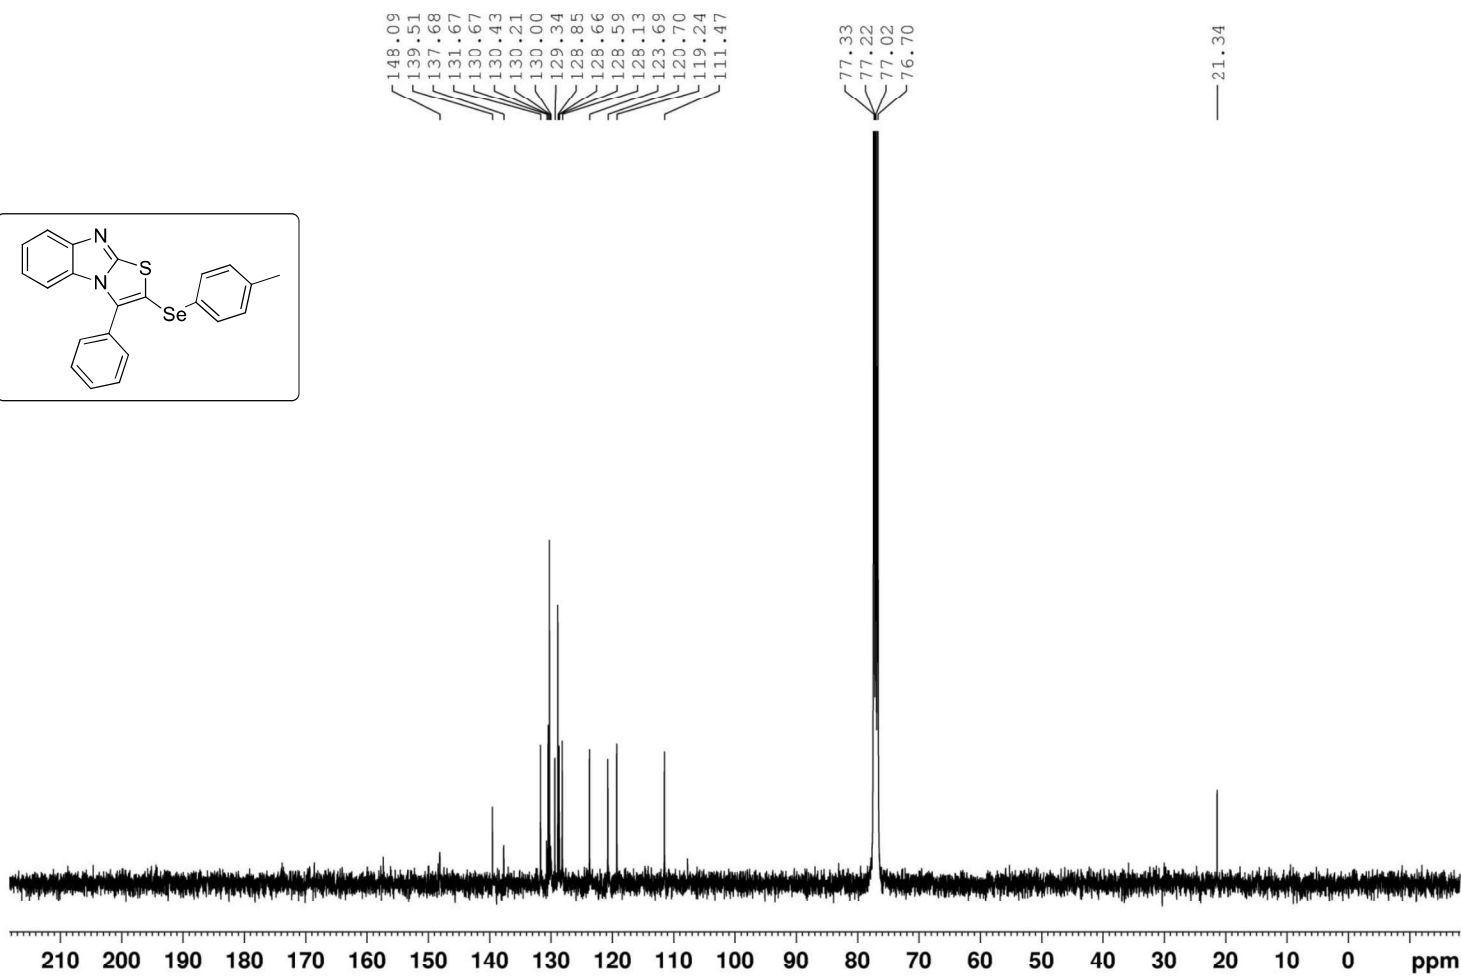

<sup>1</sup>H NMR spectra of 3c

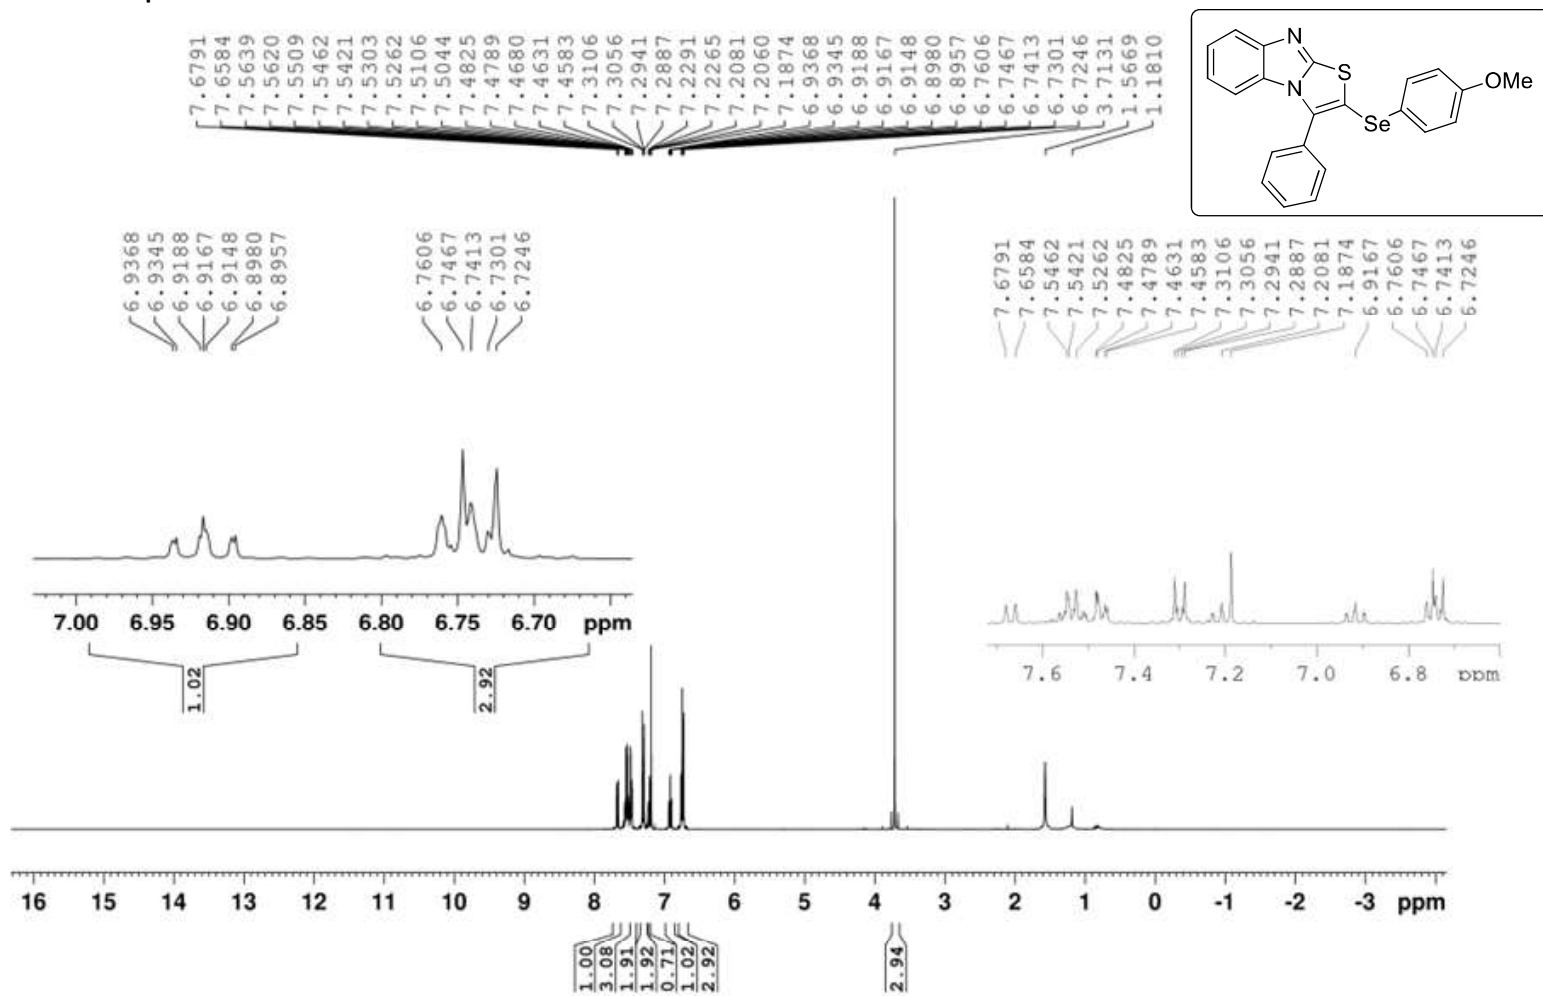



<sup>13</sup>C NMR spectra of 3c

160.03  
157.12  
148.02  
136.21  
134.69  
130.37  
130.32  
129.94  
128.87  
128.74  
123.54  
120.61  
120.27  
119.20  
115.21  
111.37  
109.56

77.34  
77.23  
77.02  
76.71

55.36

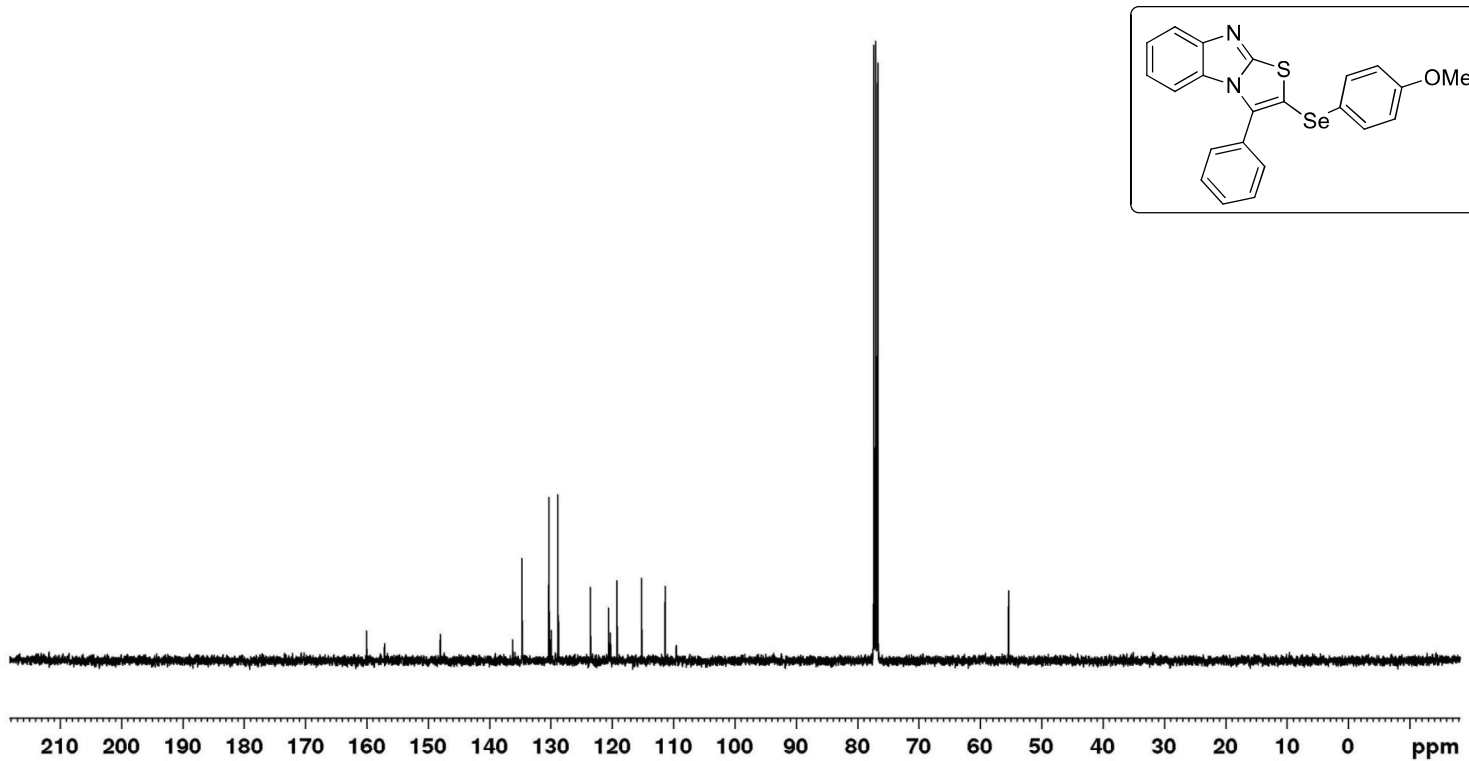

# <sup>1</sup>H NMR spectra of 3d

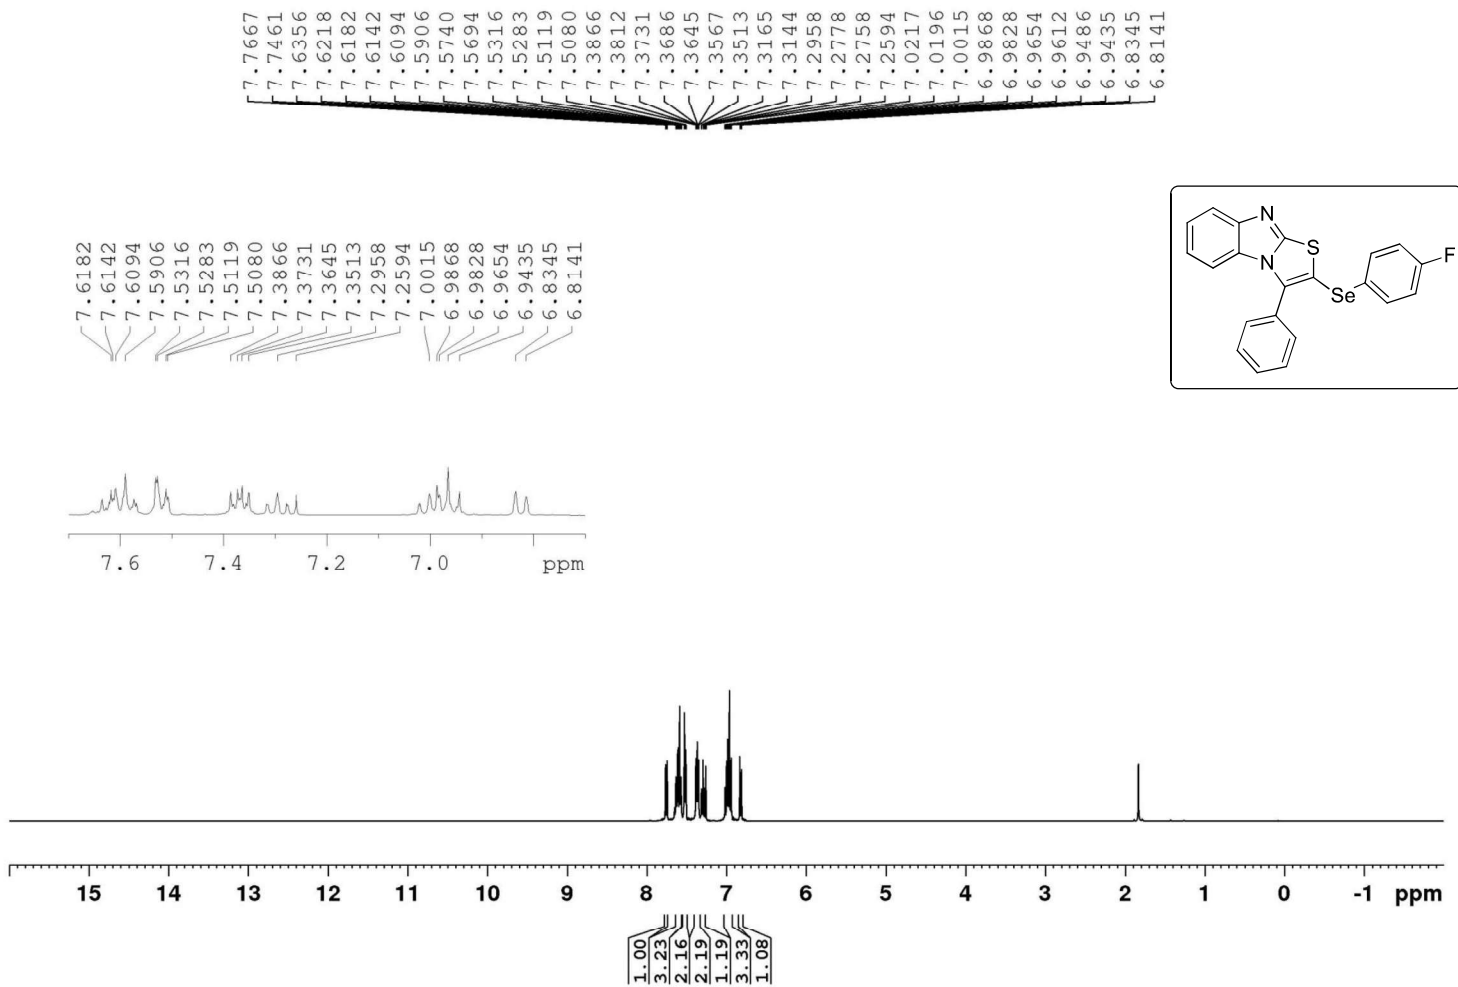

# <sup>13</sup>C NMR spectra of 3d

162.95  
160.48  
155.98  
147.06  
136.50  
132.96  
132.88  
129.51  
129.17  
128.94  
127.91  
127.47  
124.15  
124.12  
122.72  
119.75  
118.27  
115.86  
115.64  
110.39  
106.93  
76.35  
76.23  
76.03  
75.71

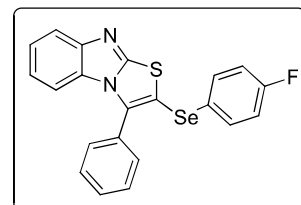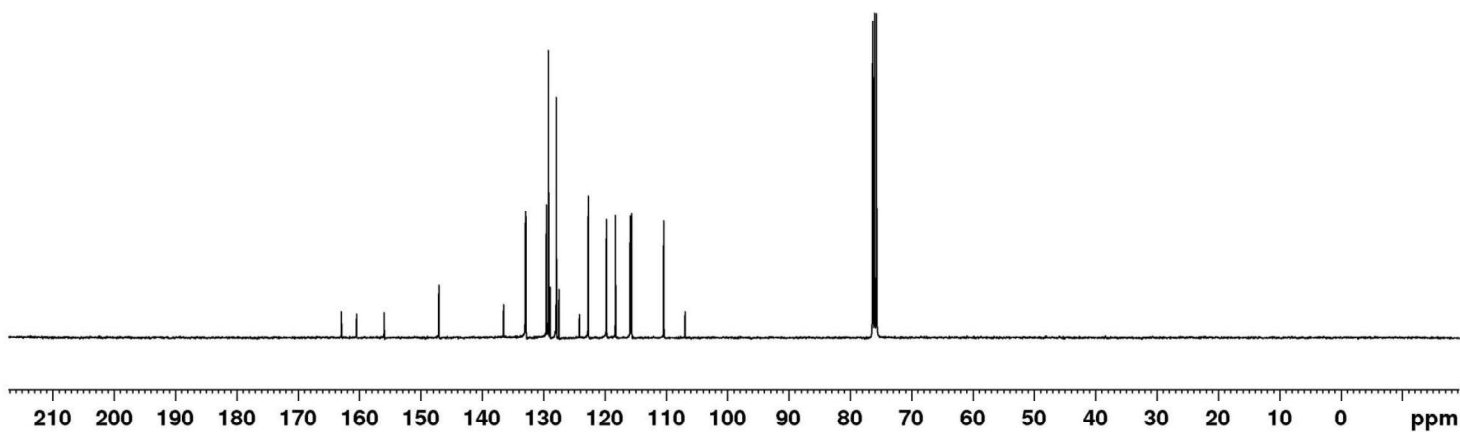

<sup>19</sup>F NMR spectra of 3d

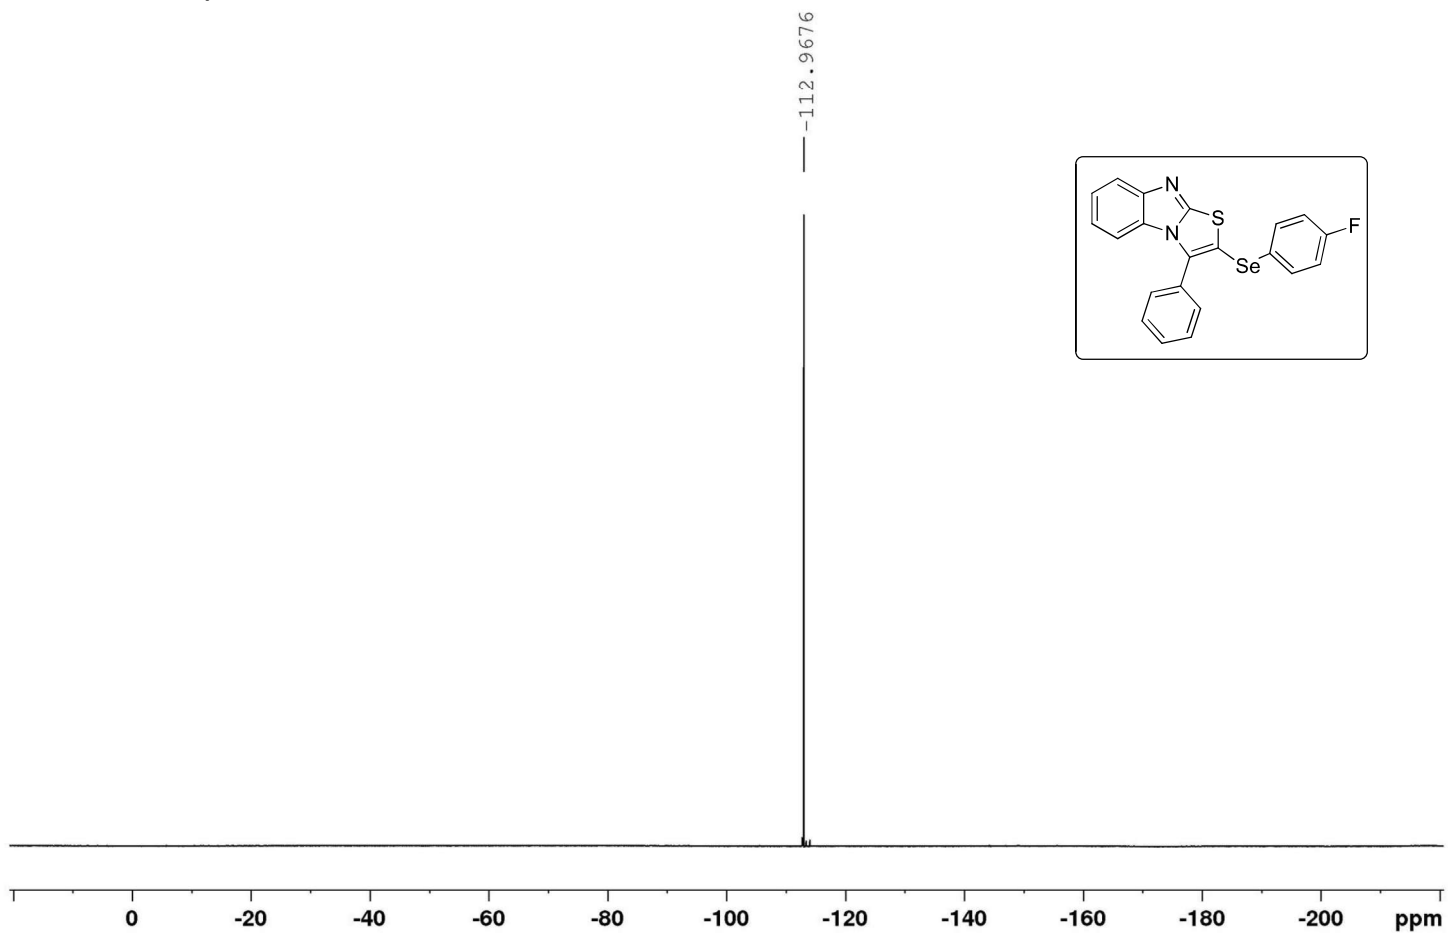

<sup>1</sup>H NMR spectra of 3e

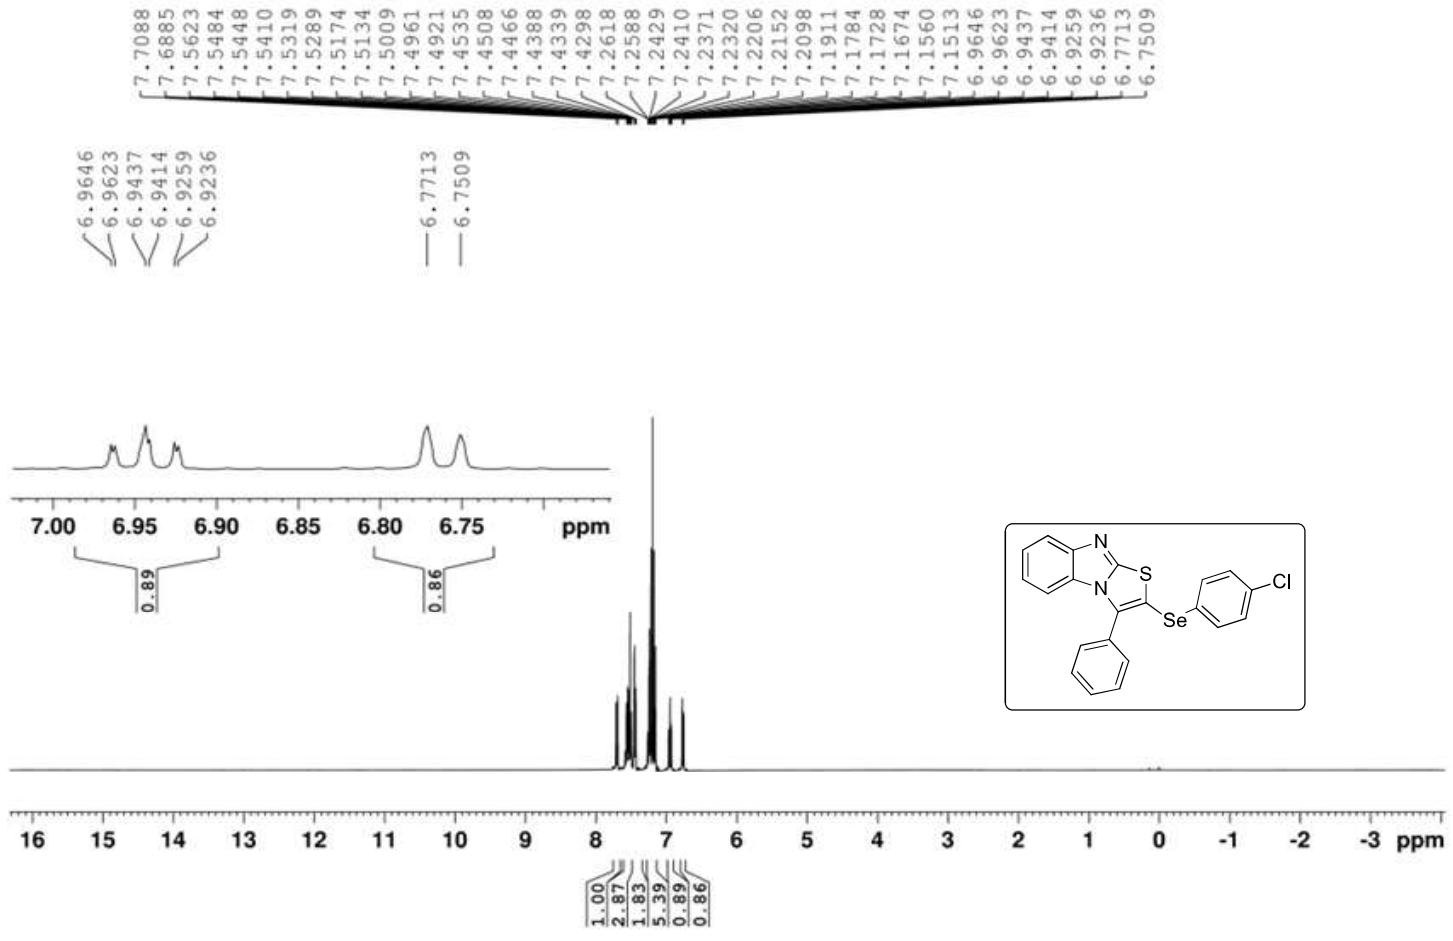

# <sup>13</sup>C NMR spectra of 3e

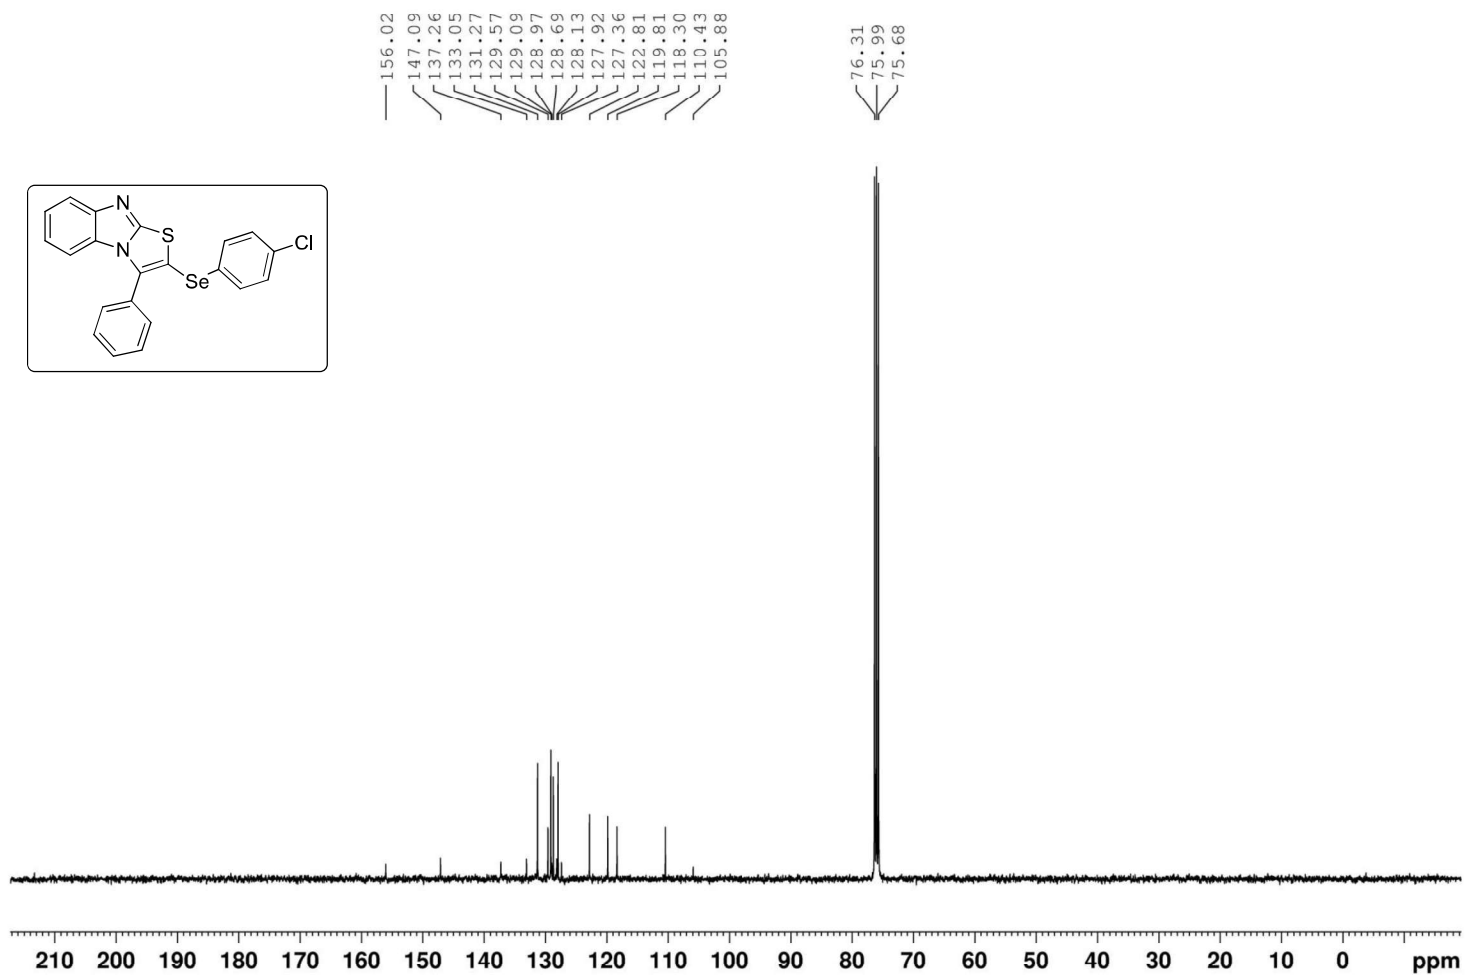

# <sup>1</sup>H NMR spectra of 3f

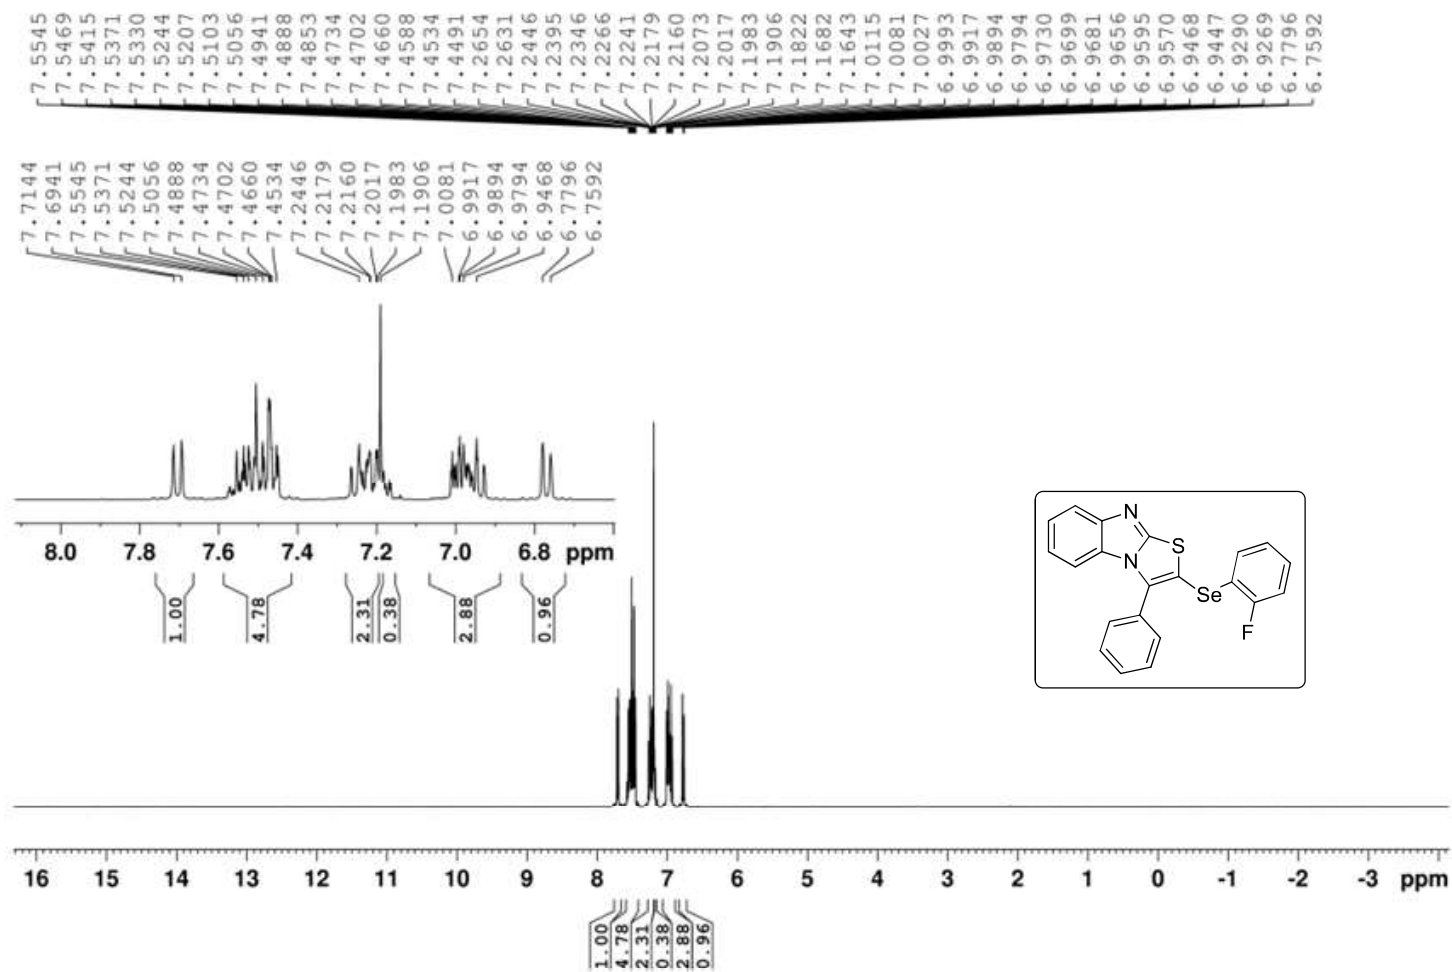

<sup>13</sup>C NMR spectra of 3f

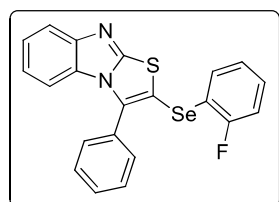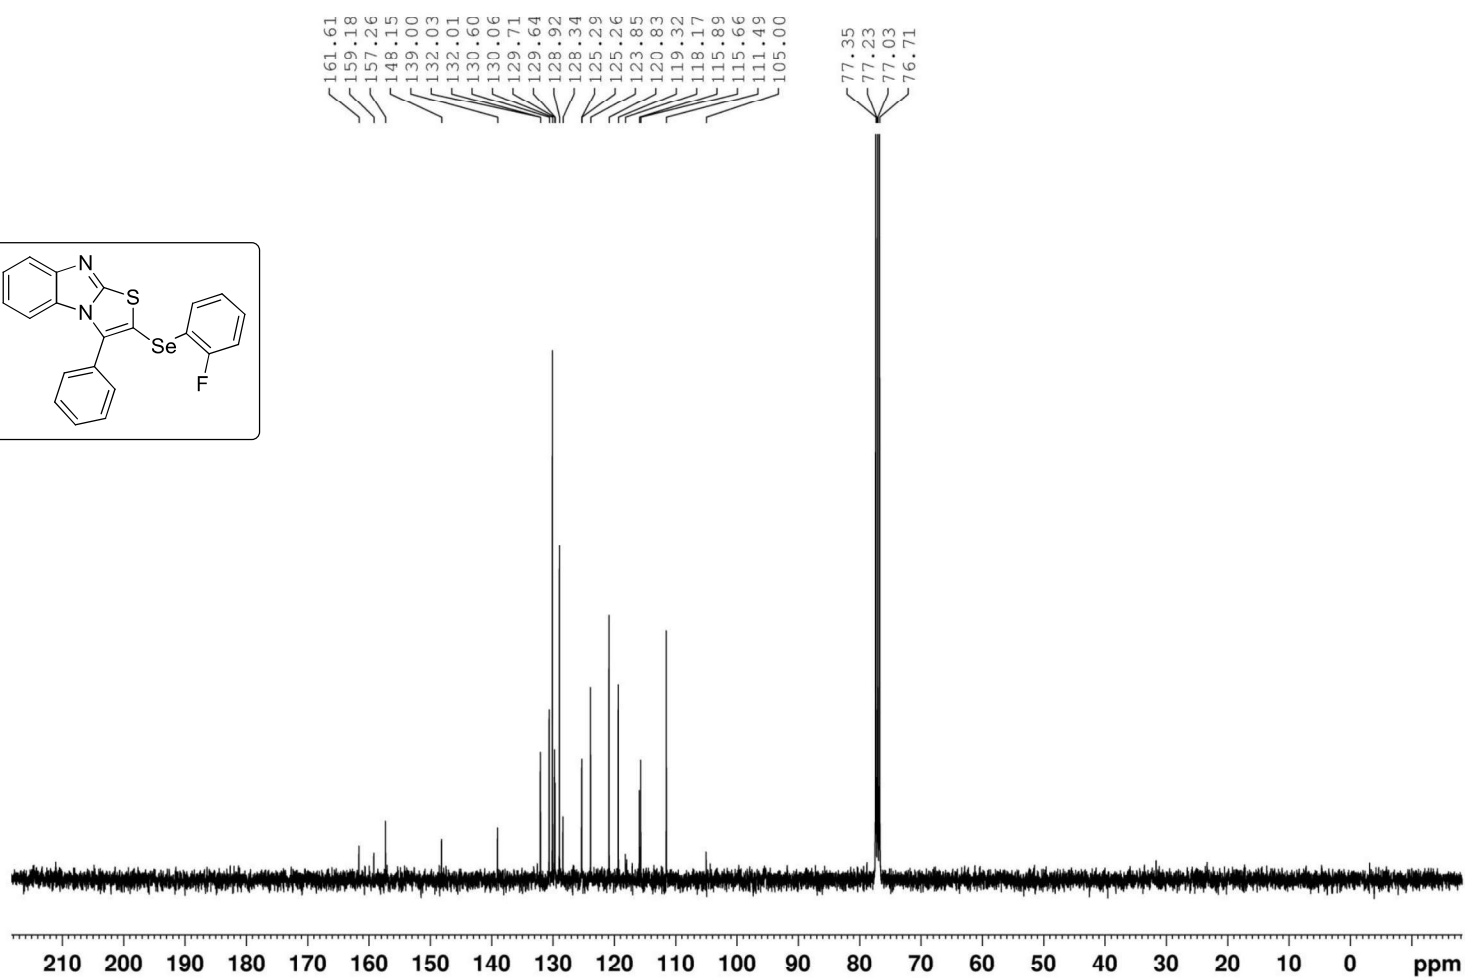



<sup>19</sup>F NMR spectra of 3f

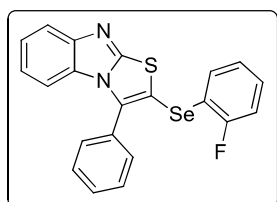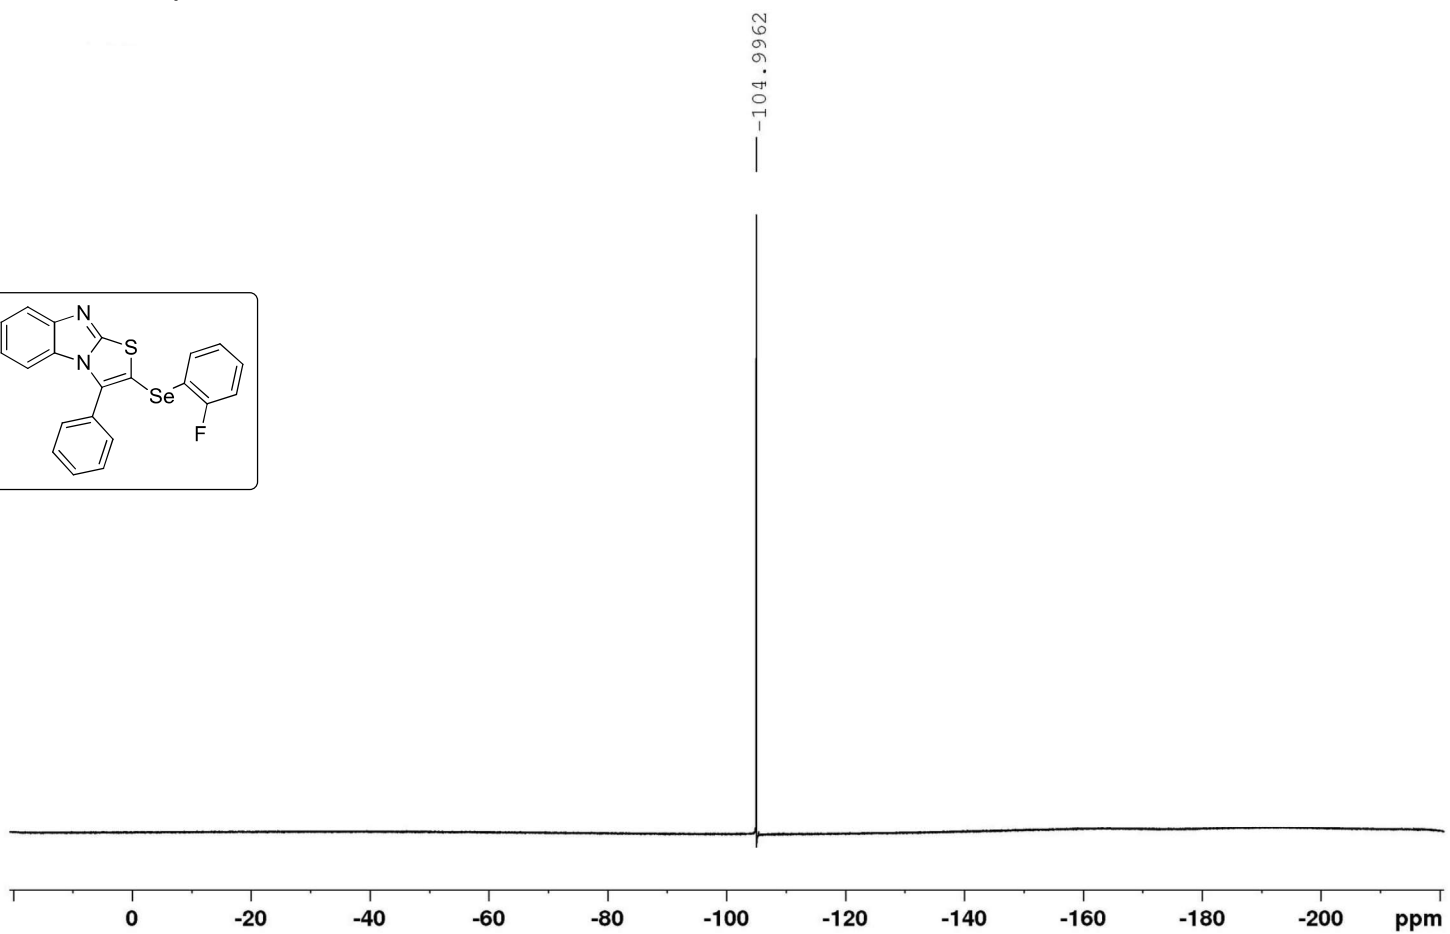

<sup>1</sup>H NMR spectra of 3h

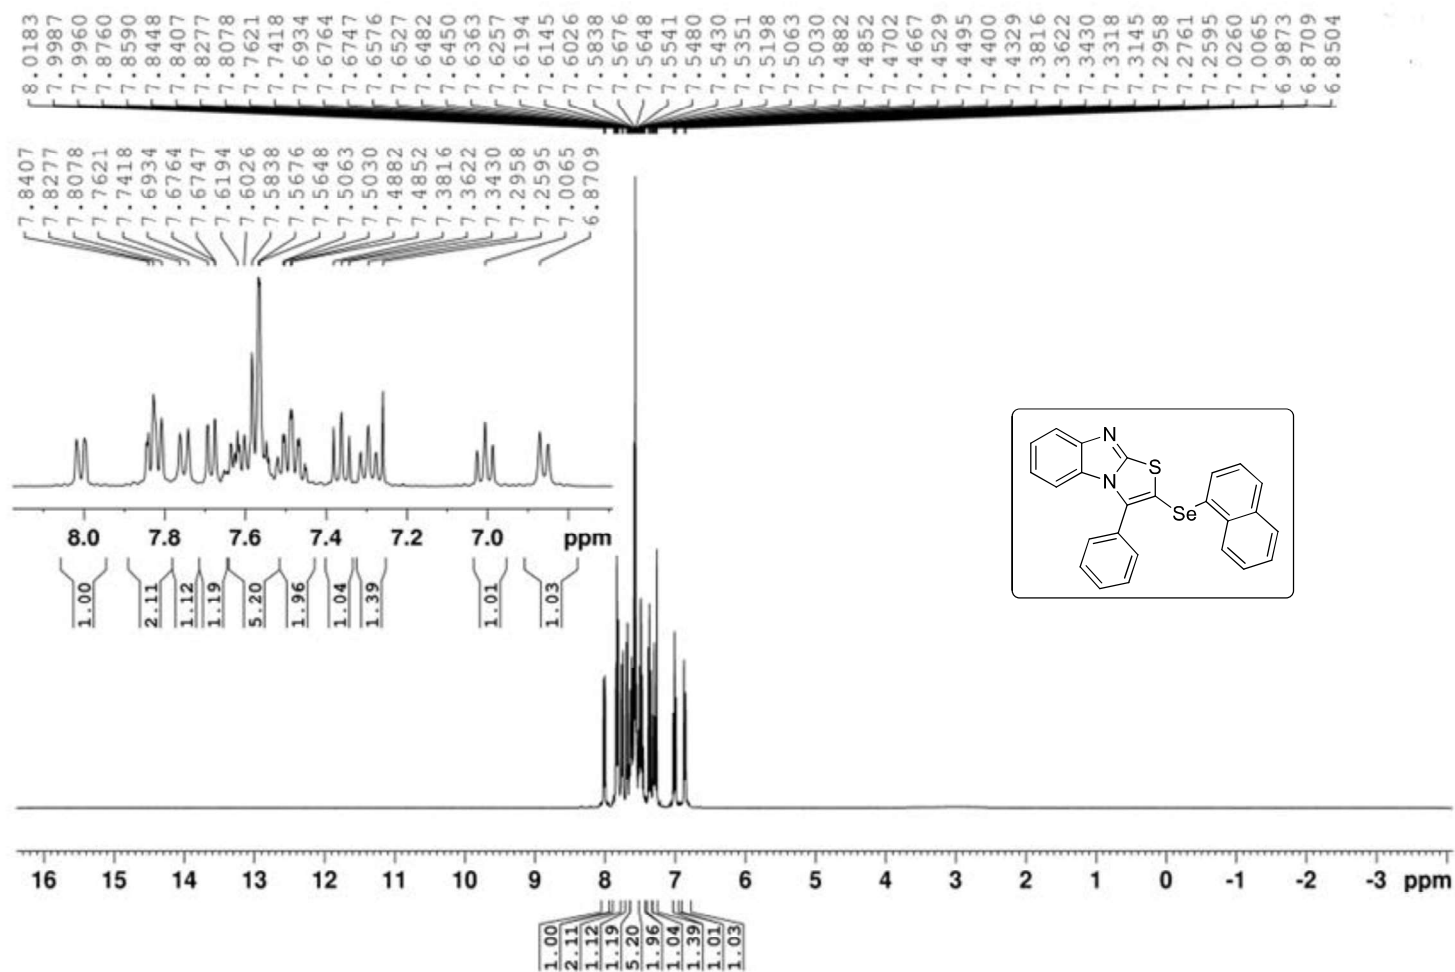

<sup>13</sup>C NMR spectra of 3h

157.11  
147.80  
137.38  
134.11  
133.07  
131.66  
130.52  
130.24  
129.93  
129.51  
129.31  
128.90  
128.71  
128.57  
126.97  
126.53  
126.00  
123.72  
120.77  
119.17  
111.47  
108.05  
77.38  
77.06  
76.74

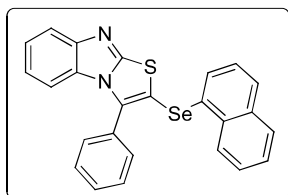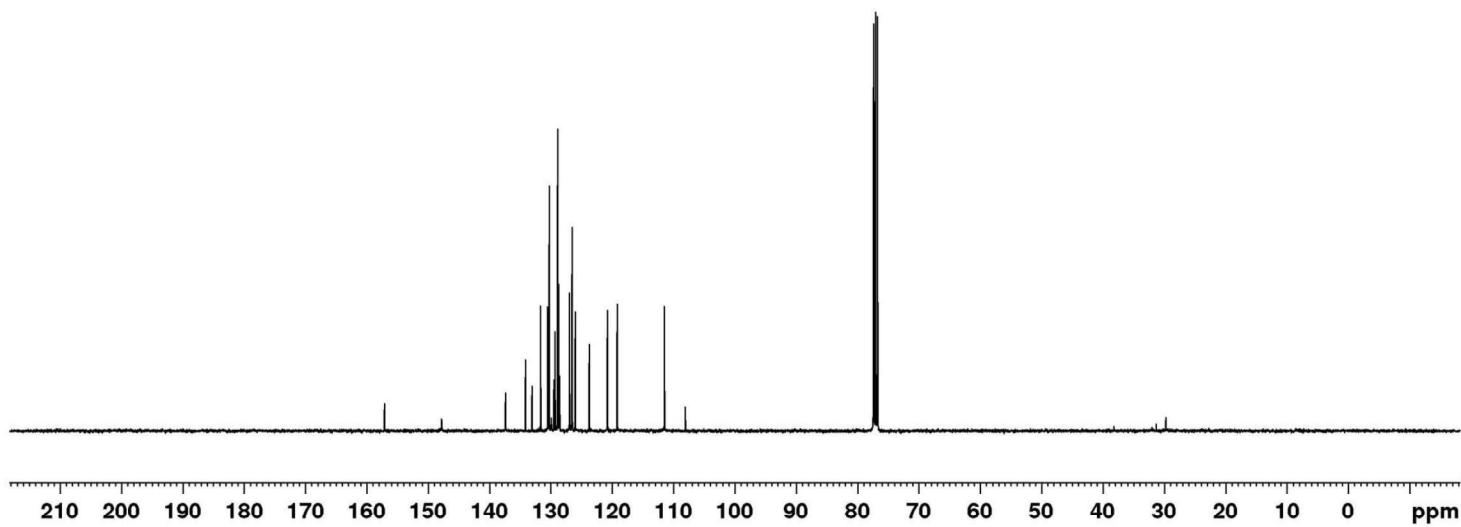

# <sup>1</sup>H NMR spectra of 4a

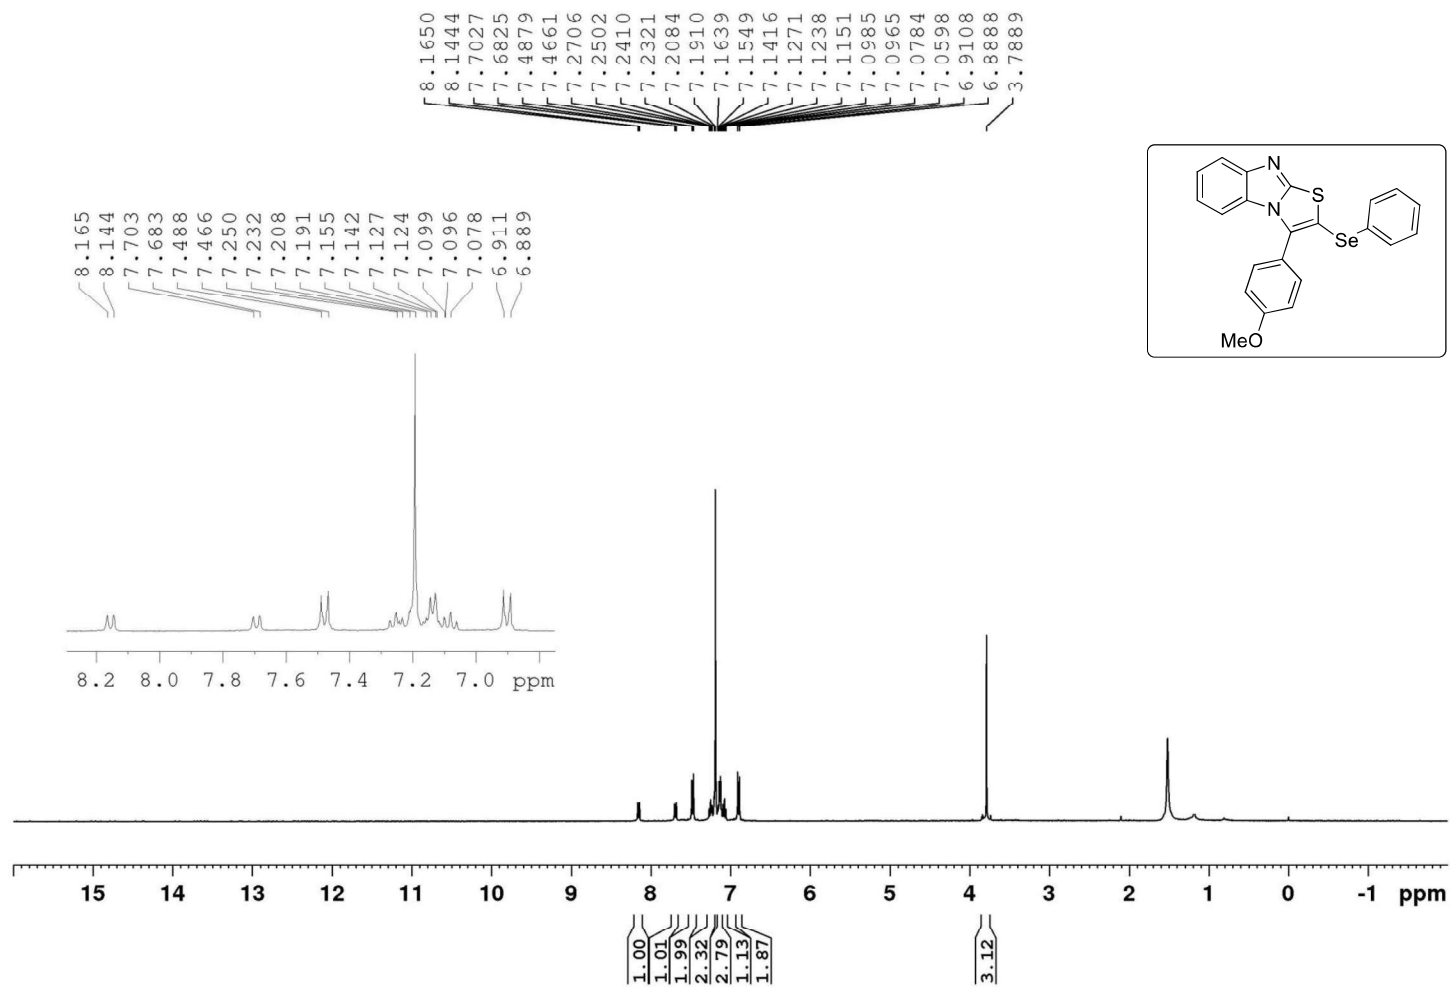

<sup>13</sup>C NMR spectra of 4a

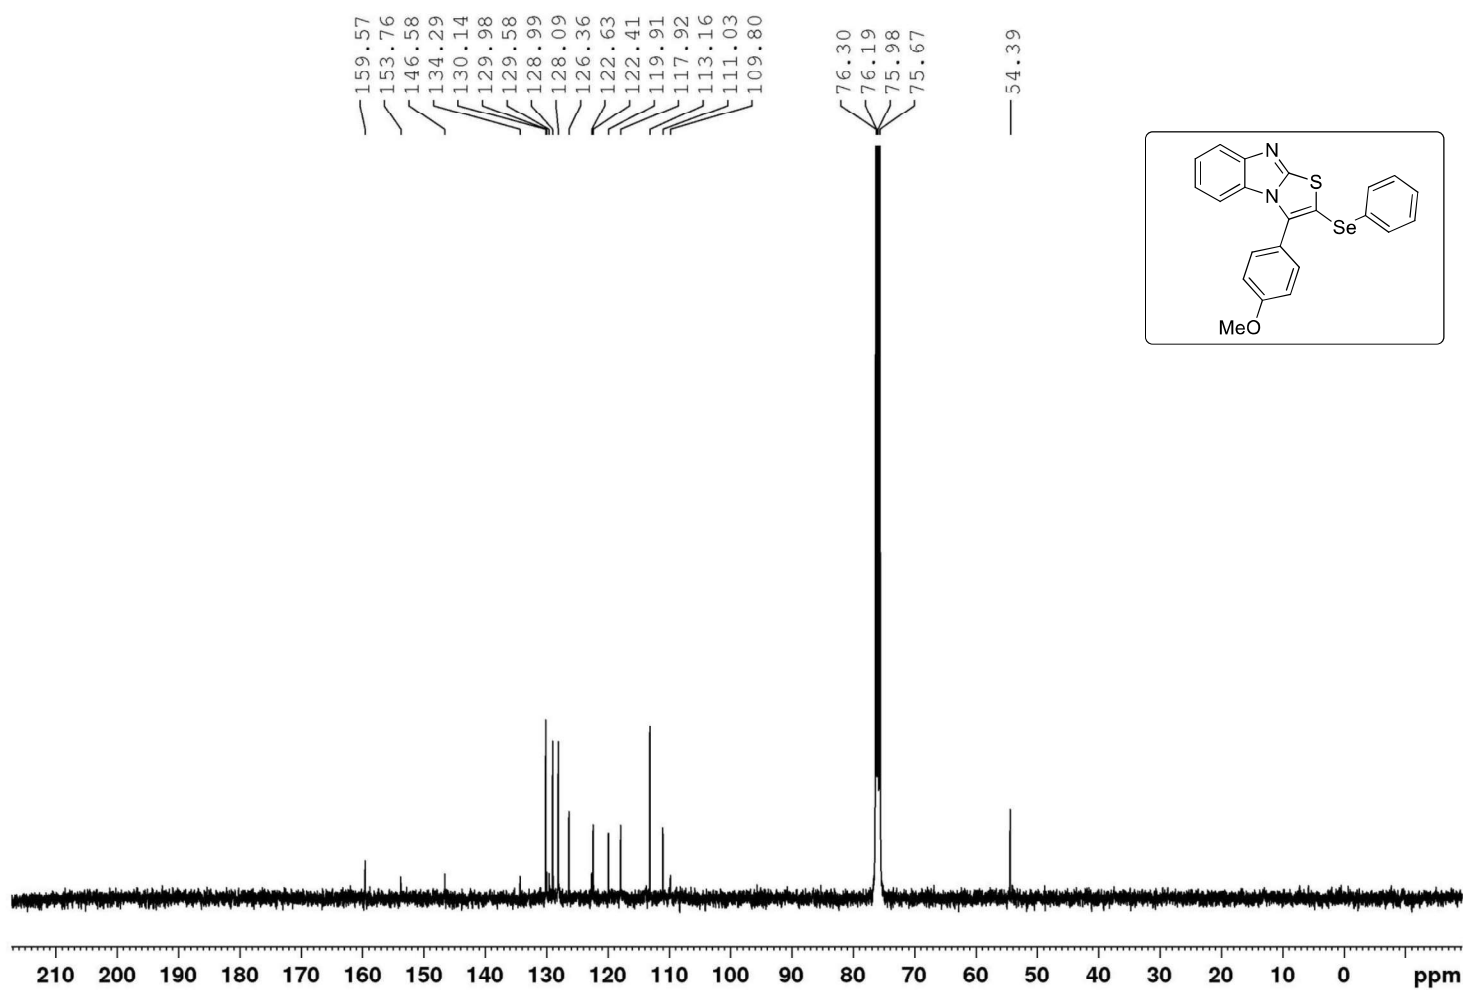

<sup>1</sup>H NMR spectra of 4b

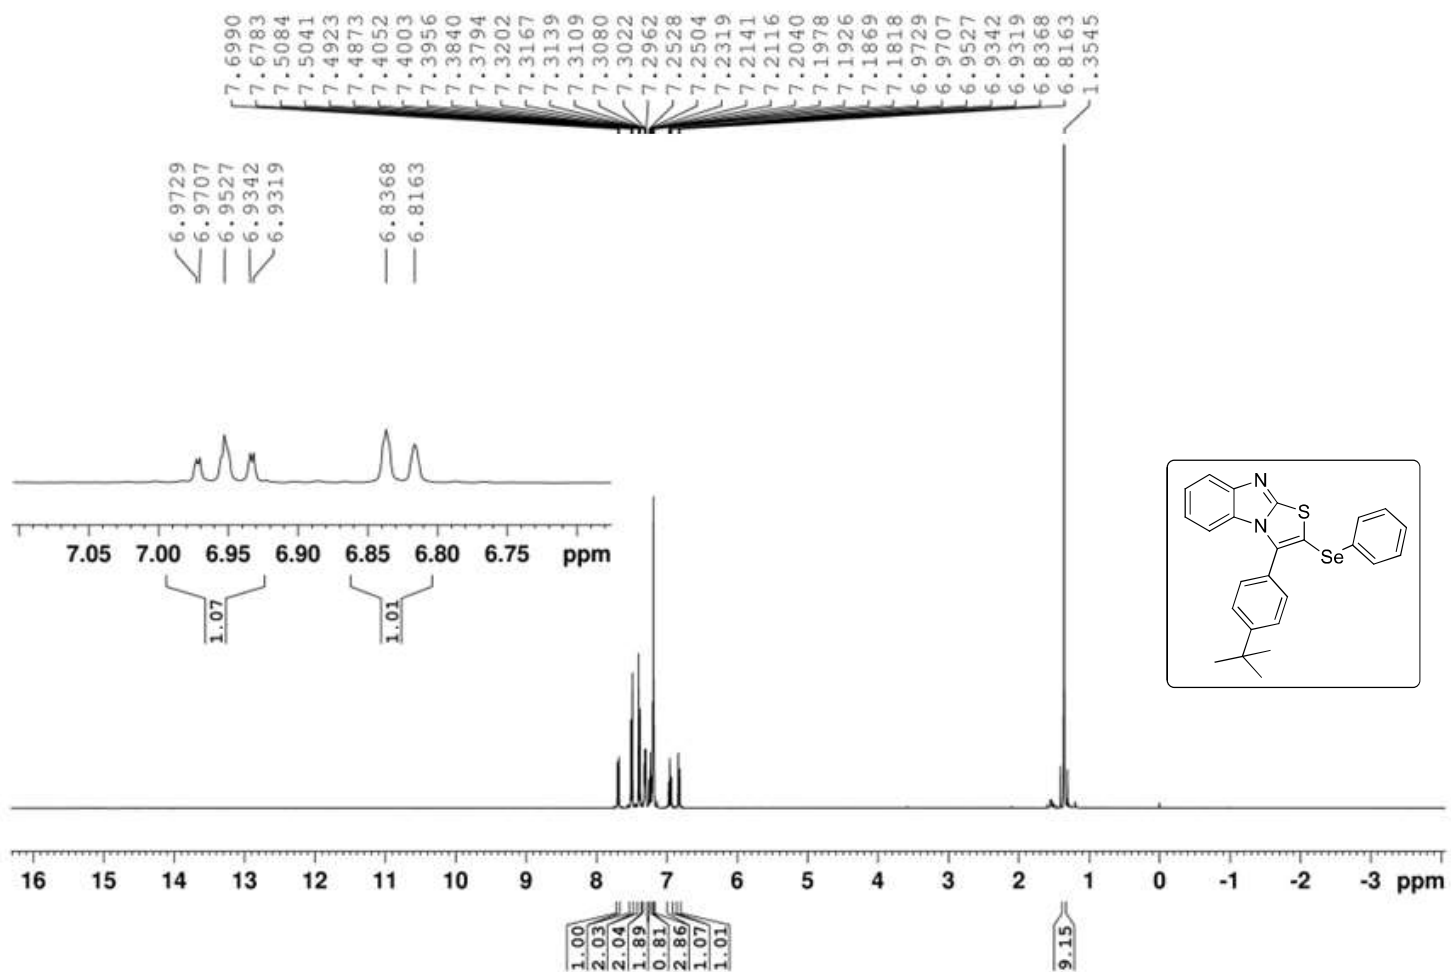

<sup>13</sup>C NMR spectra of 4b

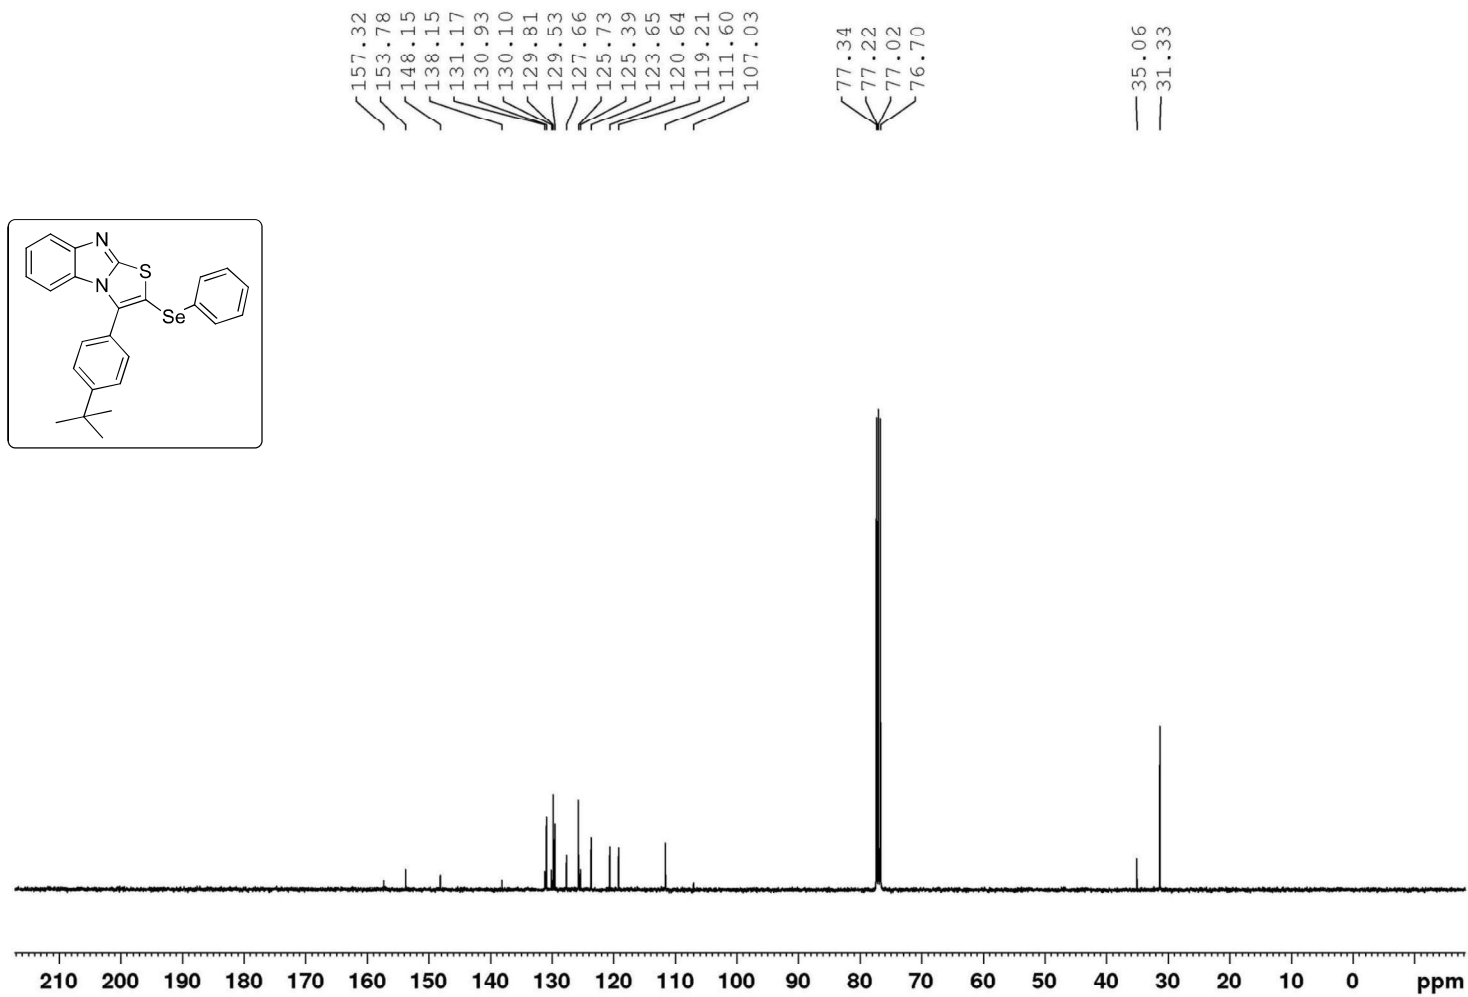

<sup>1</sup>H NMR spectra of 4c

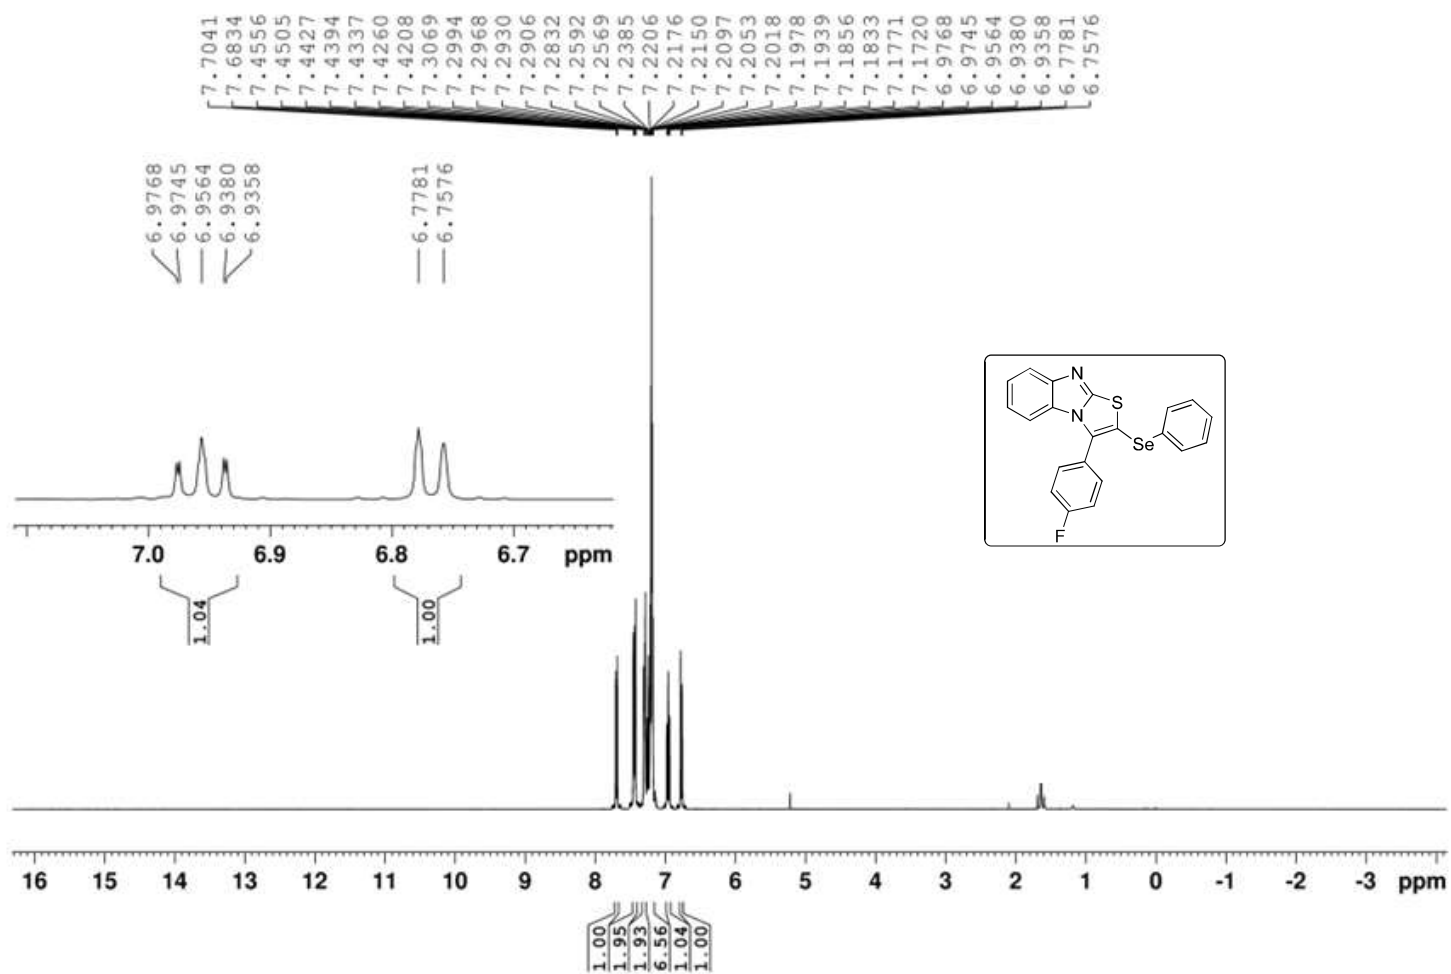



# <sup>13</sup>C NMR spectra of 4c

165.10  
162.60  
157.09  
148.12  
136.83  
132.29  
132.21  
131.02  
130.95  
130.88  
129.92  
129.64  
127.88  
124.56  
124.53  
123.83  
120.84  
119.41  
116.32  
116.11  
111.23  
107.97  
77.35  
77.24  
77.03  
76.72

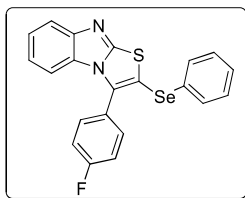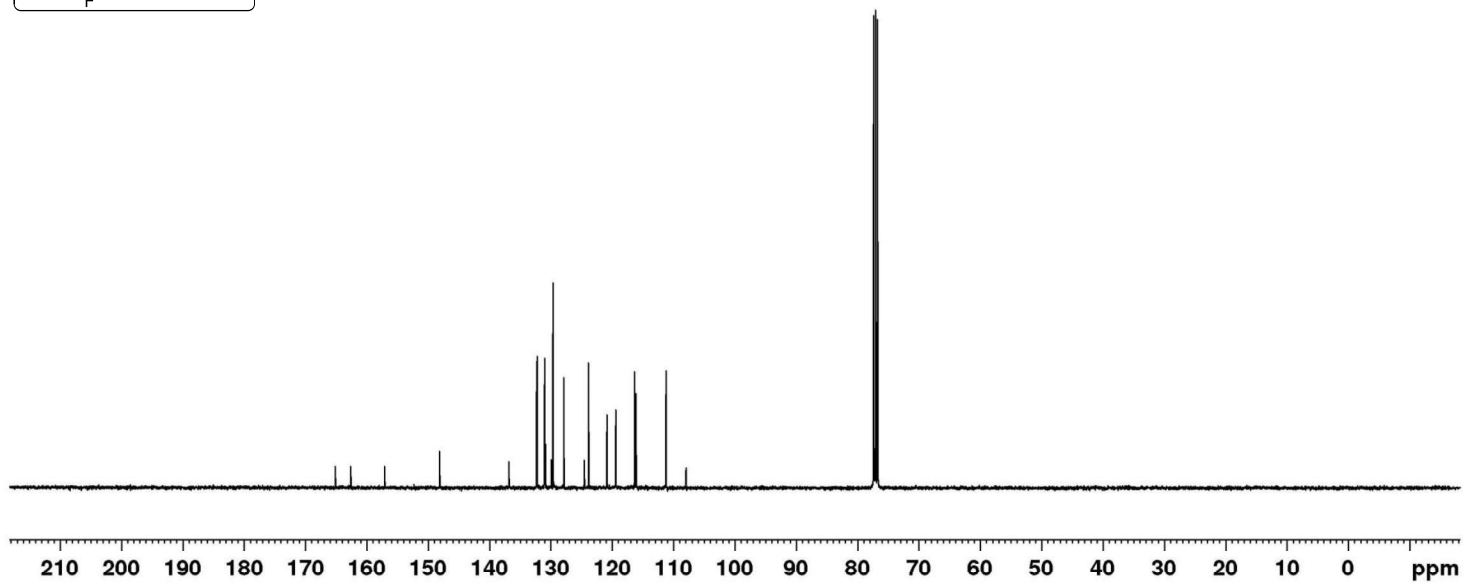

$^{19}\text{F}$  NMR spectra of 4c

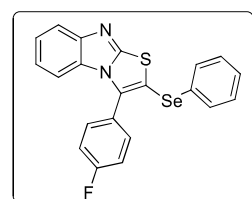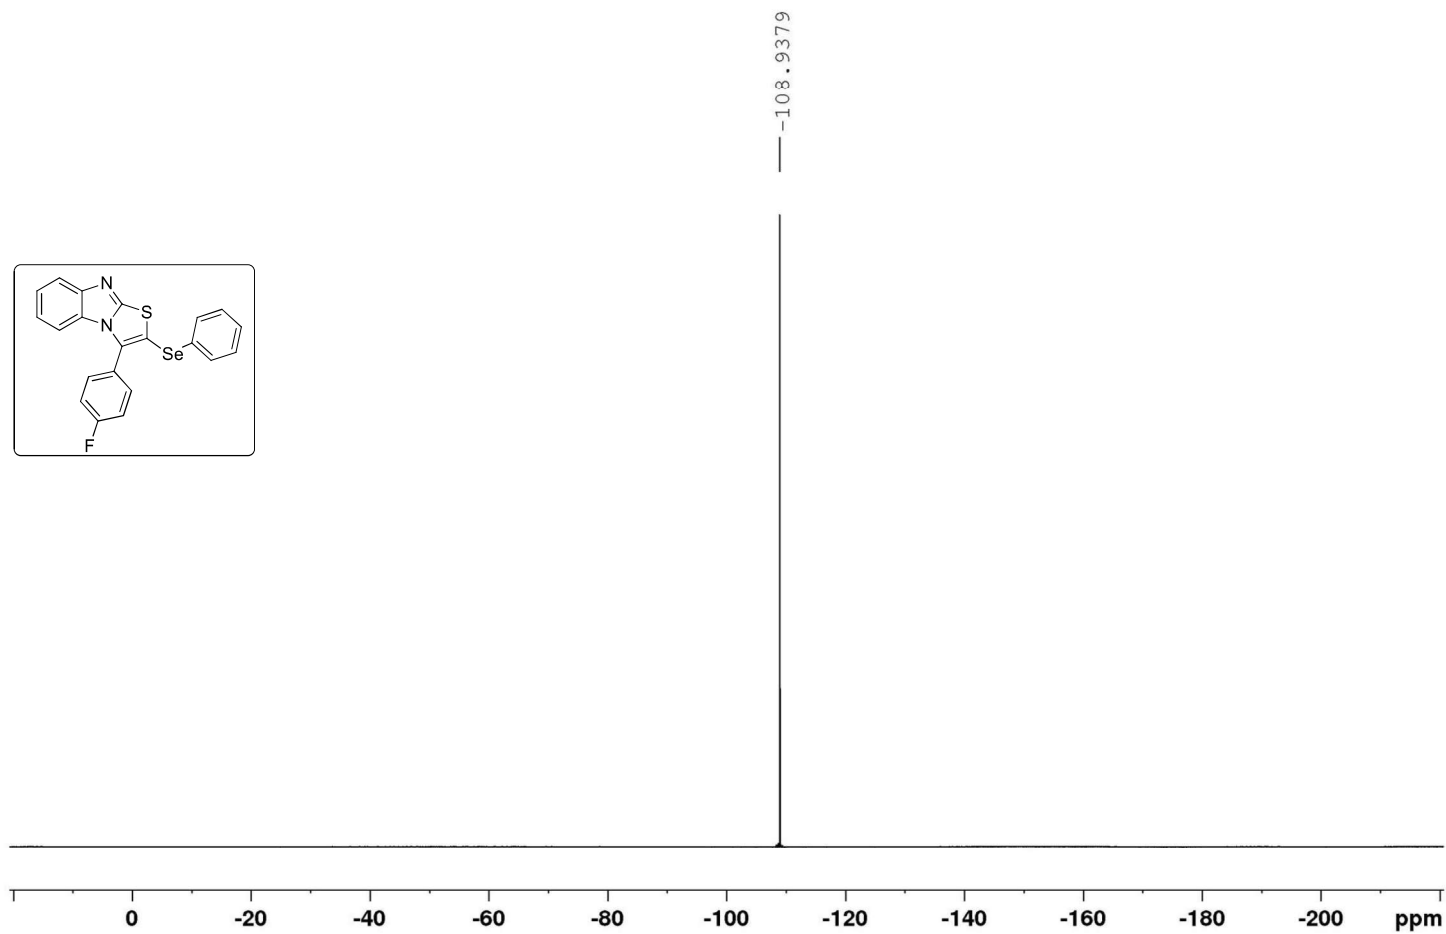

<sup>1</sup>H NMR spectra of 4d

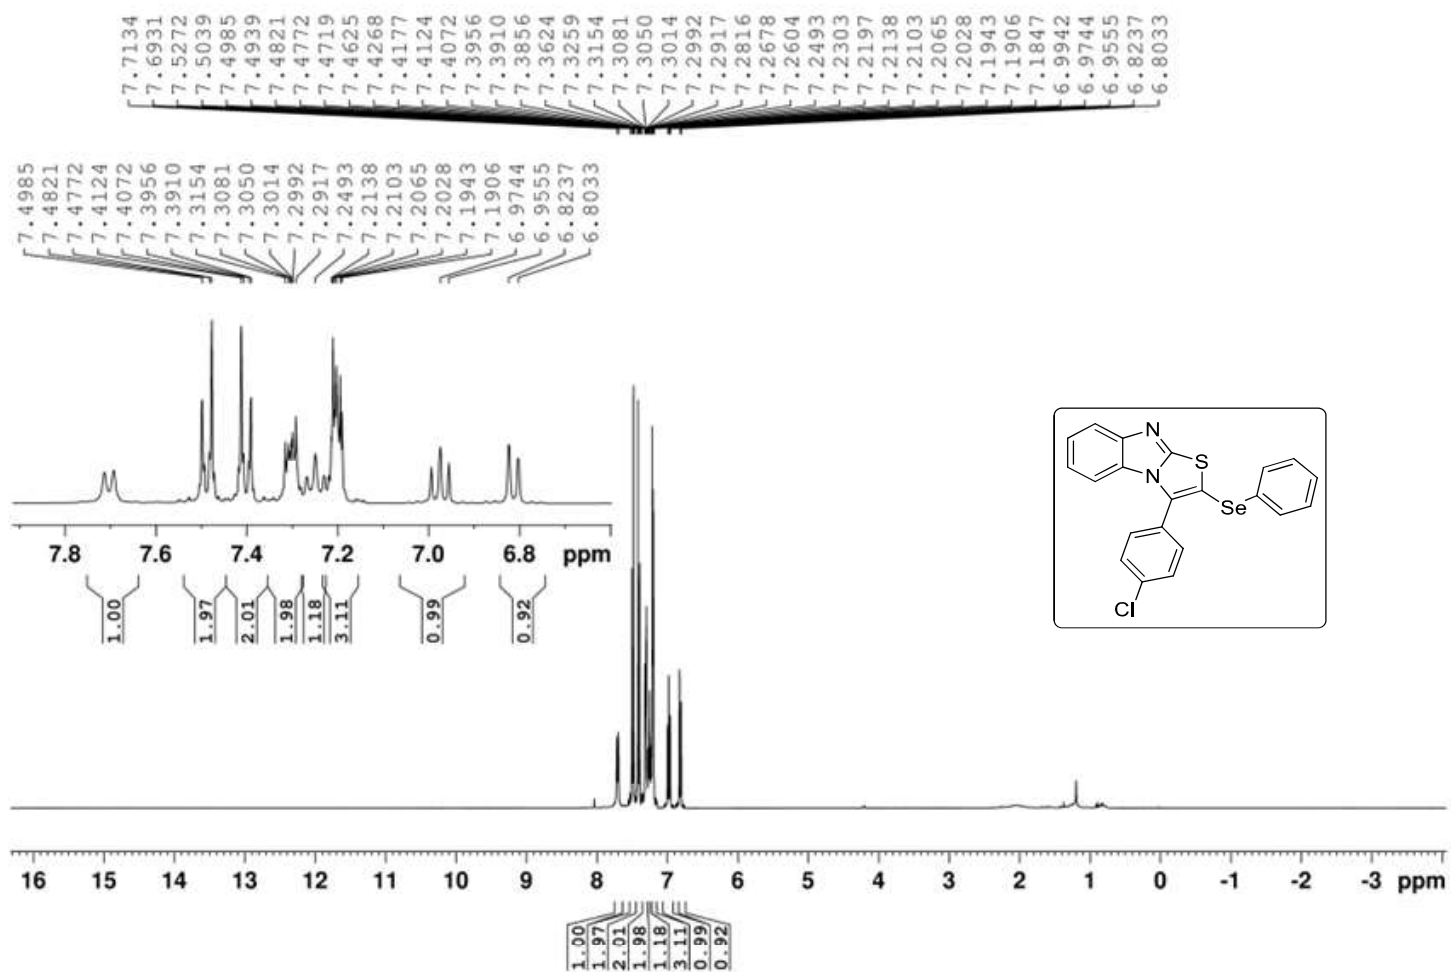

# <sup>13</sup>C NMR spectra of 4d

157.09  
148.10  
136.71  
136.61  
131.53  
131.05  
130.83  
129.87  
129.68  
129.28  
127.92  
126.94  
123.89  
120.90  
119.43  
111.30  
108.21

77.39  
77.08  
76.76

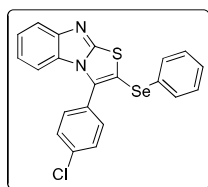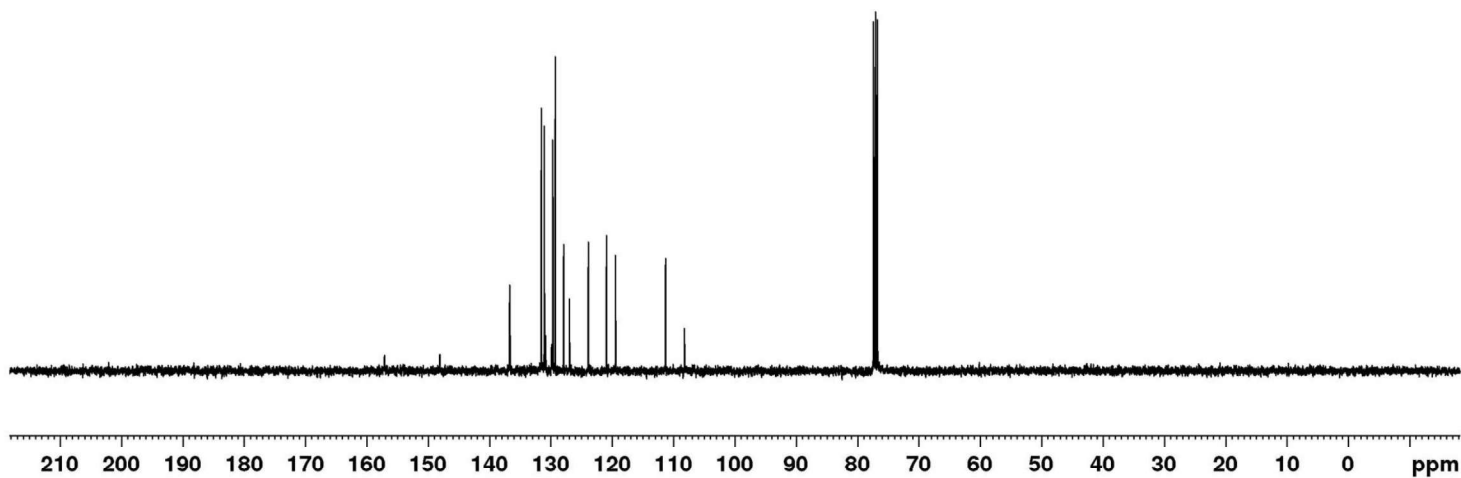

<sup>1</sup>H NMR spectra of 4e

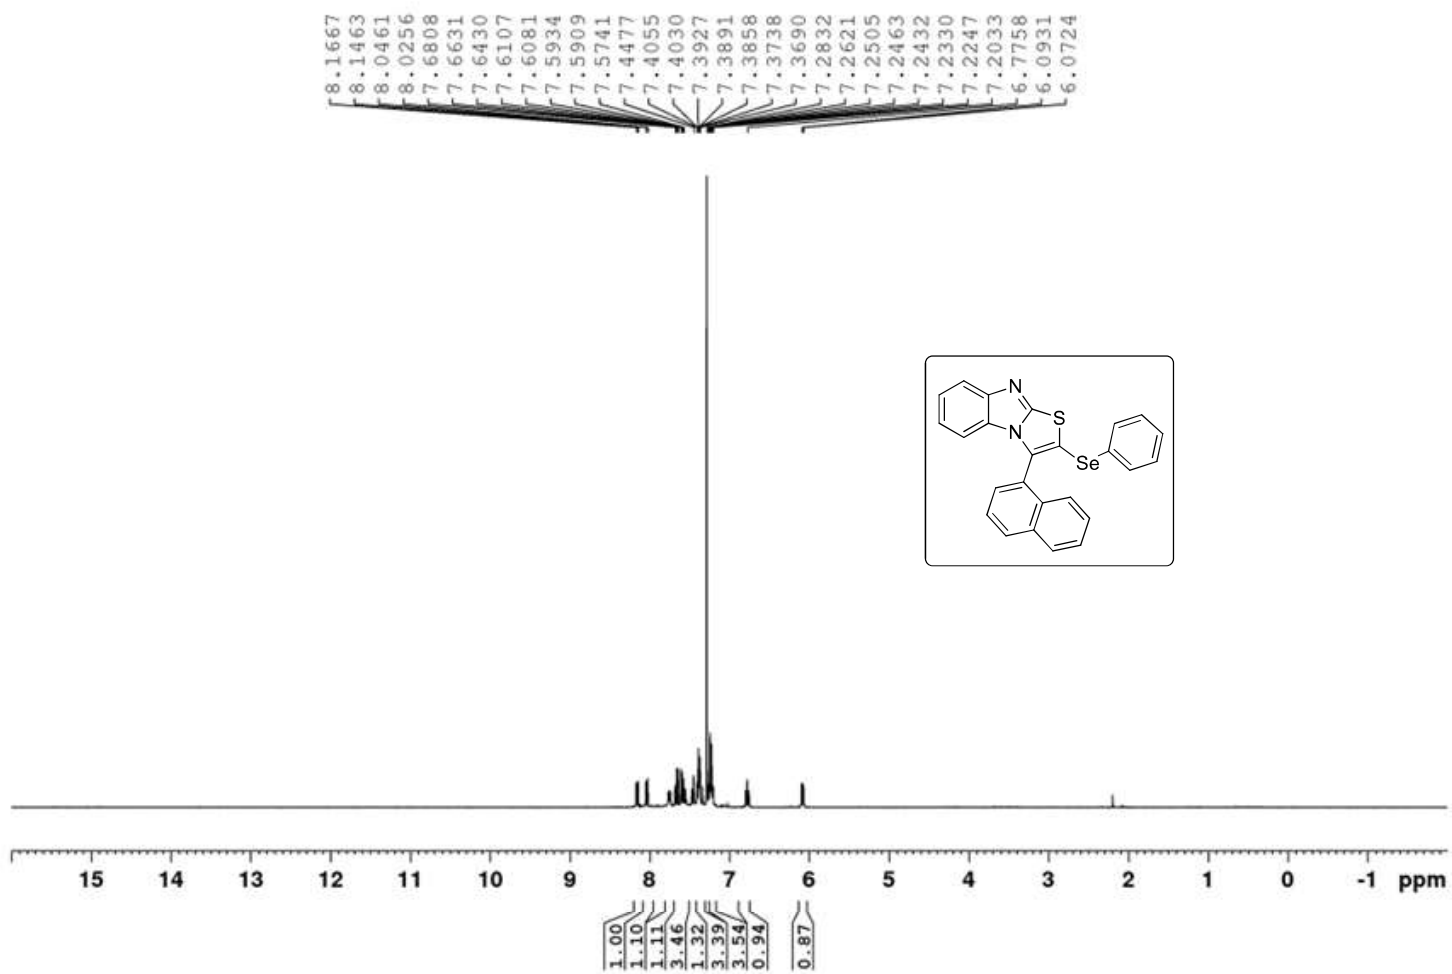

# <sup>13</sup>C NMR spectra of 4e

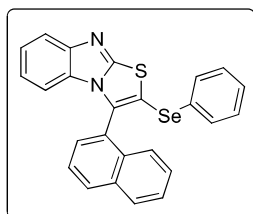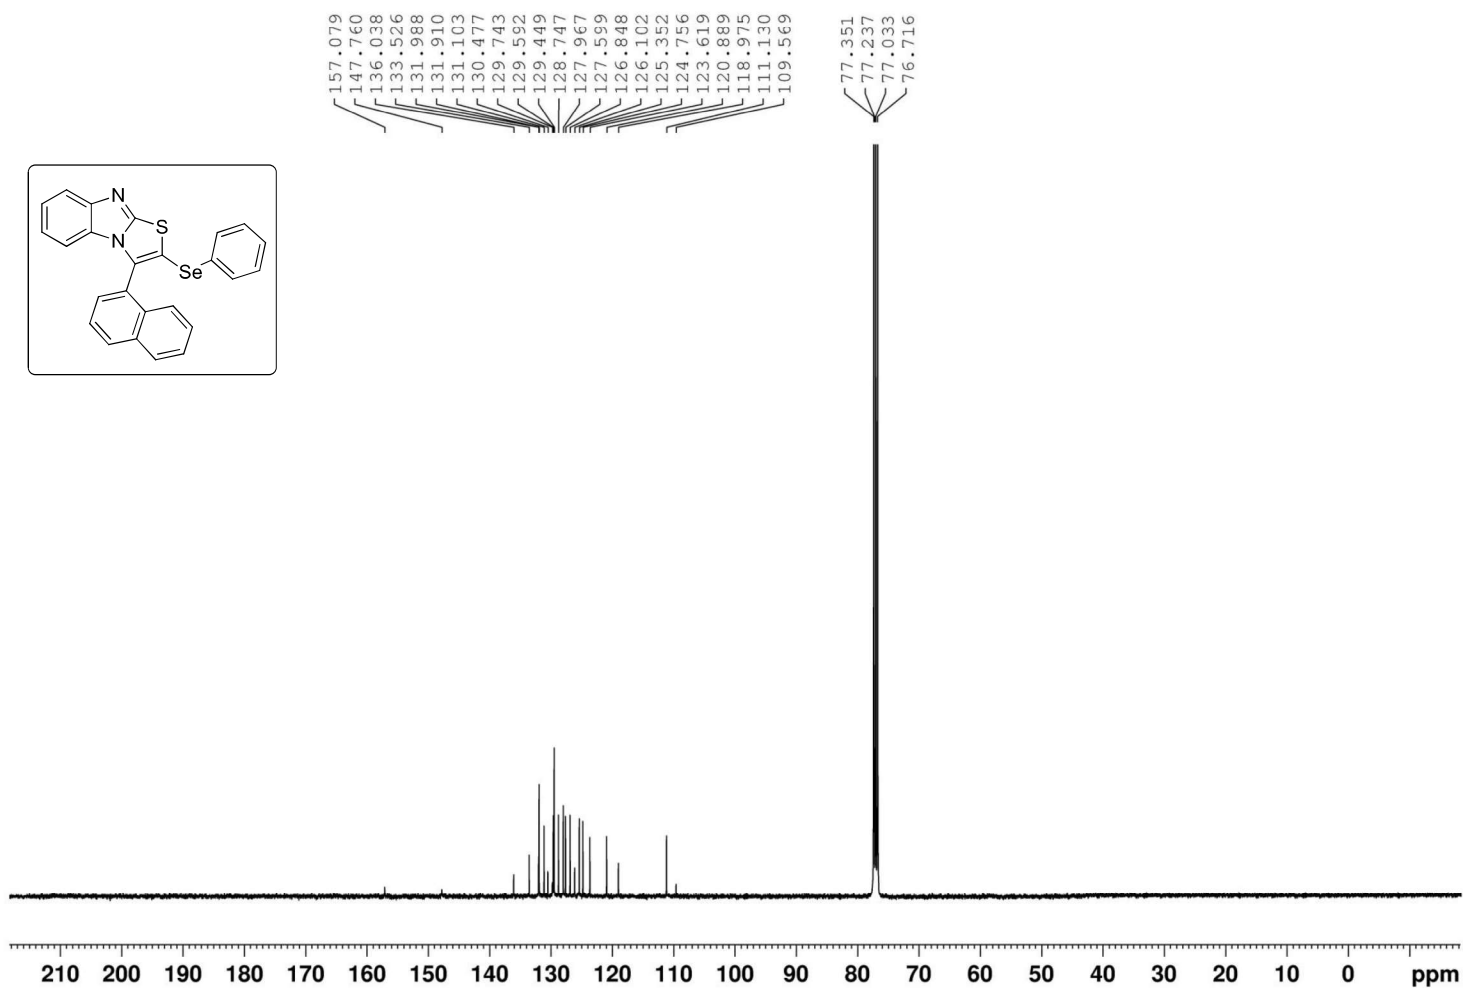

<sup>1</sup>H NMR spectra of 4f

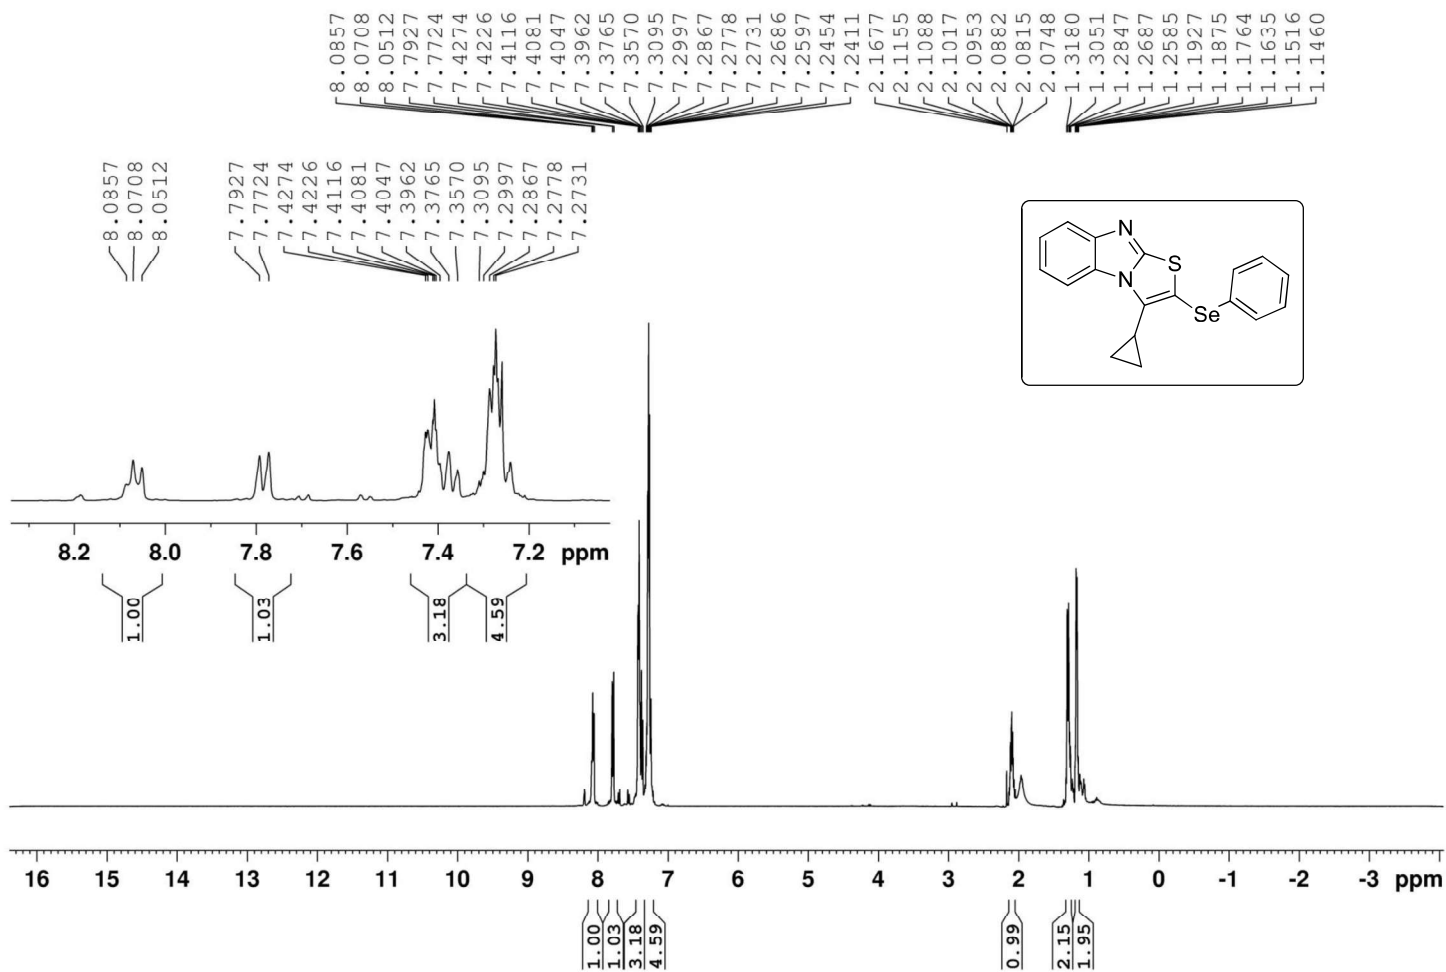

<sup>13</sup>C NMR spectra of 4f

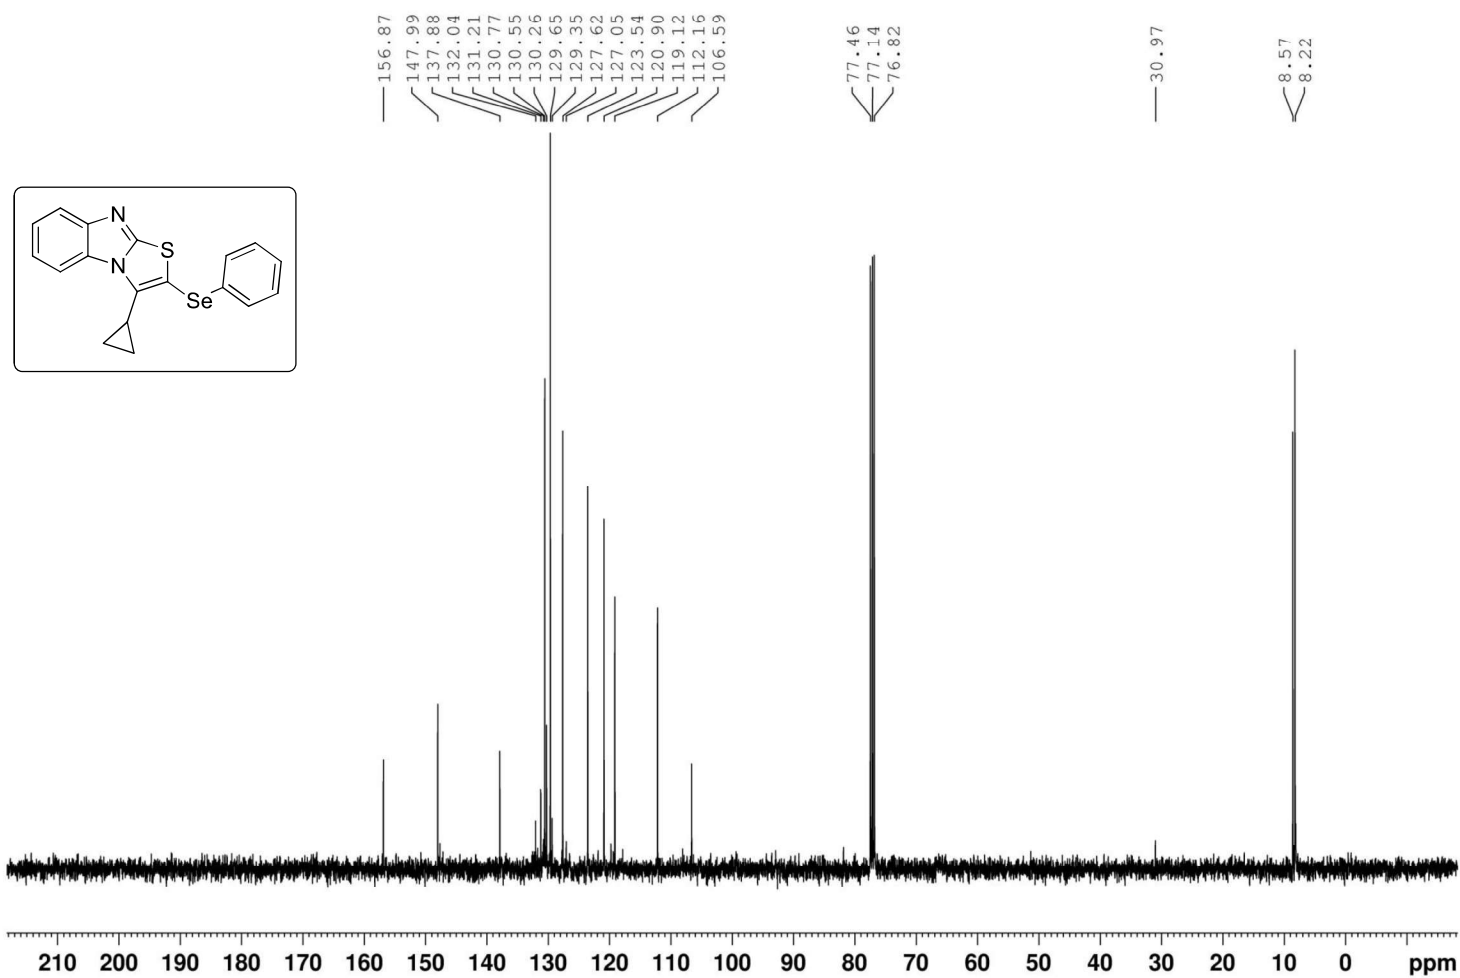



# <sup>1</sup>H NMR spectra of 4g

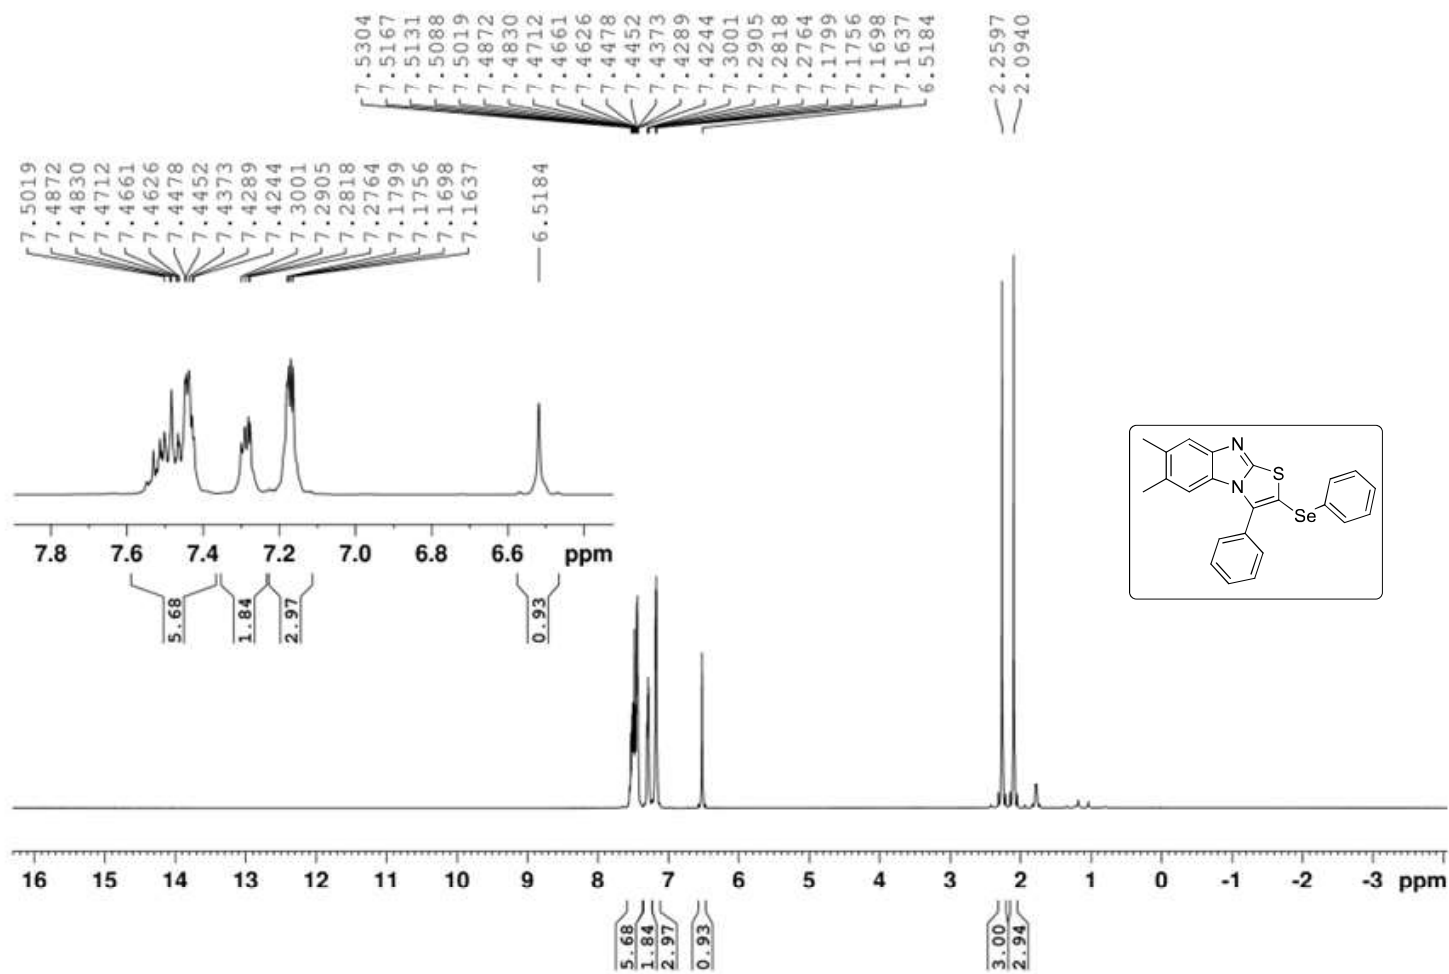

# <sup>13</sup>C NMR spectra of 4g

156.31  
146.74  
137.98  
132.70  
131.28  
130.82  
130.39  
130.17  
129.73  
129.54  
128.74  
128.67  
128.49  
127.62  
119.28  
111.67  
106.55

77.38  
77.06  
76.74

20.49  
20.39

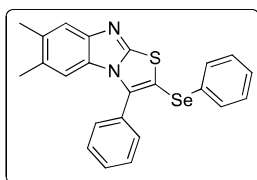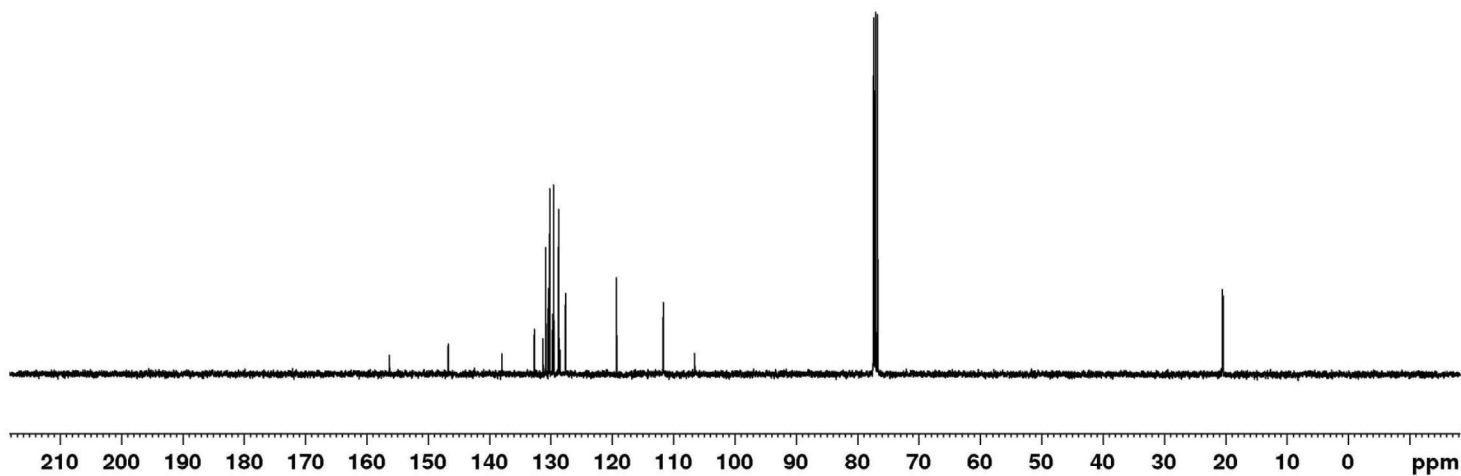

# <sup>1</sup>H NMR spectra of 4h

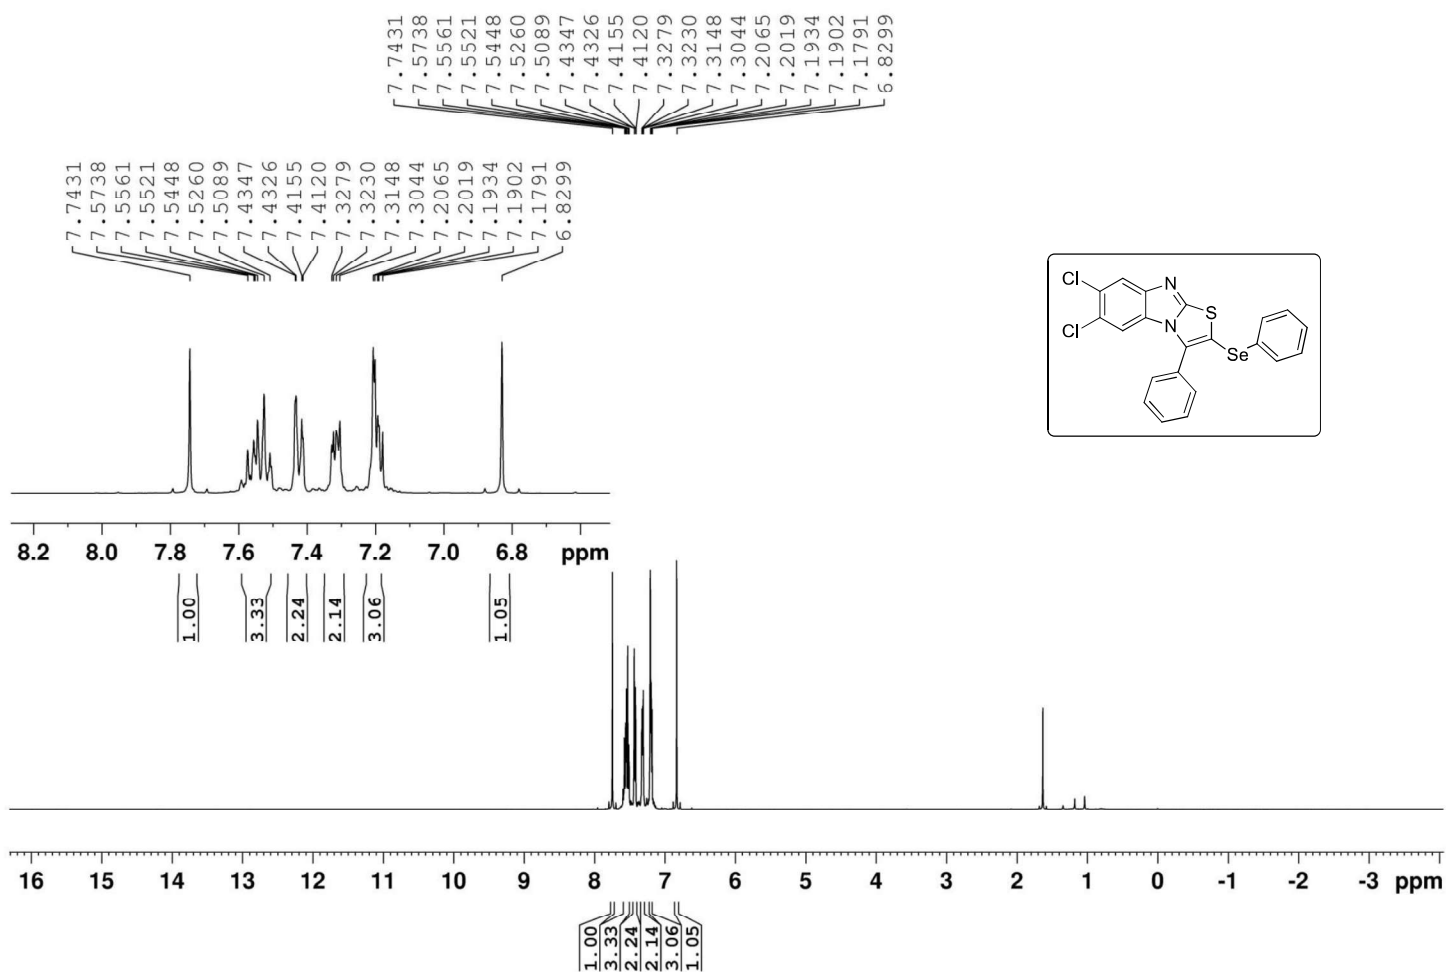

# <sup>13</sup>C NMR spectra of 4h

158.94  
147.20  
137.02  
131.63  
130.93  
130.34  
130.00  
129.67  
129.17  
128.76  
128.15  
127.83  
124.55  
120.21  
112.64  
109.20

77.36  
77.04  
76.72

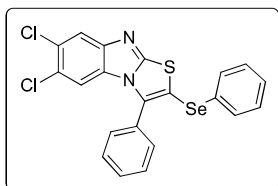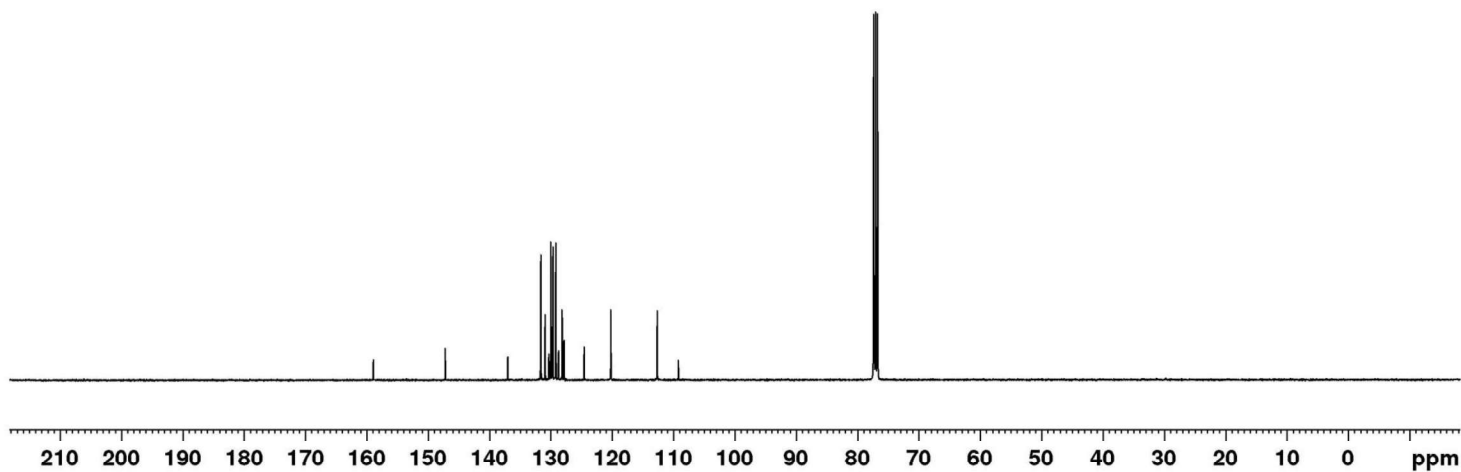

# <sup>1</sup>H NMR spectra of 5a

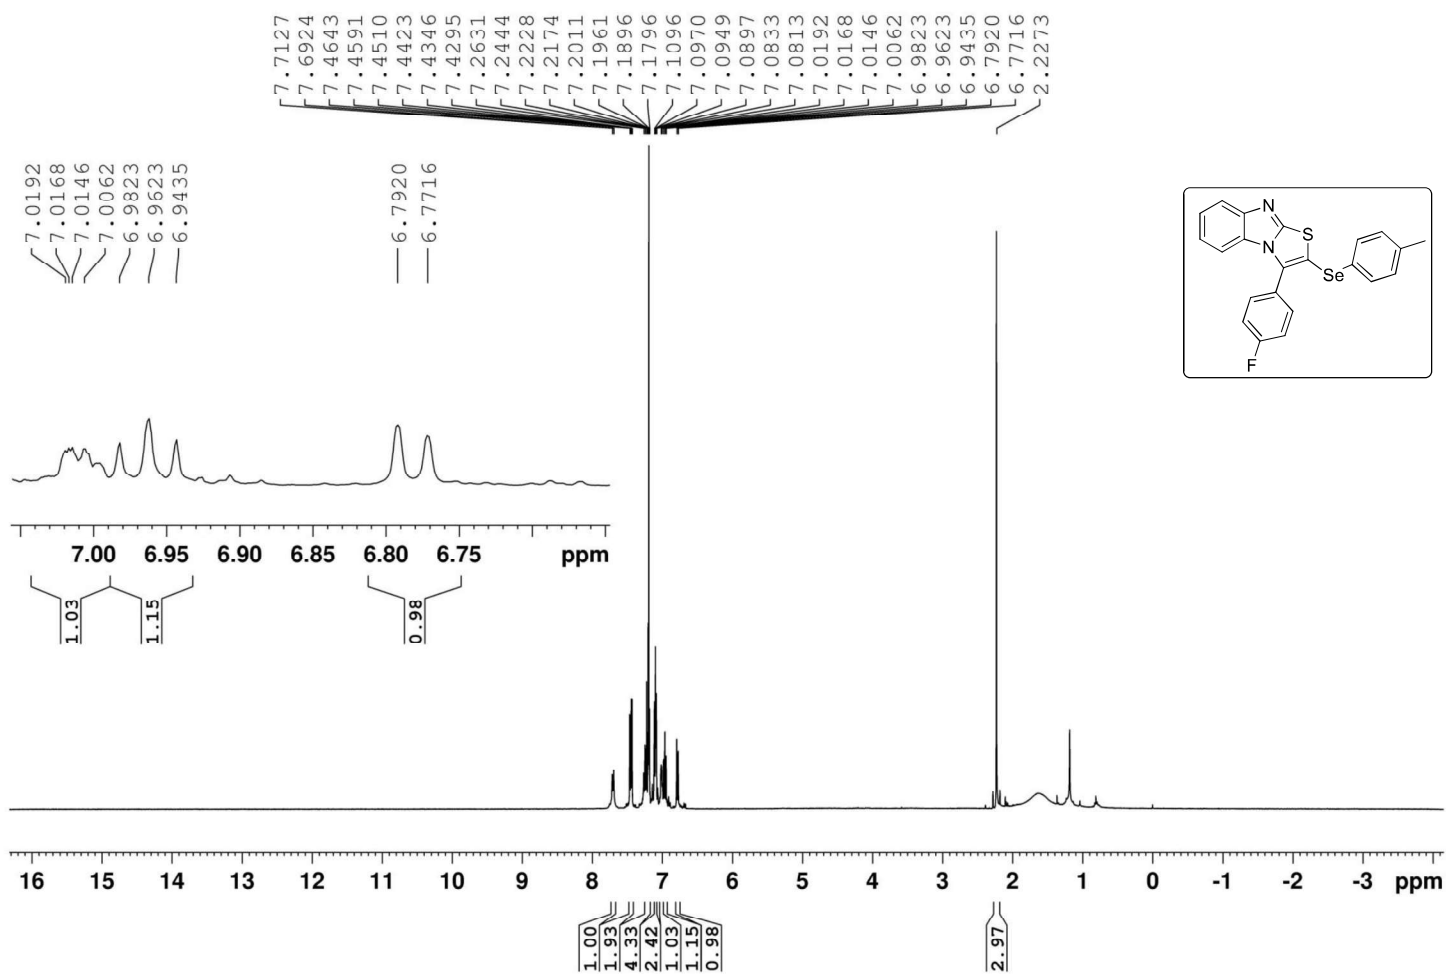

# <sup>13</sup>C NMR spectra of 5a

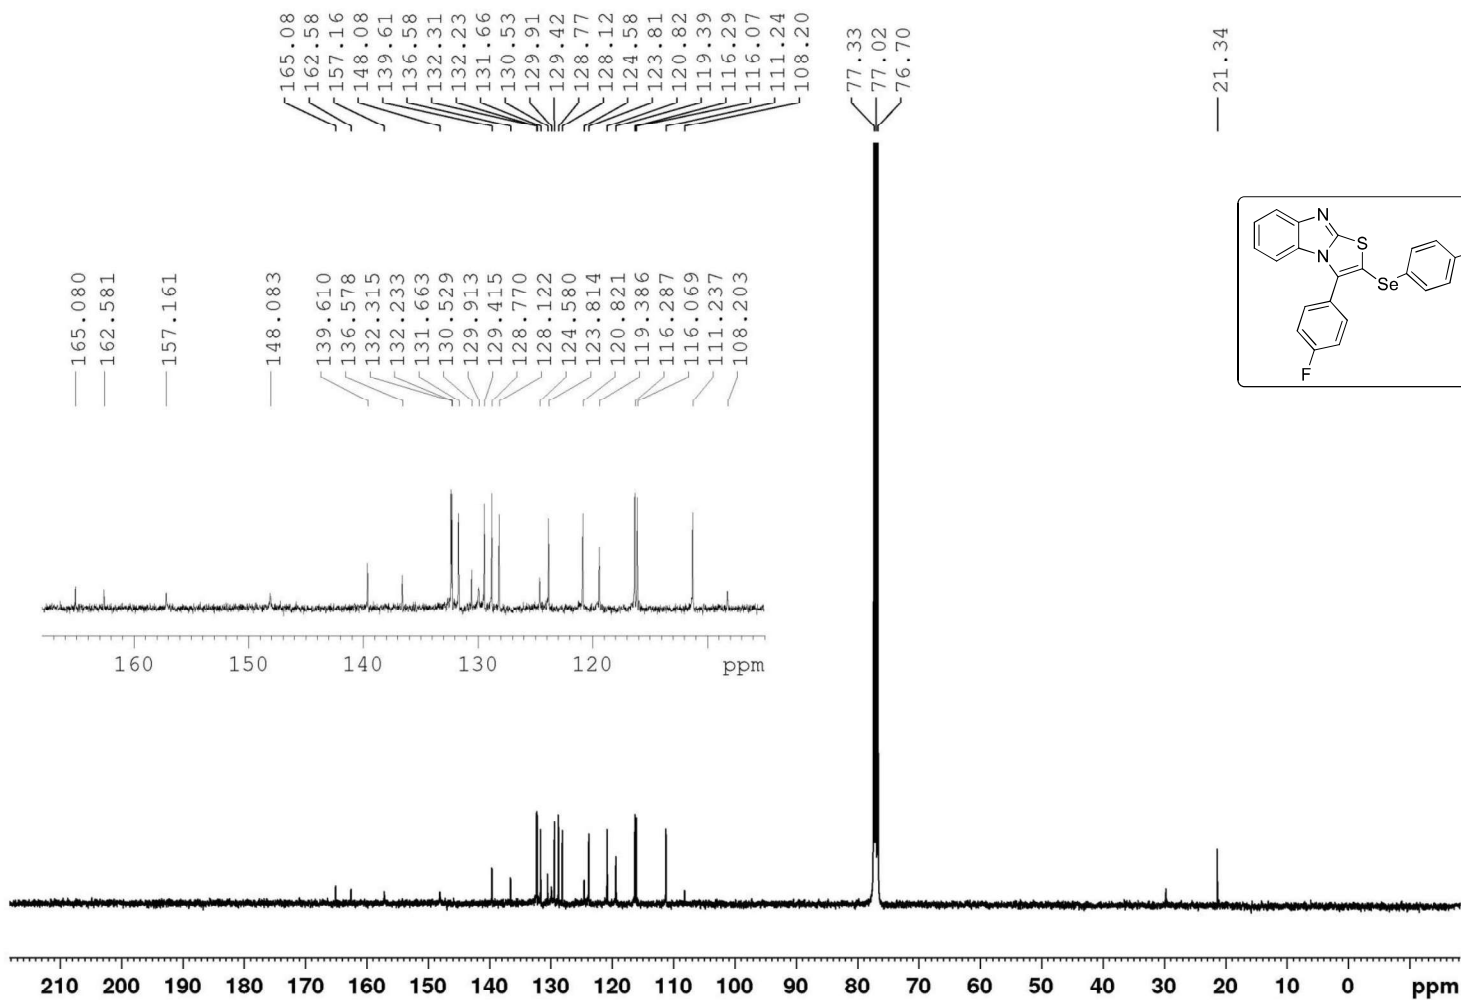

<sup>19</sup>F NMR spectra of 5a

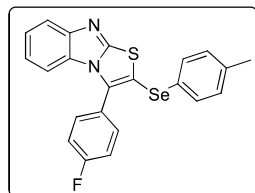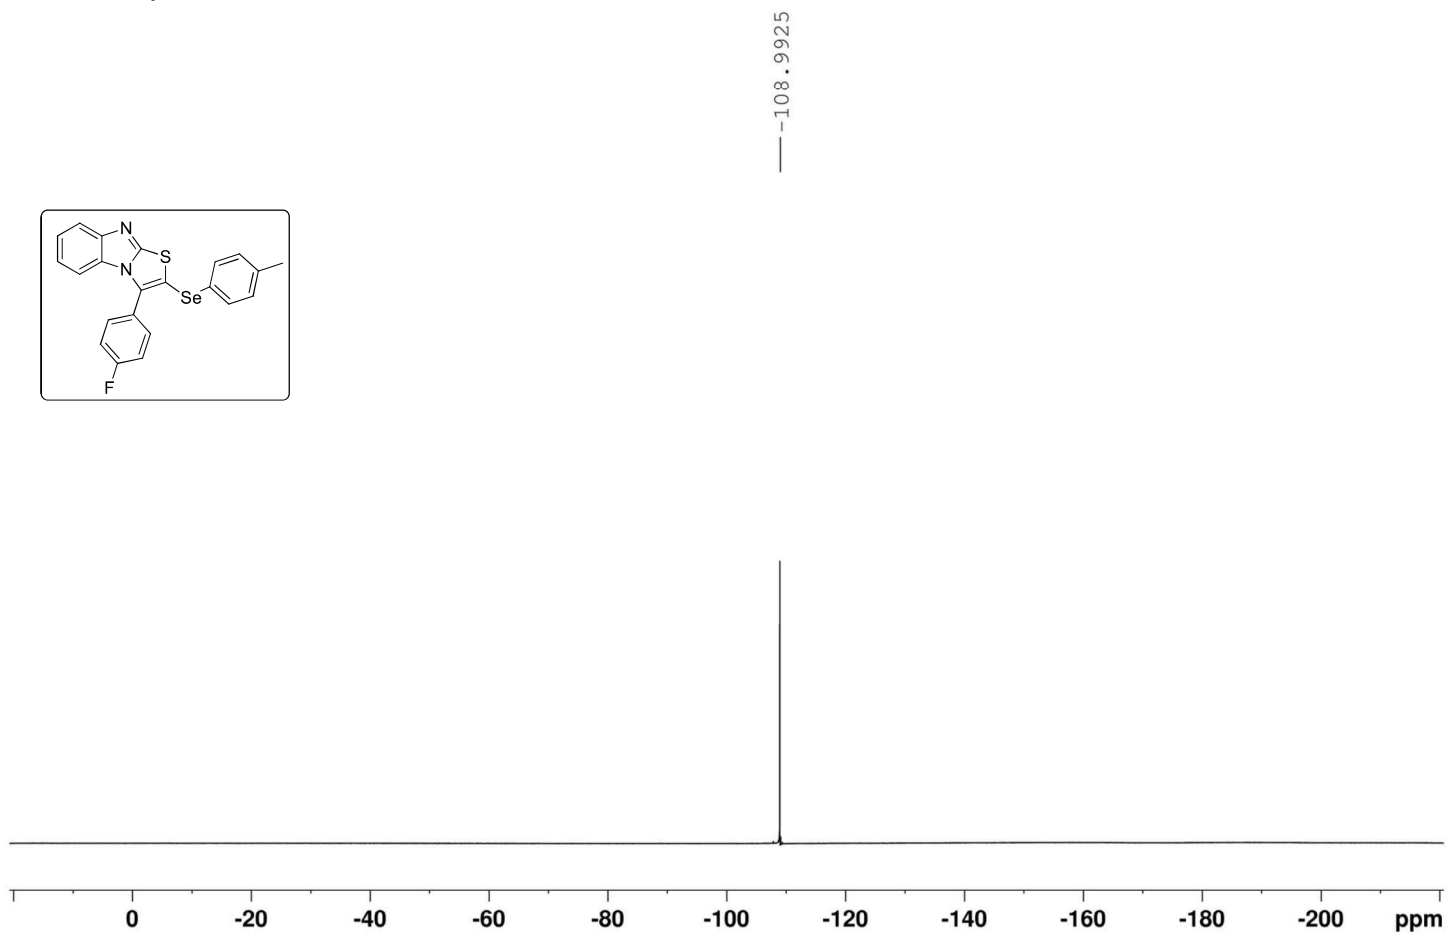

<sup>1</sup>H NMR spectra of 5b

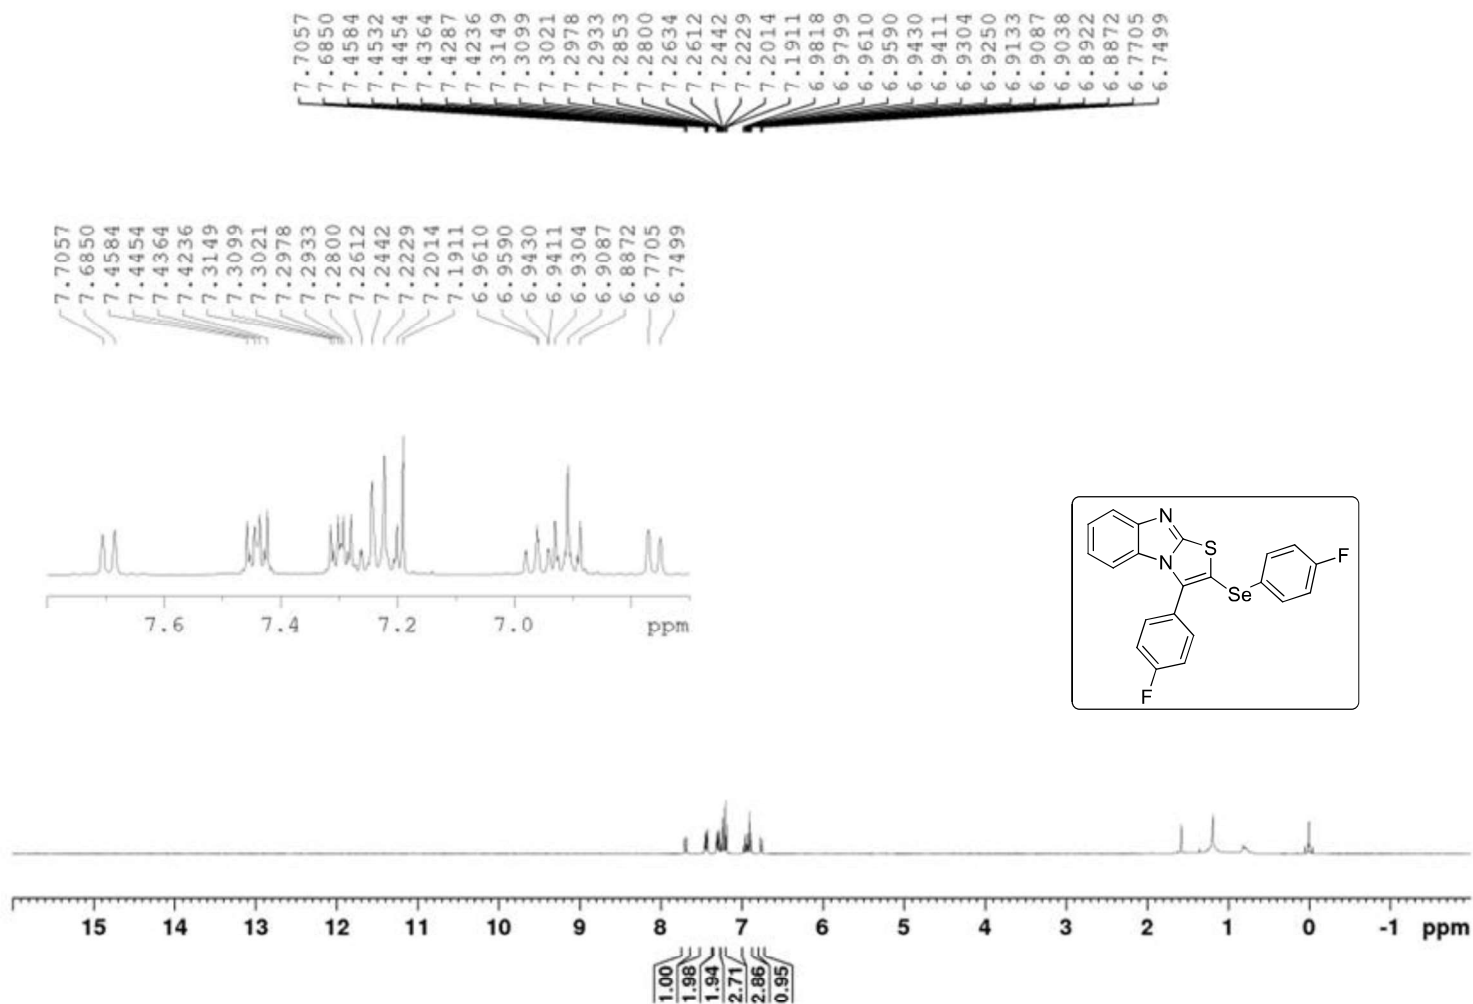



# <sup>13</sup>C NMR spectra of 5b

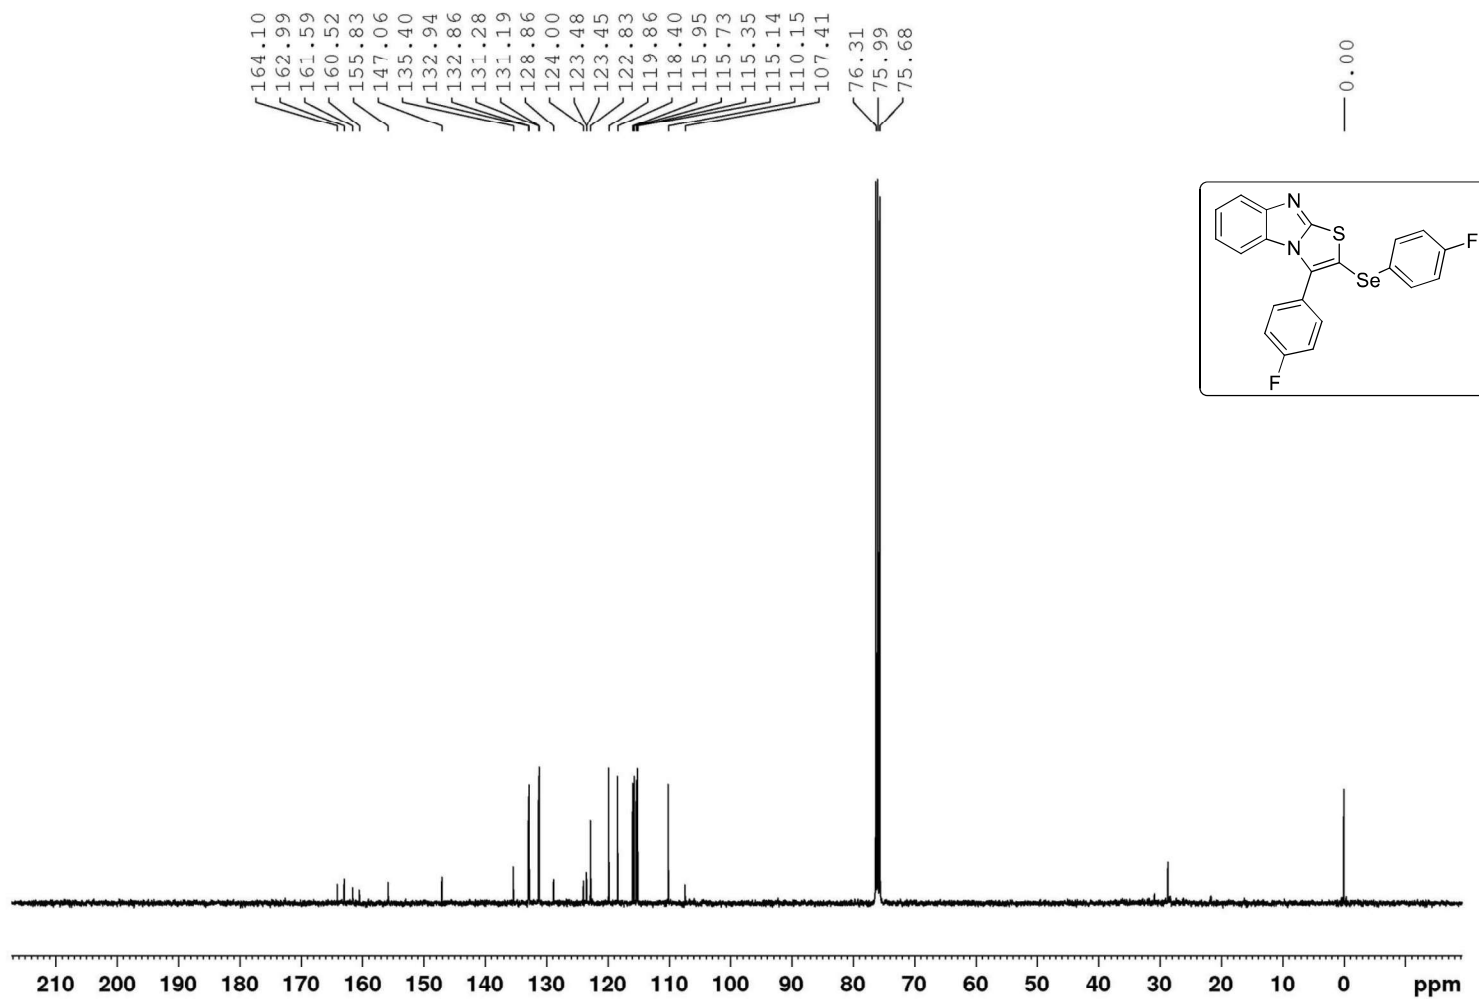

<sup>19</sup>F NMR spectra of 5b

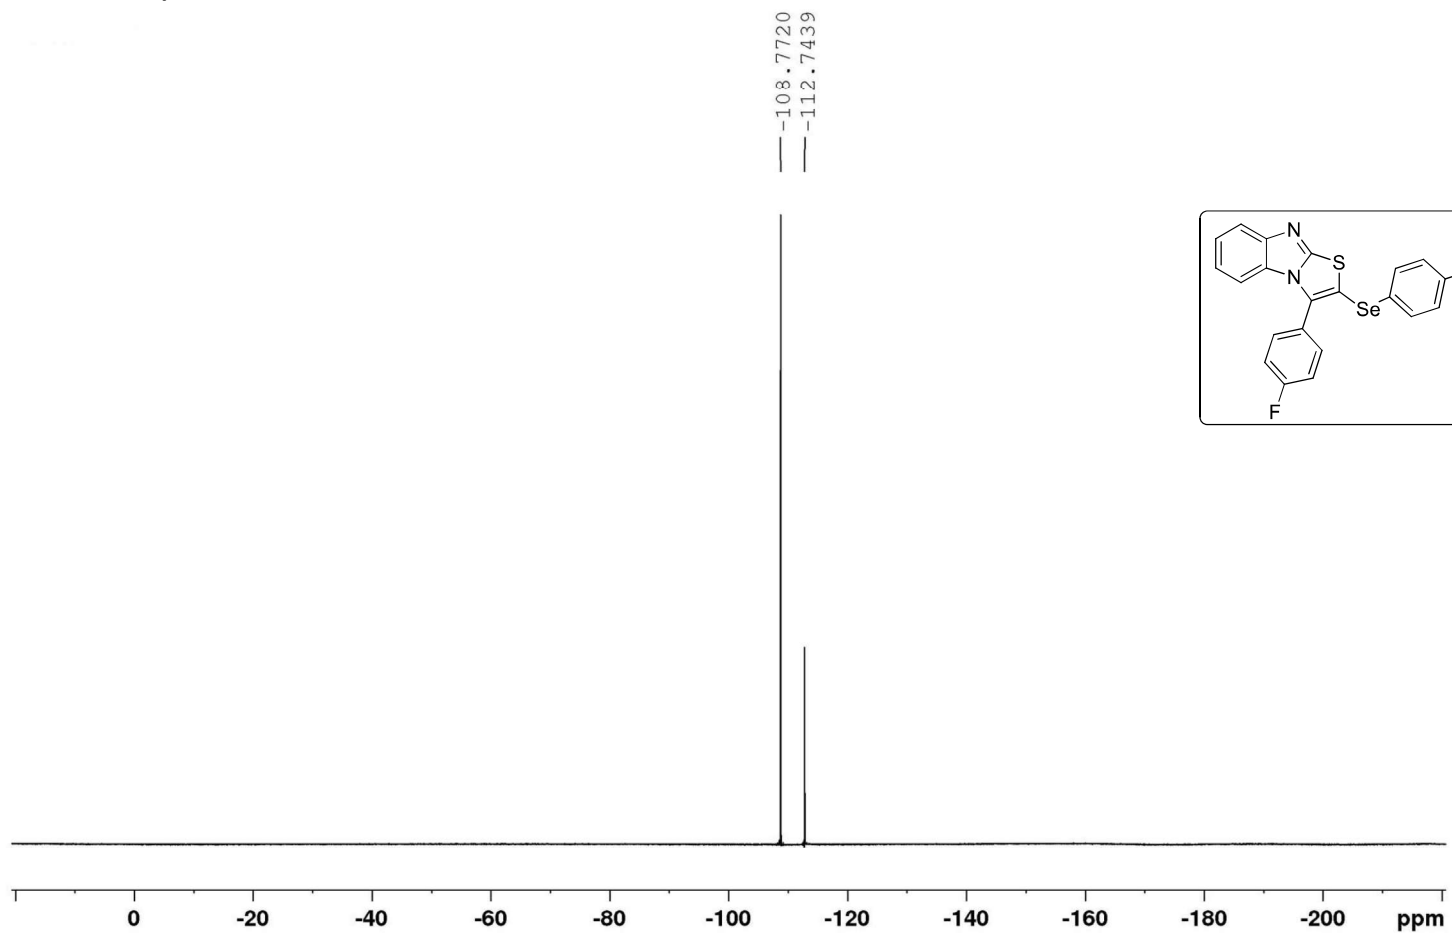

# <sup>1</sup>H NMR spectra of 5c

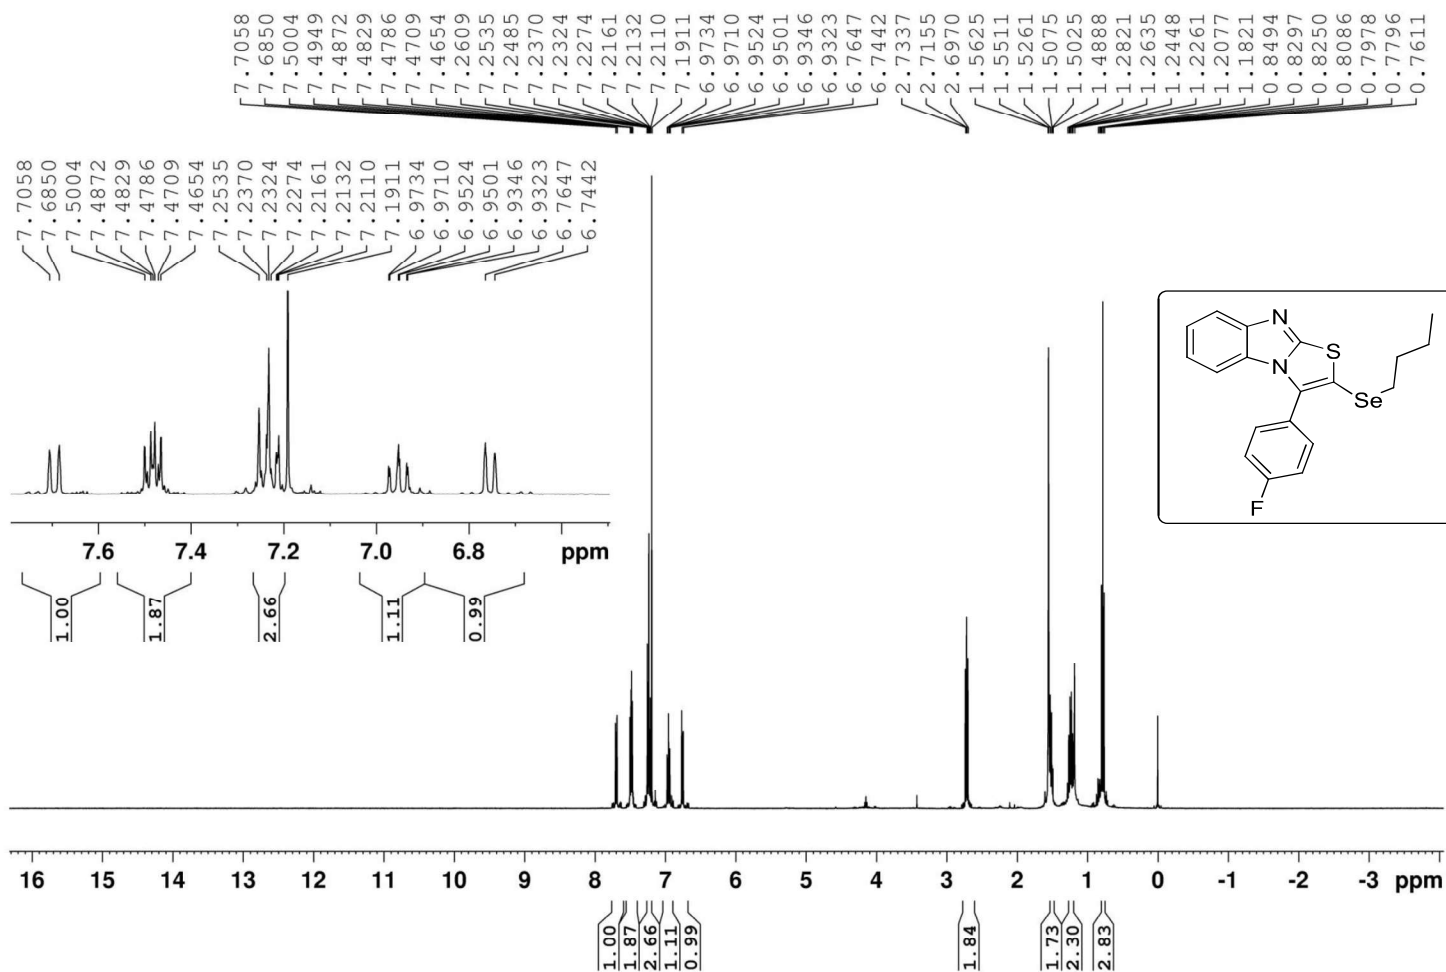

<sup>13</sup>C NMR spectra of 5c

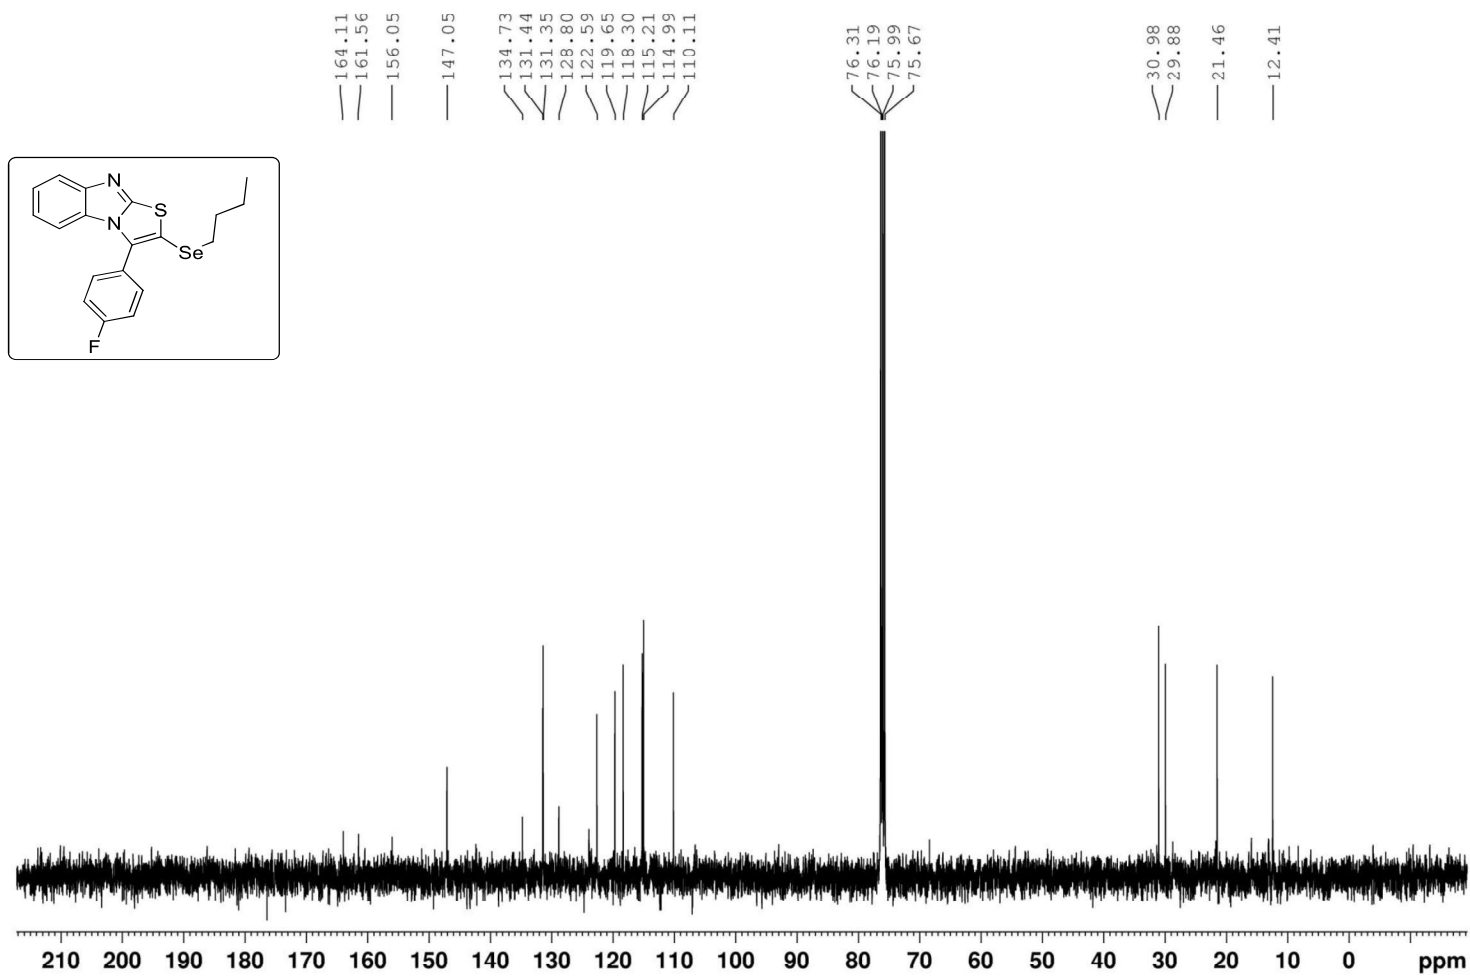

$^{19}\text{F}$  NMR spectra of 5c

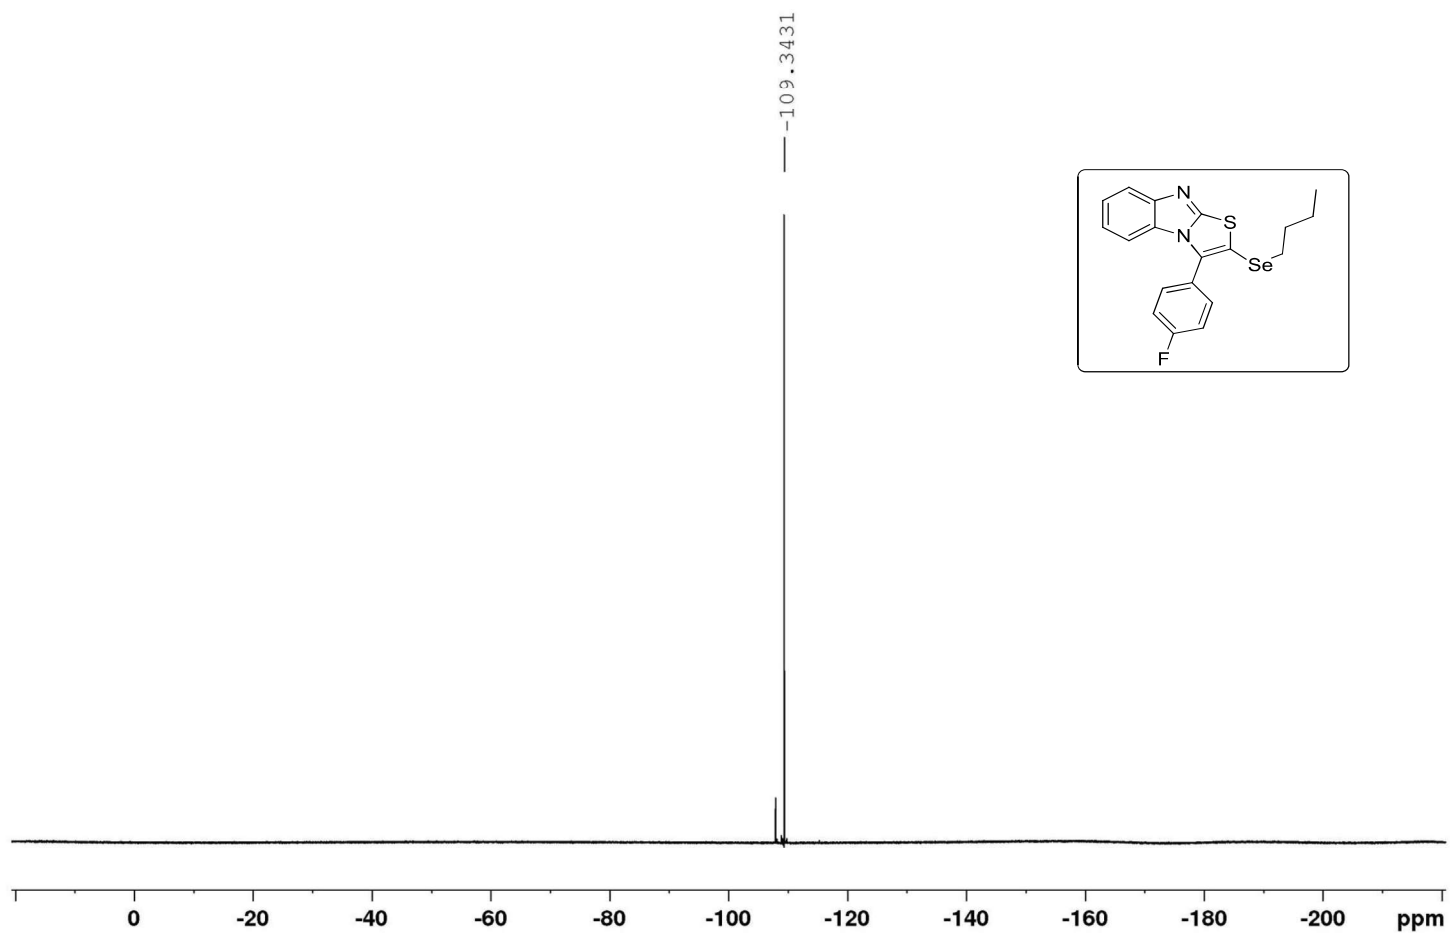

# <sup>1</sup>H NMR spectra of 5d

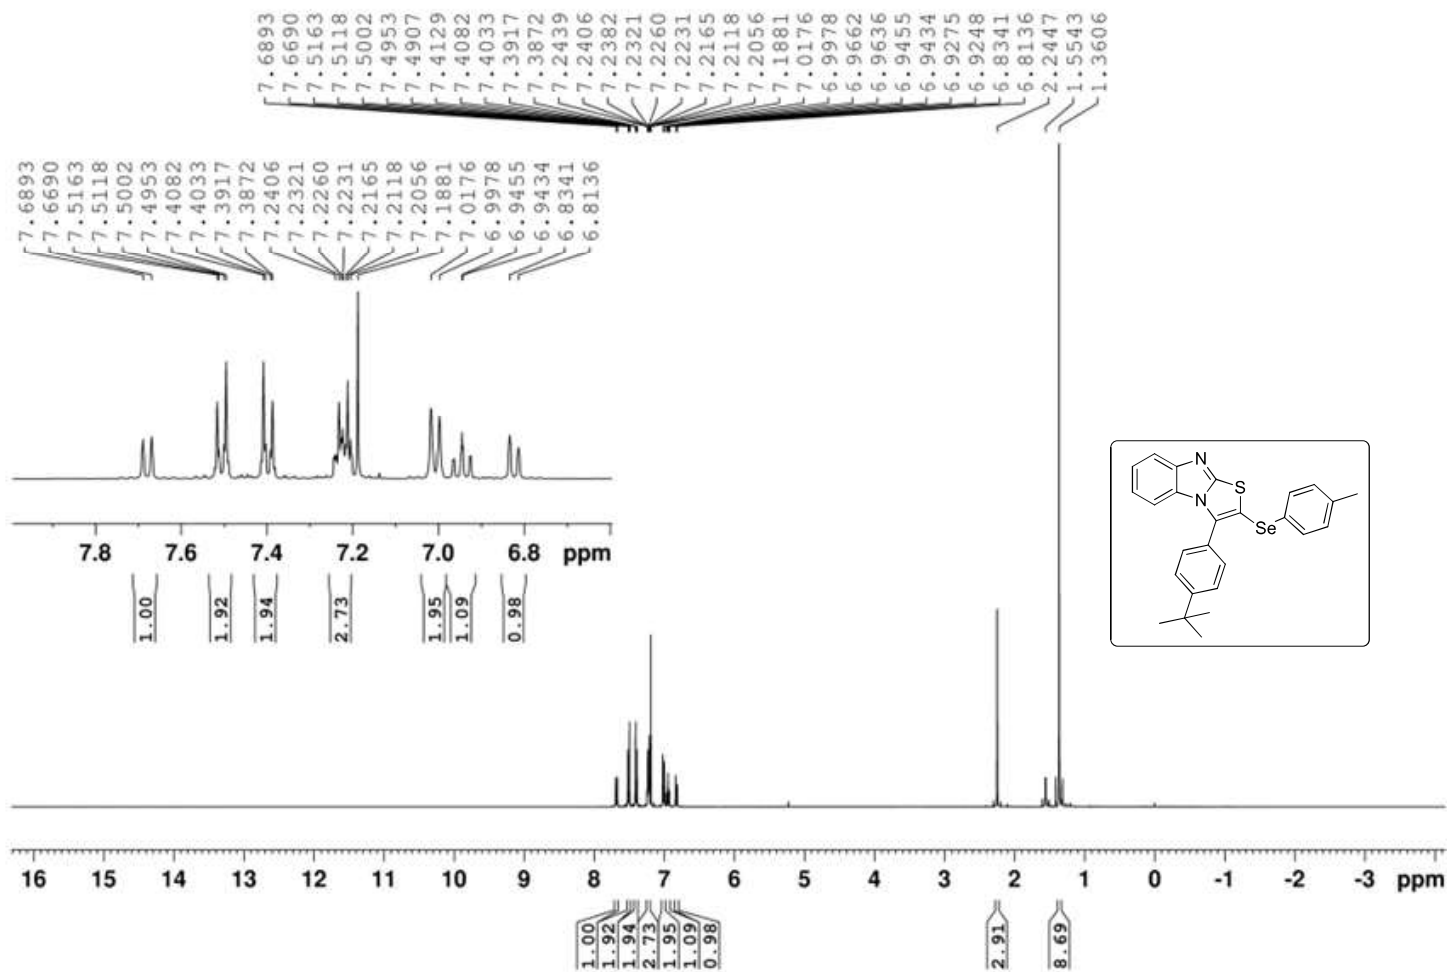

# <sup>13</sup>C NMR spectra of 5d

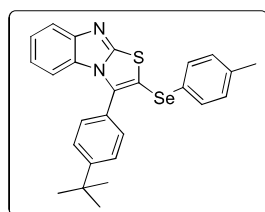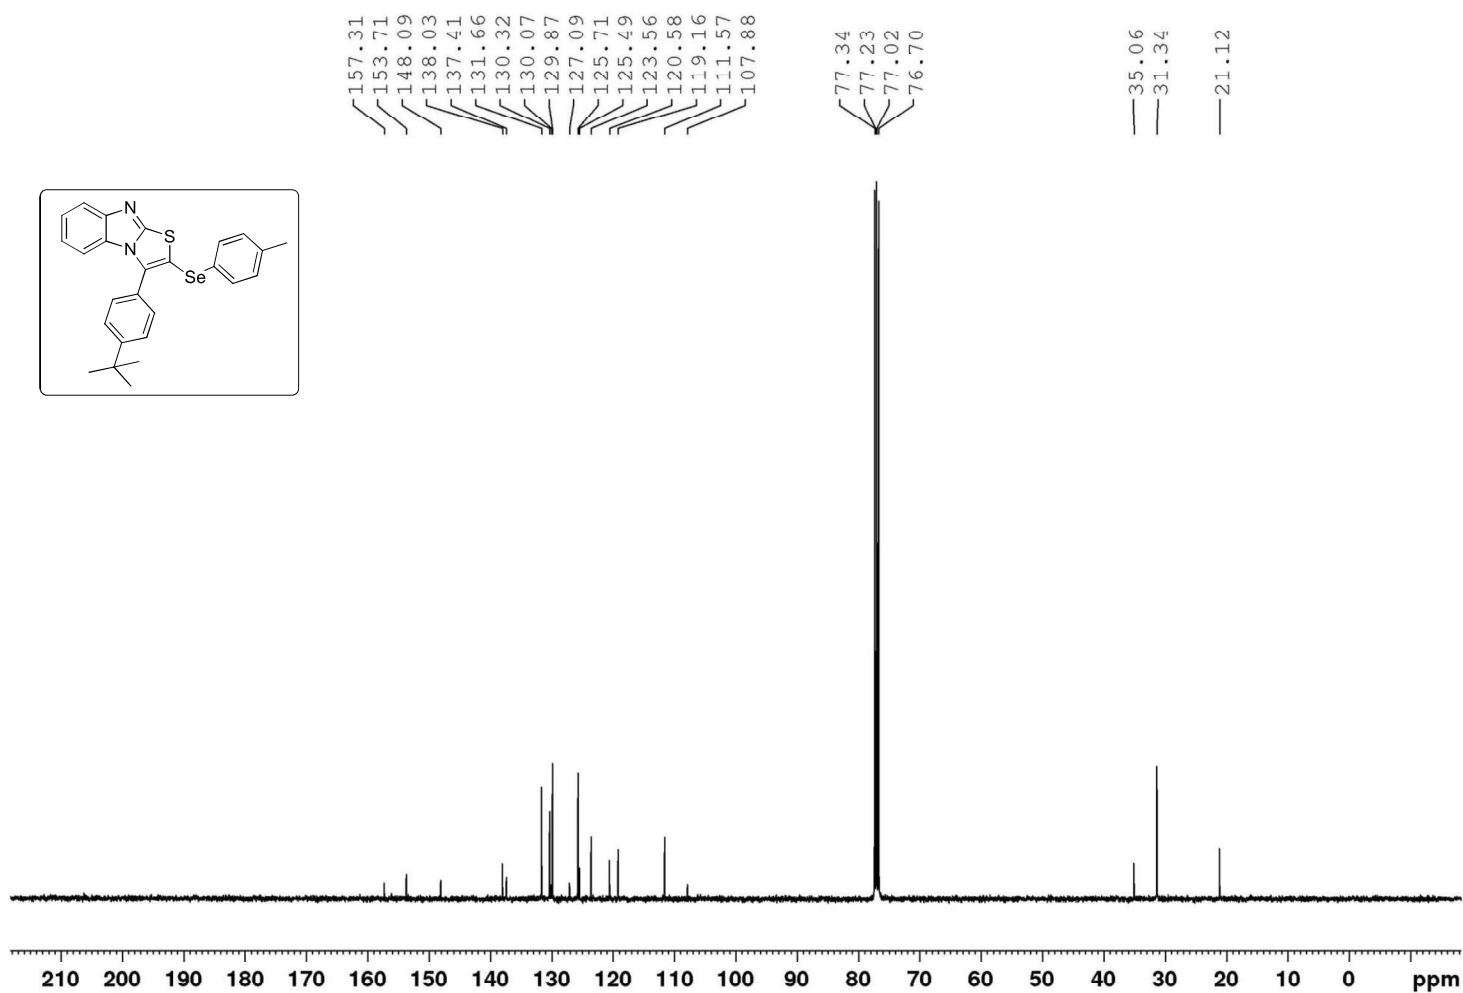

# <sup>1</sup>H NMR spectra of 5e

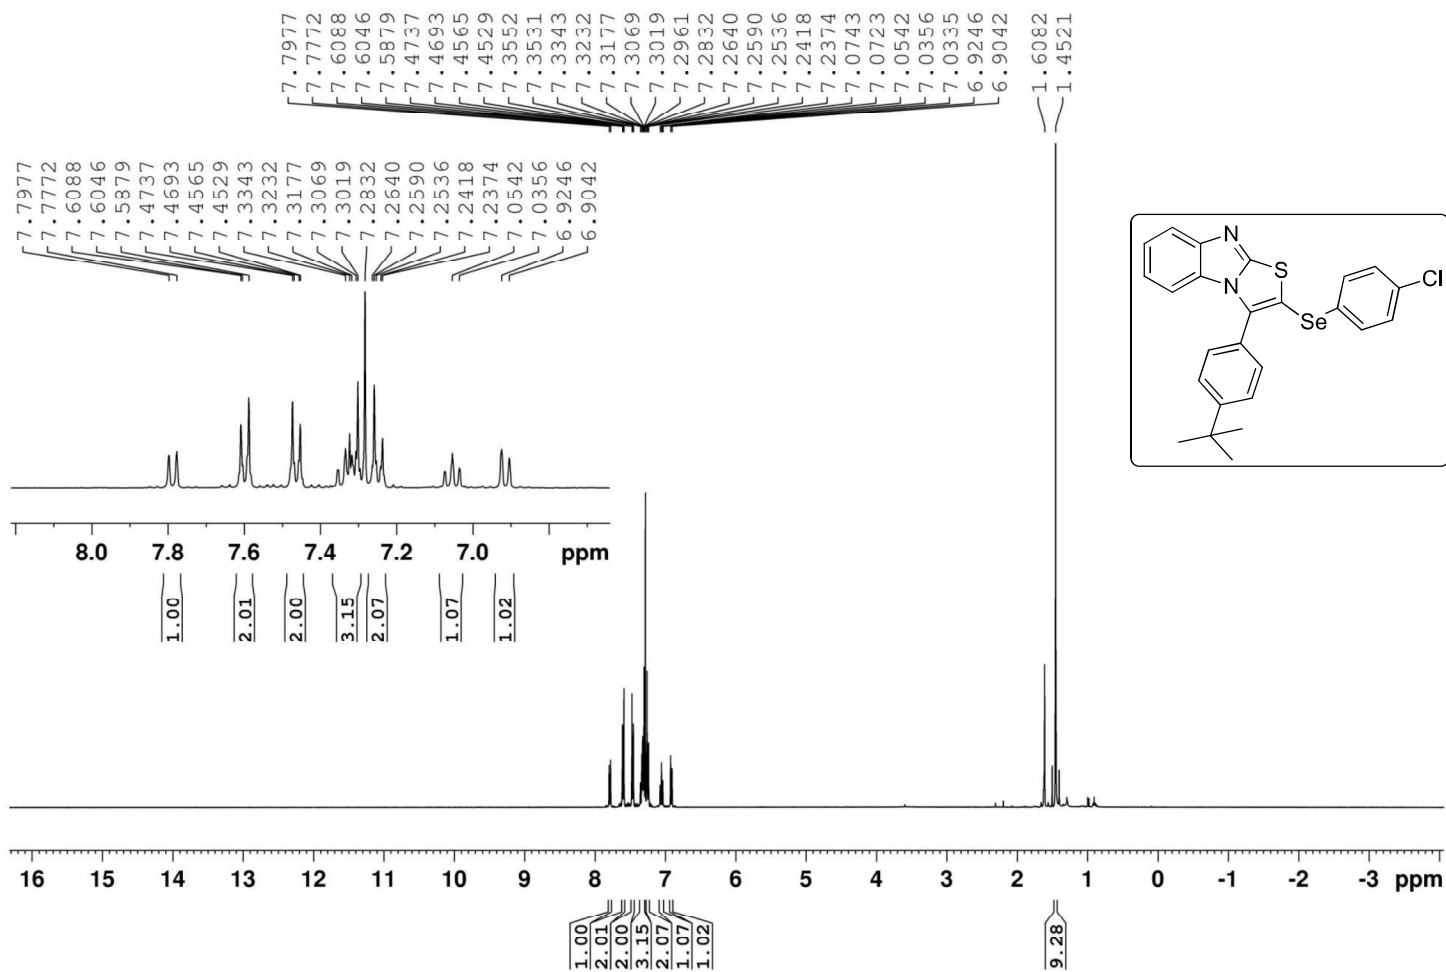



# <sup>13</sup>C NMR spectra of 5e

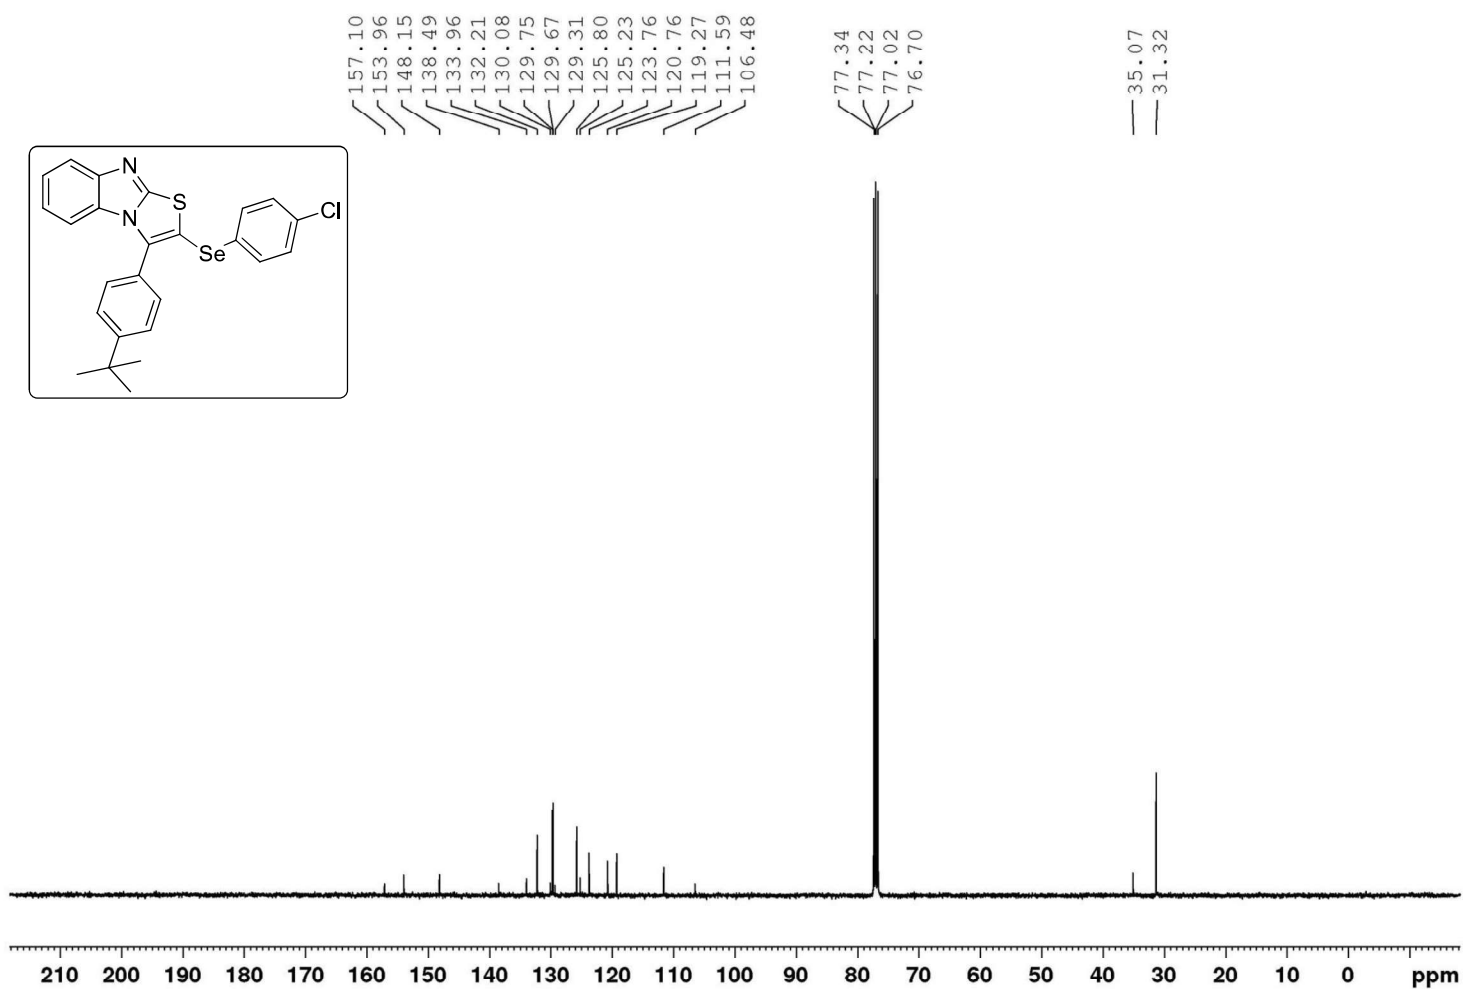

# <sup>1</sup>H NMR spectra of 5f

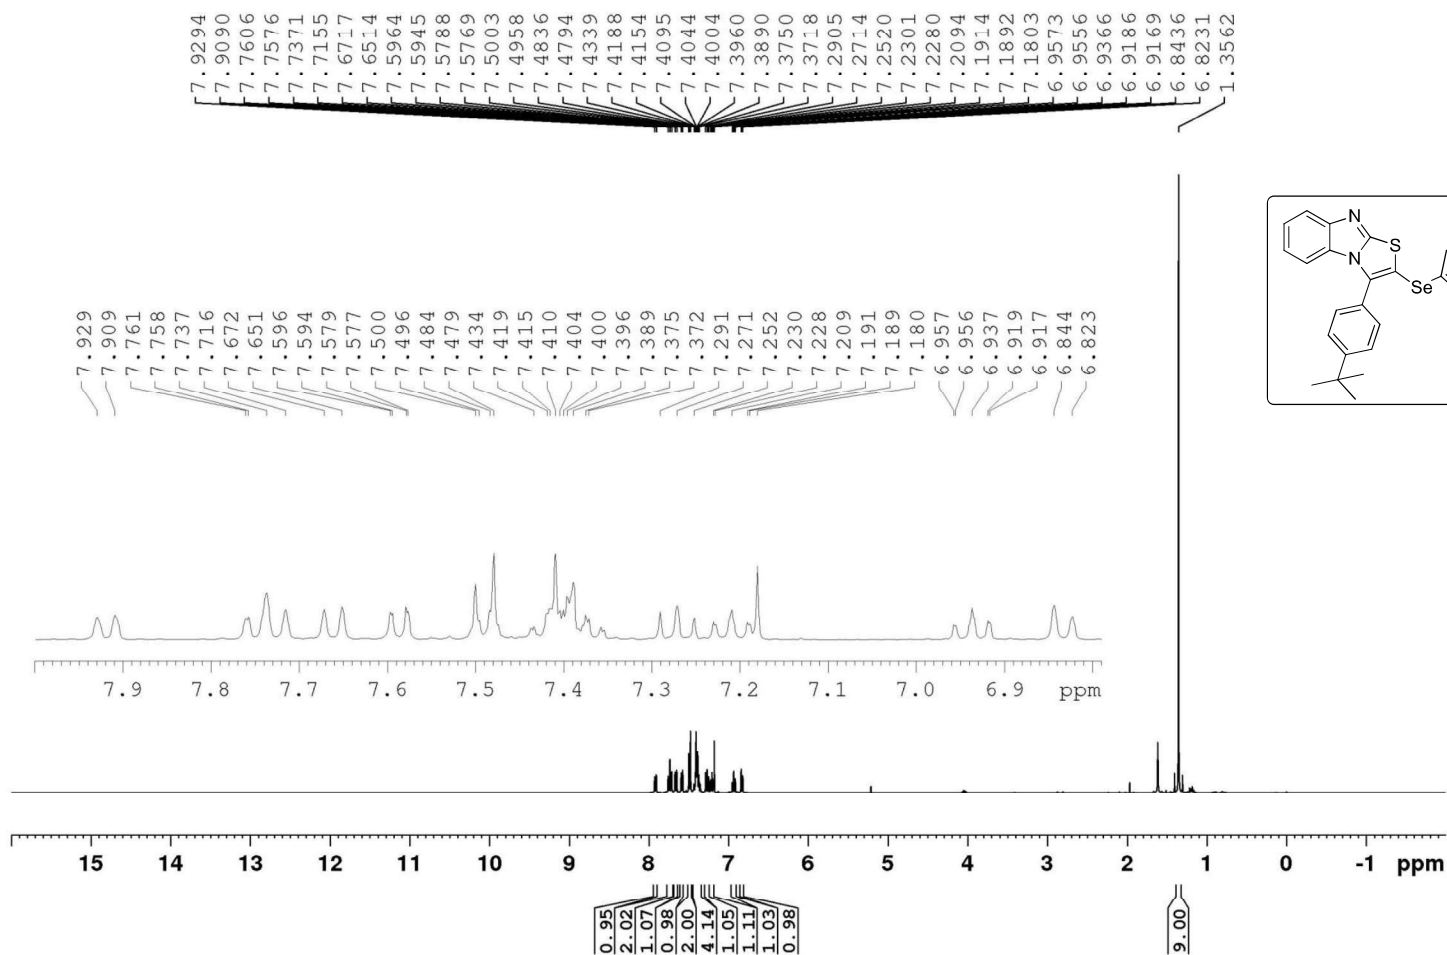

# <sup>13</sup>C NMR spectra of 5f

157.25  
153.81  
148.06  
137.70  
134.09  
133.06  
131.46  
130.04  
129.87  
129.72  
129.13  
128.68  
126.87  
126.55  
126.48  
126.00  
125.73  
125.46  
123.59  
120.61  
119.17  
111.57  
107.40  
77.35  
77.24  
77.03  
76.72

35.07  
31.35

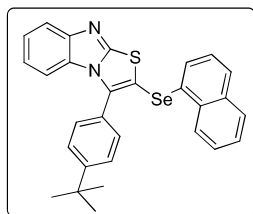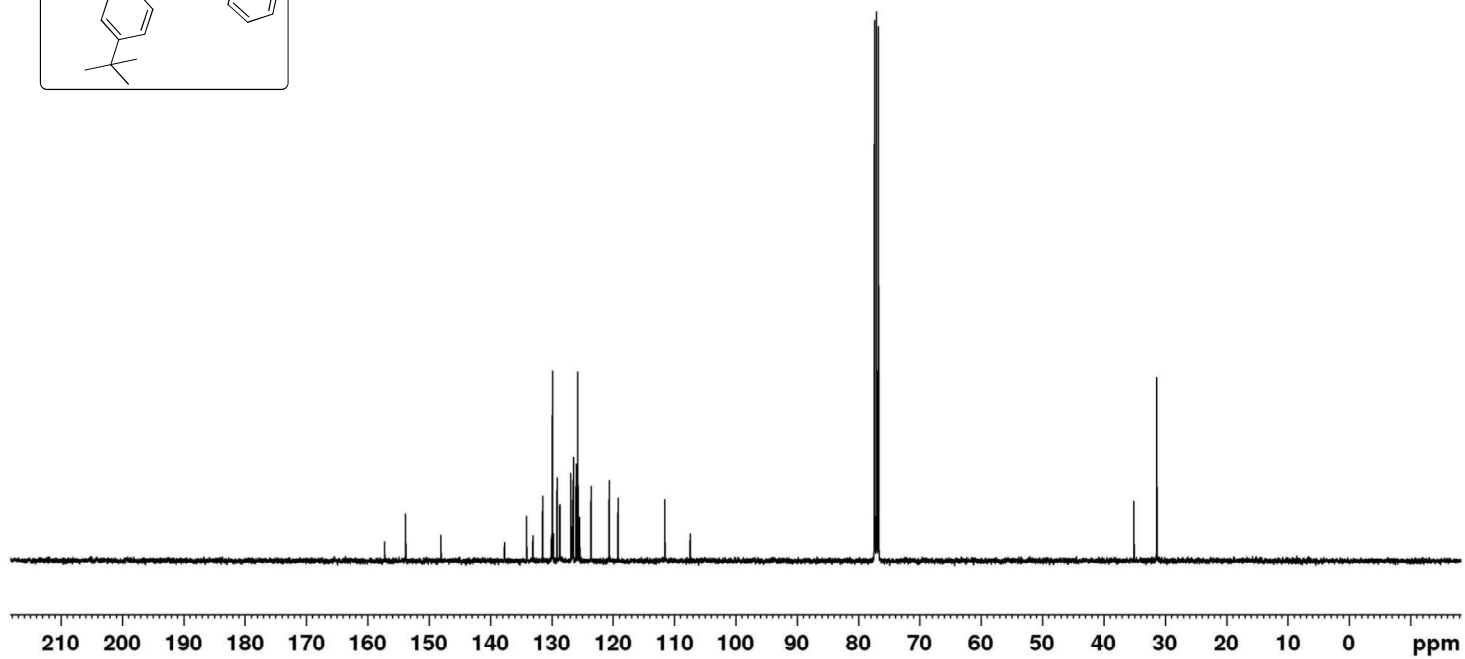

# <sup>1</sup>H NMR spectra of 5g

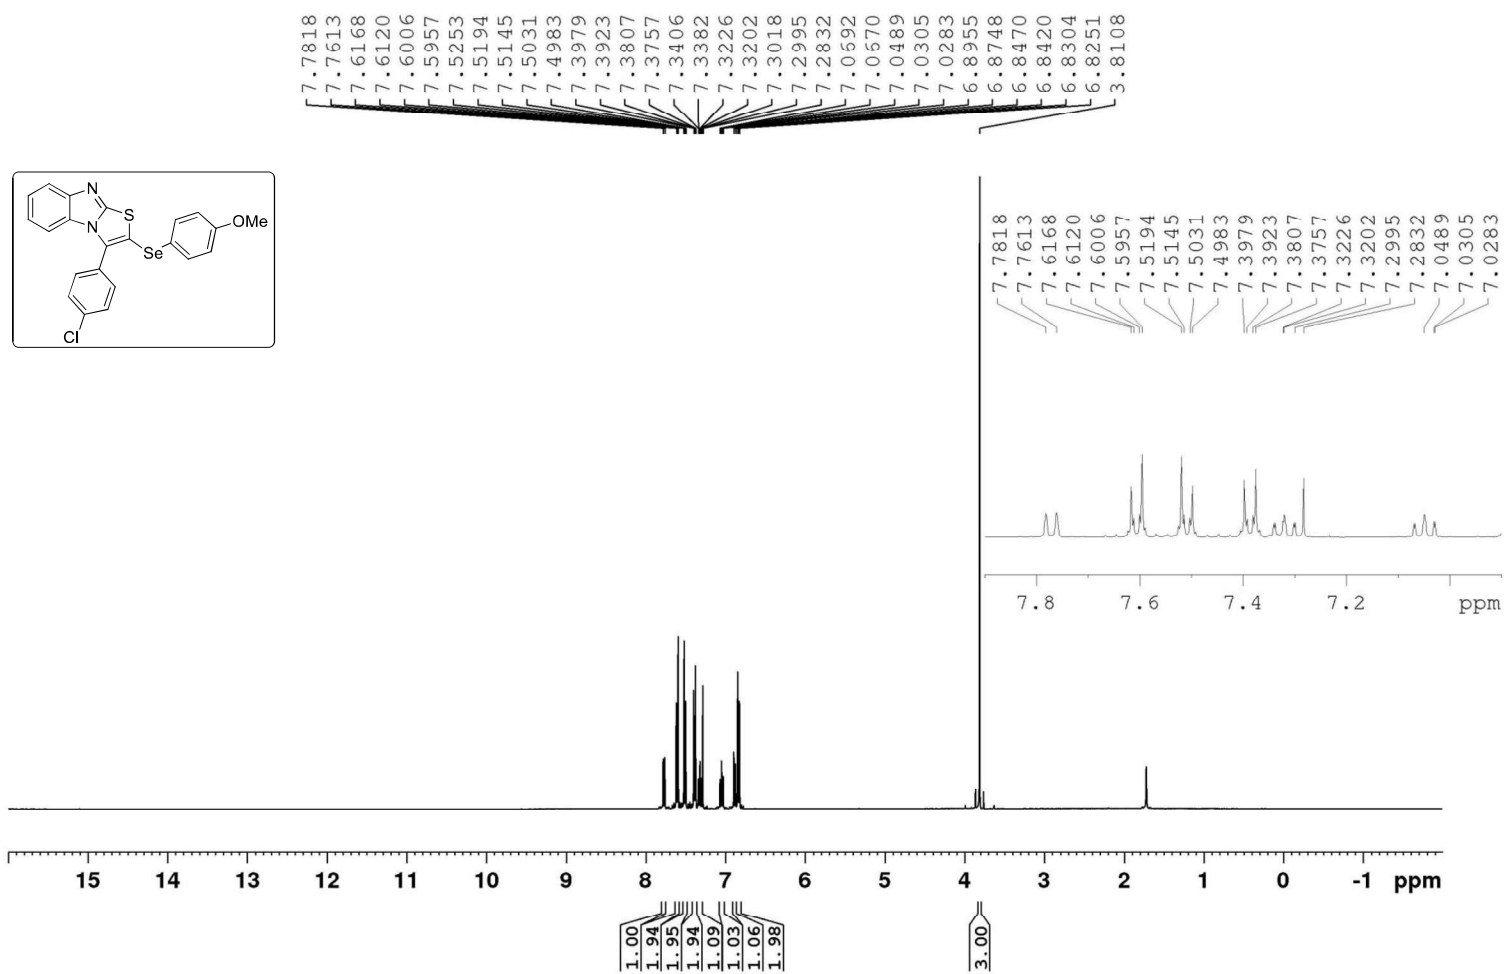

# <sup>13</sup>C NMR spectra of 5g

160.15  
156.96  
148.04  
136.58  
134.87  
134.70  
131.65  
129.82  
129.25  
127.16  
123.69  
120.77  
120.05  
119.37  
115.29  
111.19  
110.28  
77.34  
77.23  
77.02  
76.71  
55.37

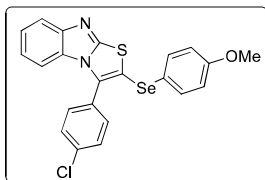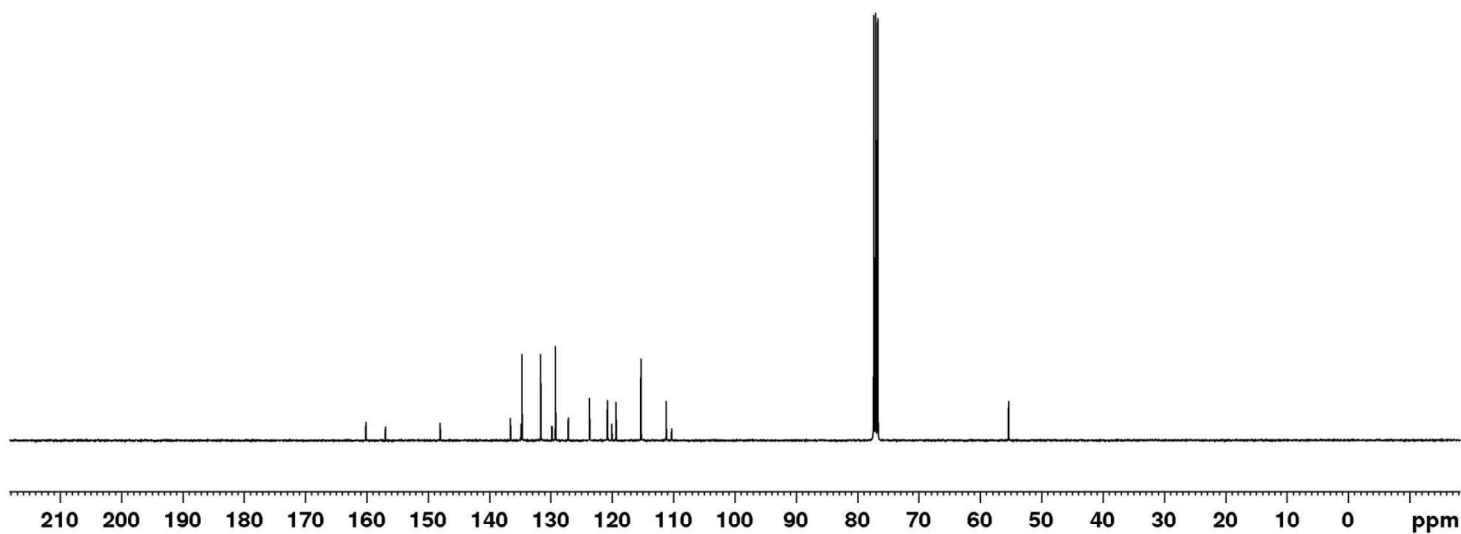

<sup>1</sup>H NMR spectra of 5h

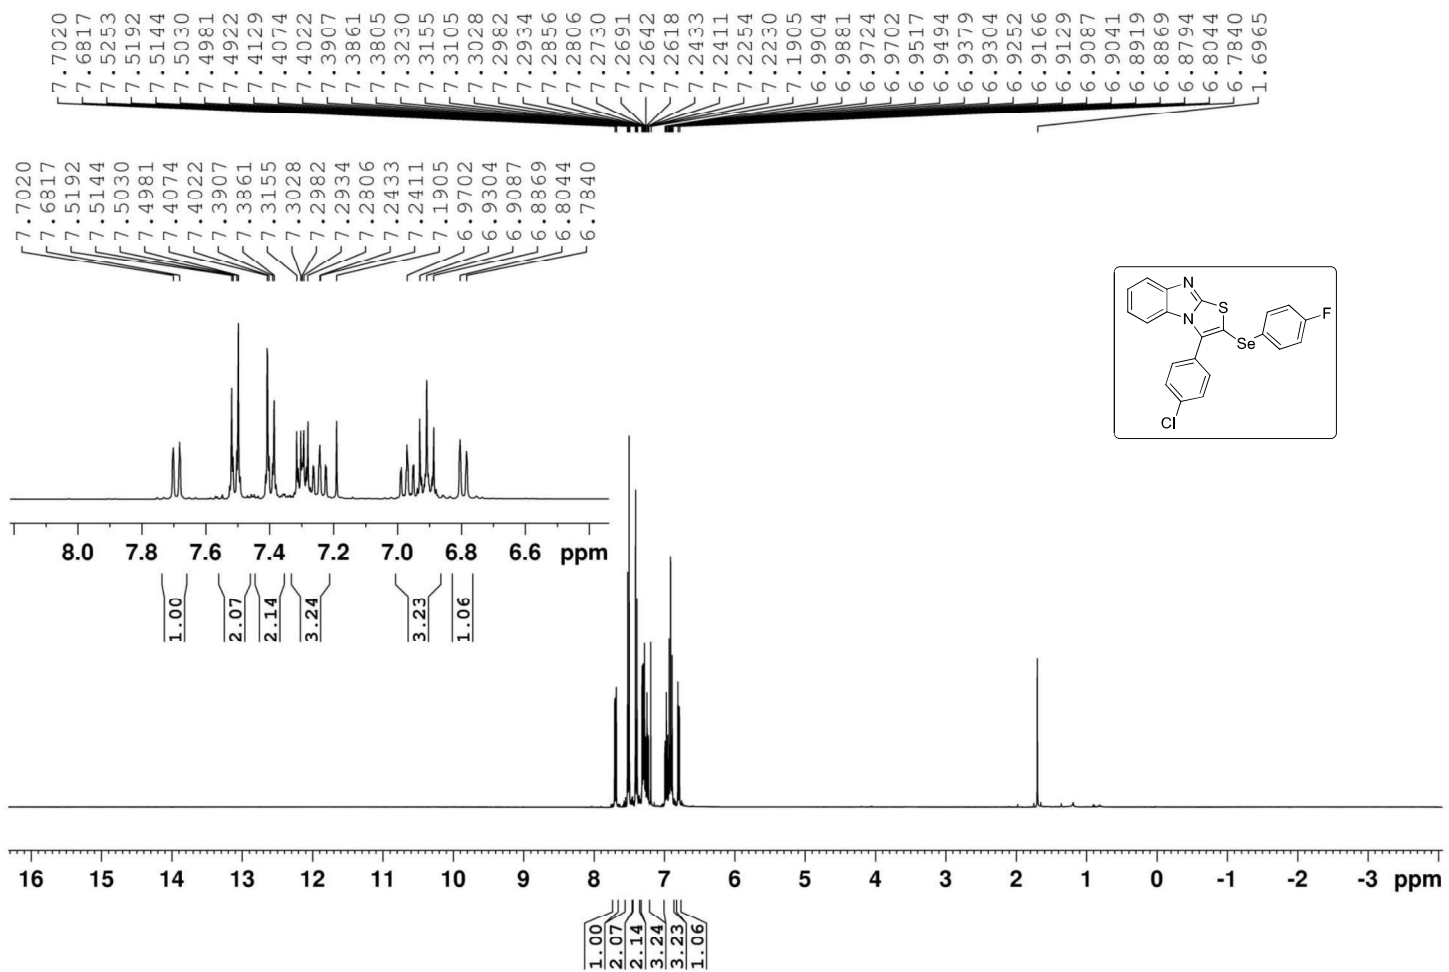

<sup>13</sup>C NMR spectra of 5h

164.03  
161.56  
156.86  
148.08  
136.79  
136.19  
134.00  
133.93  
131.54  
129.83  
129.32  
126.89  
124.97  
124.94  
123.89  
120.94  
119.46  
117.00  
116.79  
111.25  
108.66  
77.37  
77.05  
76.73

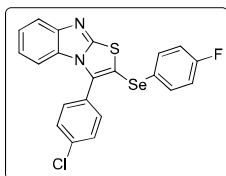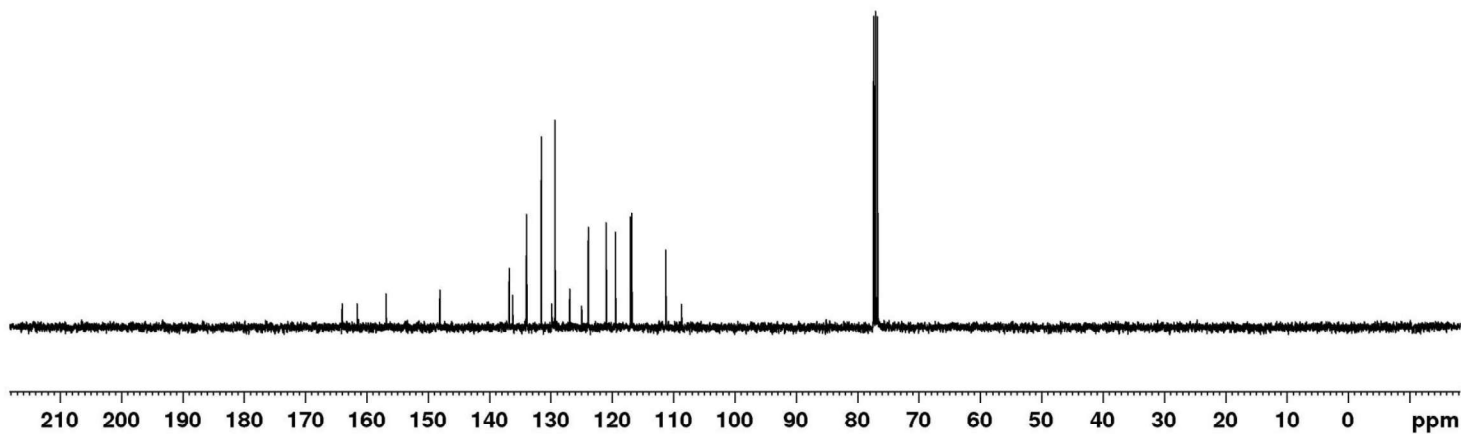

<sup>19</sup>F NMR spectra of 5h

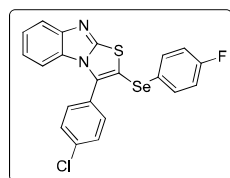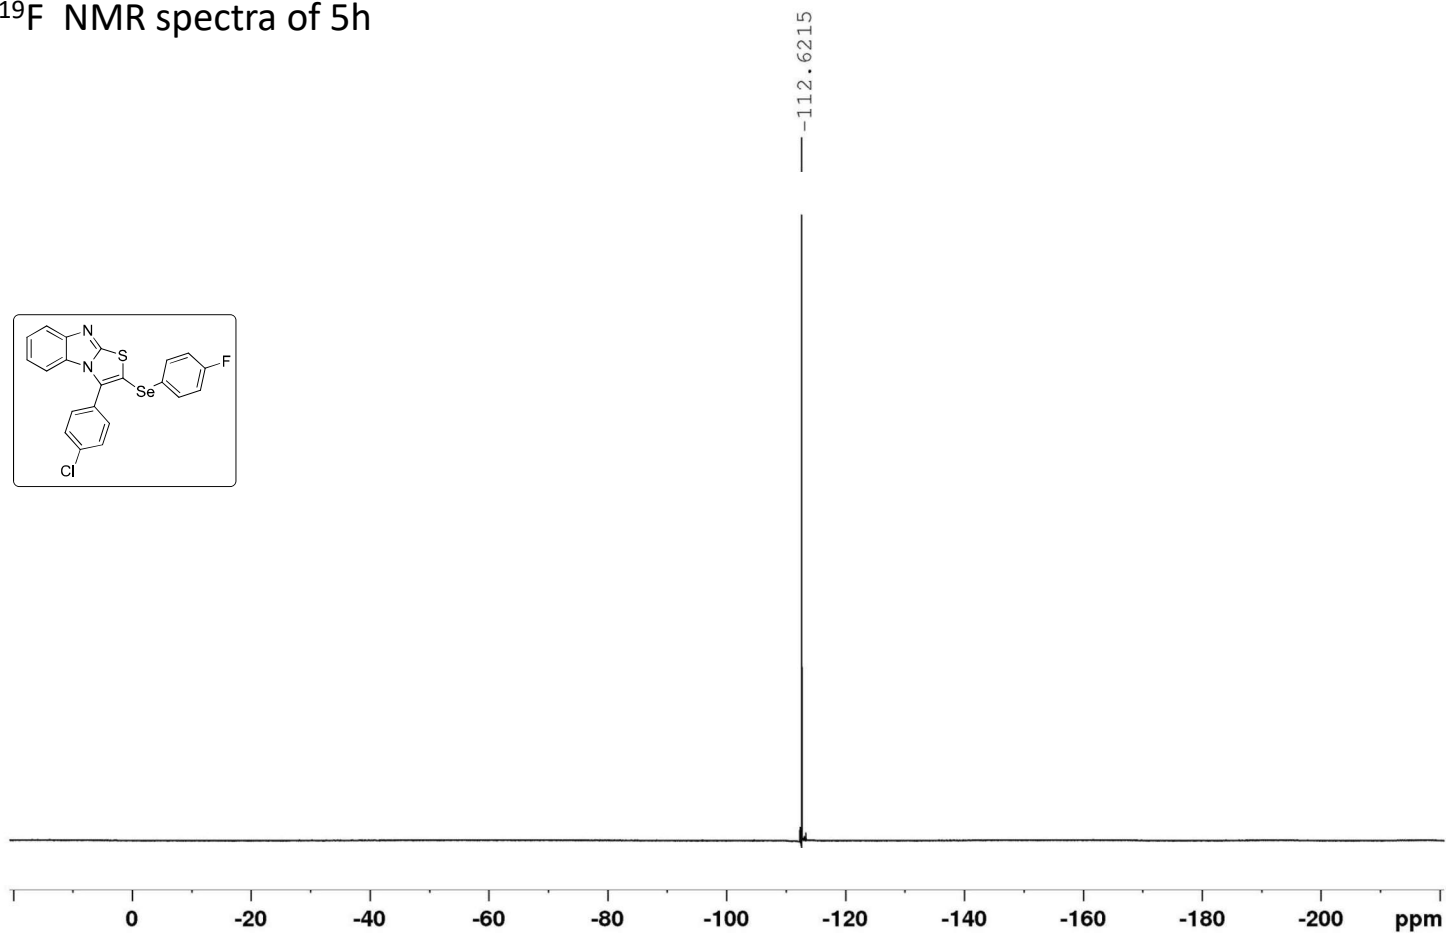



<sup>1</sup>H NMR spectra of 5i

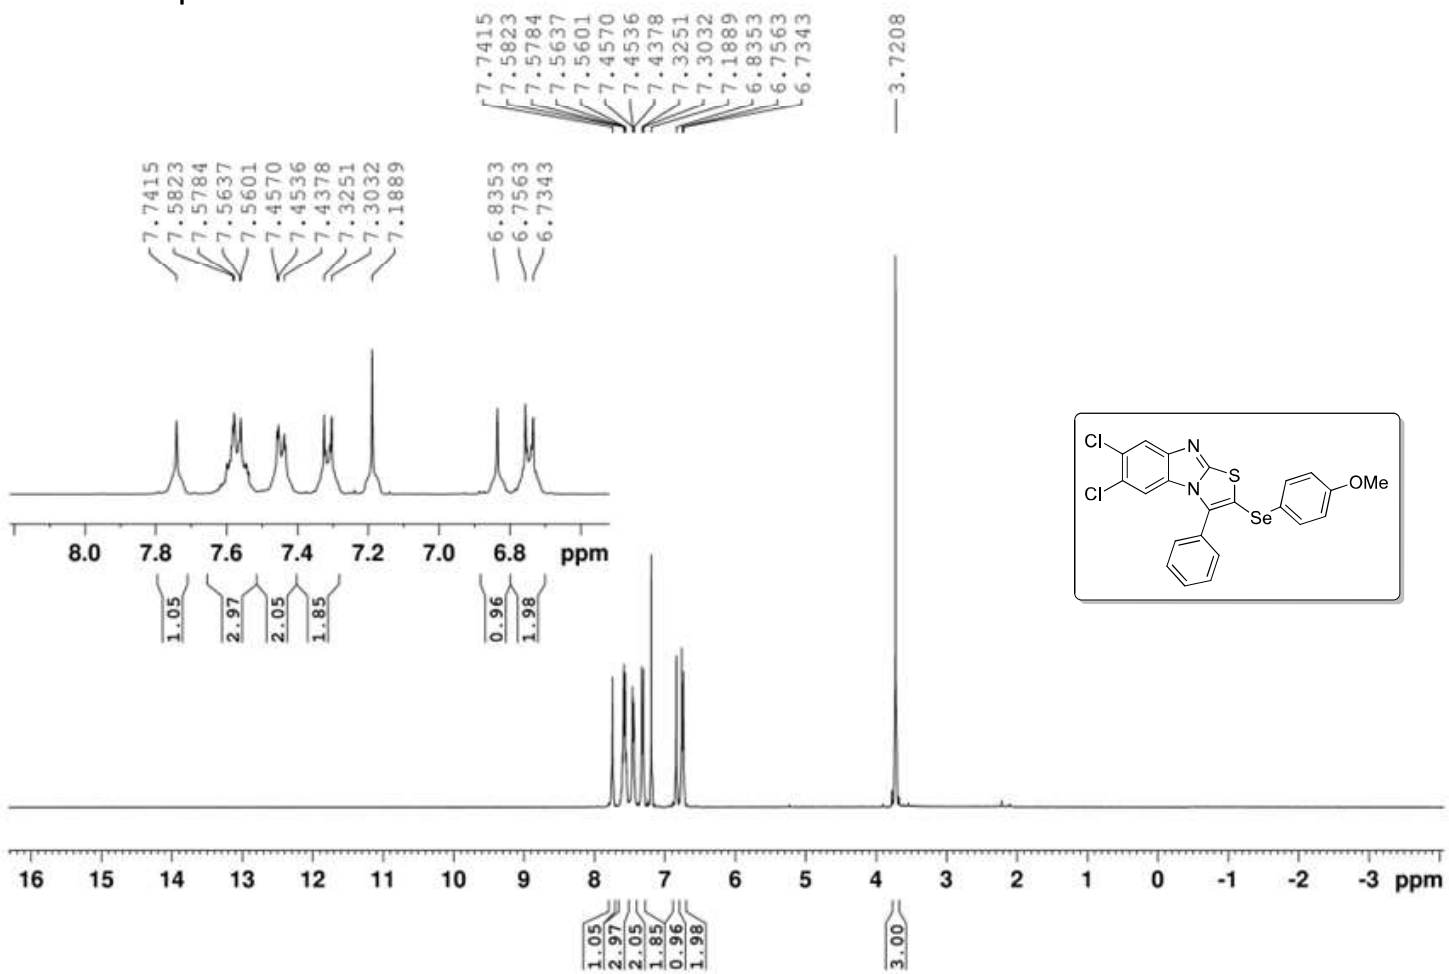

<sup>13</sup>C NMR spectra of 5i

- 160.31
- 158.87
- 147.11
- 135.26
- 130.83
- 130.10
- 129.18
- 128.73
- 127.99
- 127.67
- 124.44
- 120.15
- 119.56
- 115.30
- 112.56
- 111.33
- 77.33
- 77.01
- 76.70
- 55.37

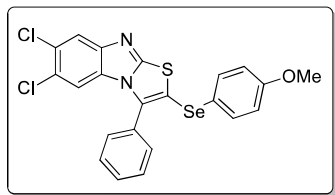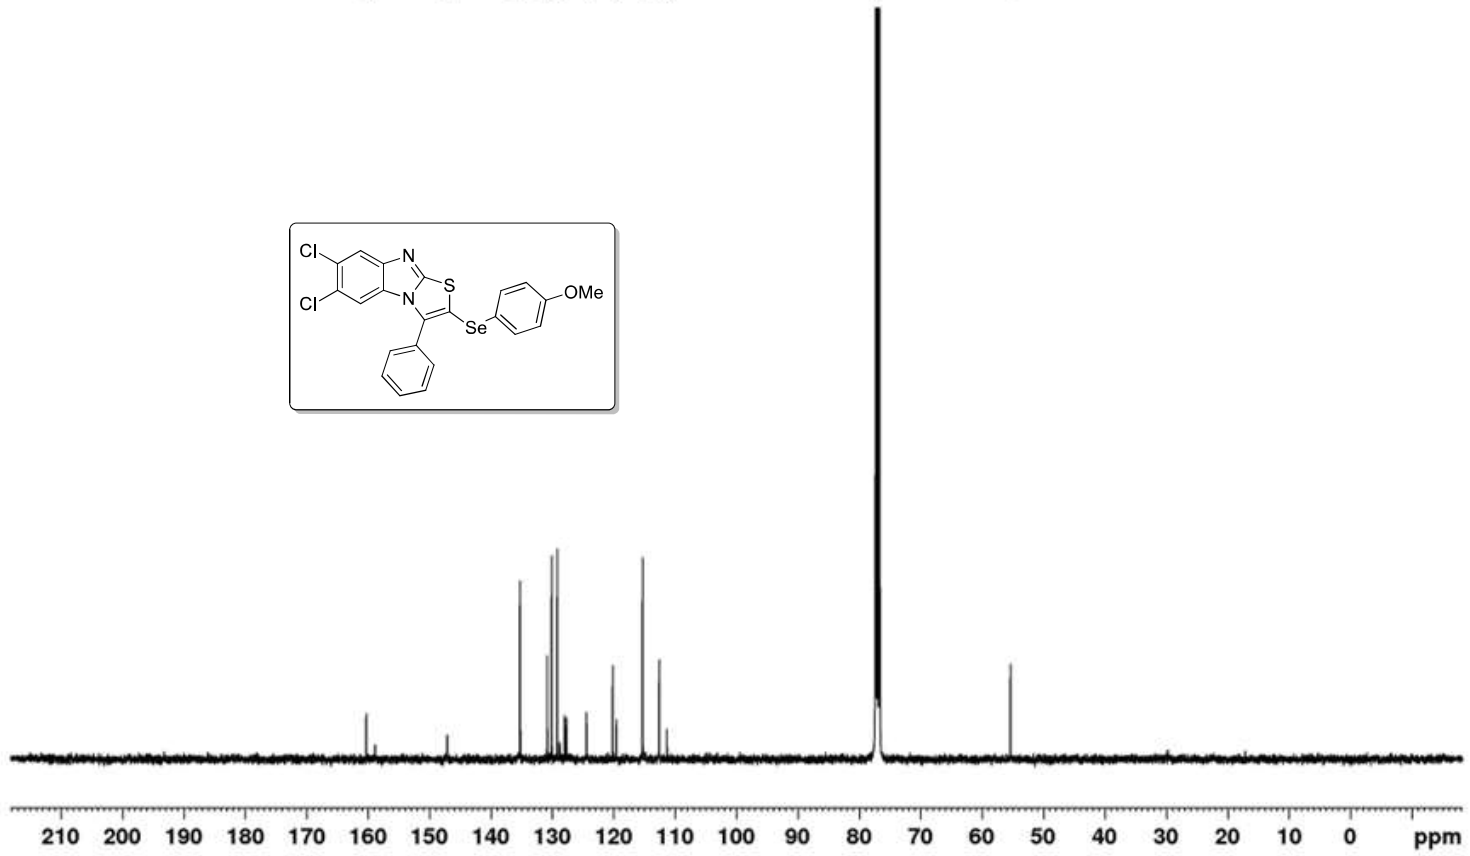

<sup>1</sup>H NMR spectra of 5j

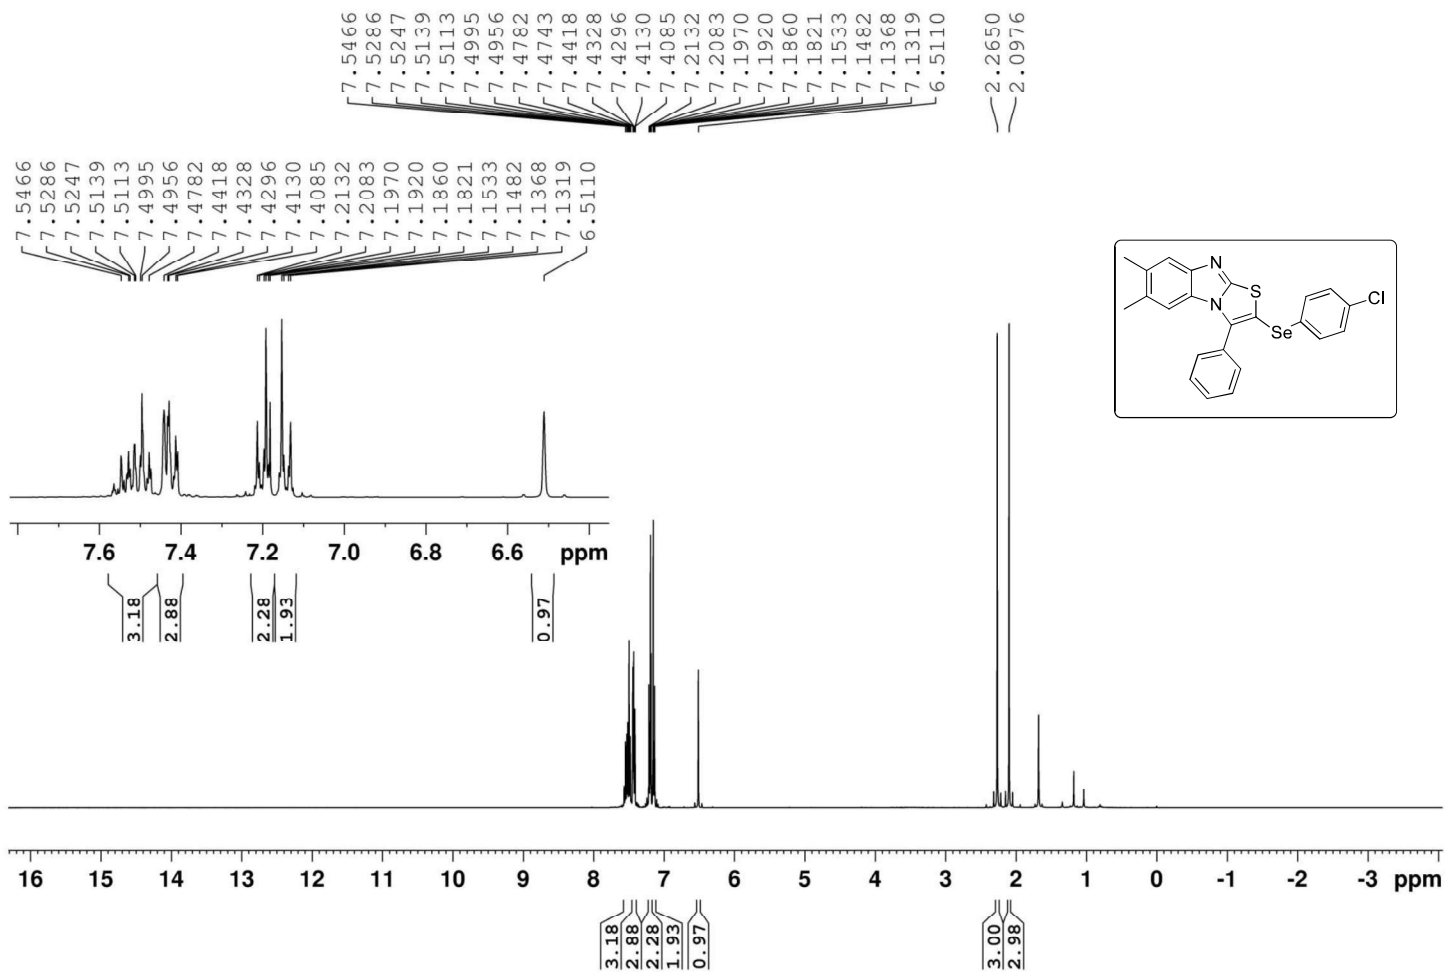

# <sup>13</sup>C NMR spectra of 5j

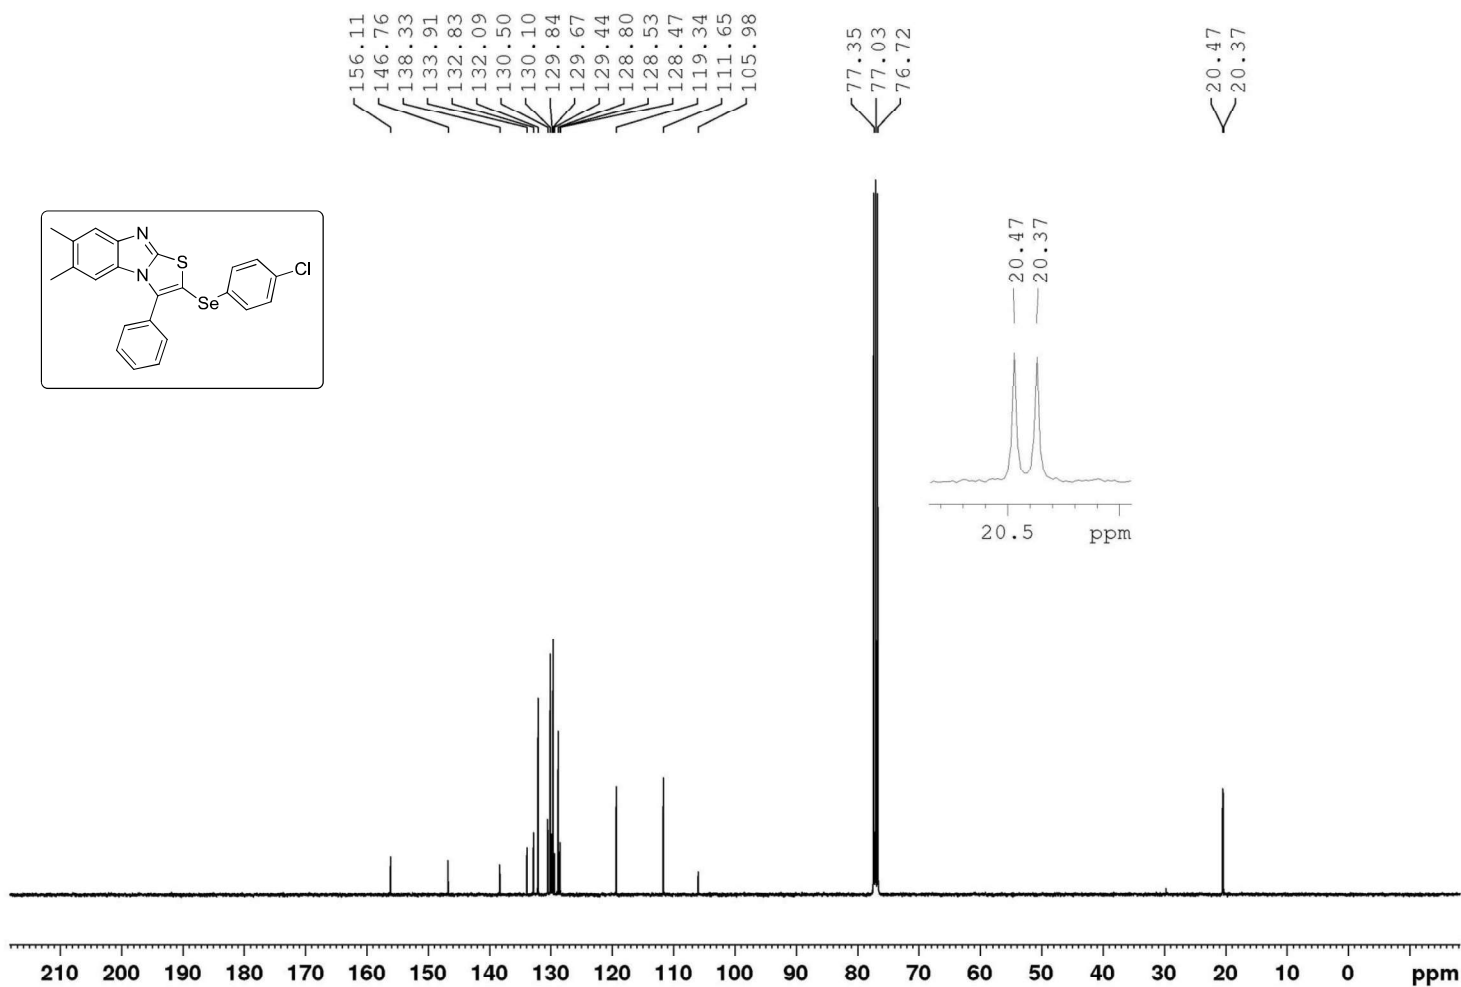

<sup>1</sup>H NMR spectra of 5k

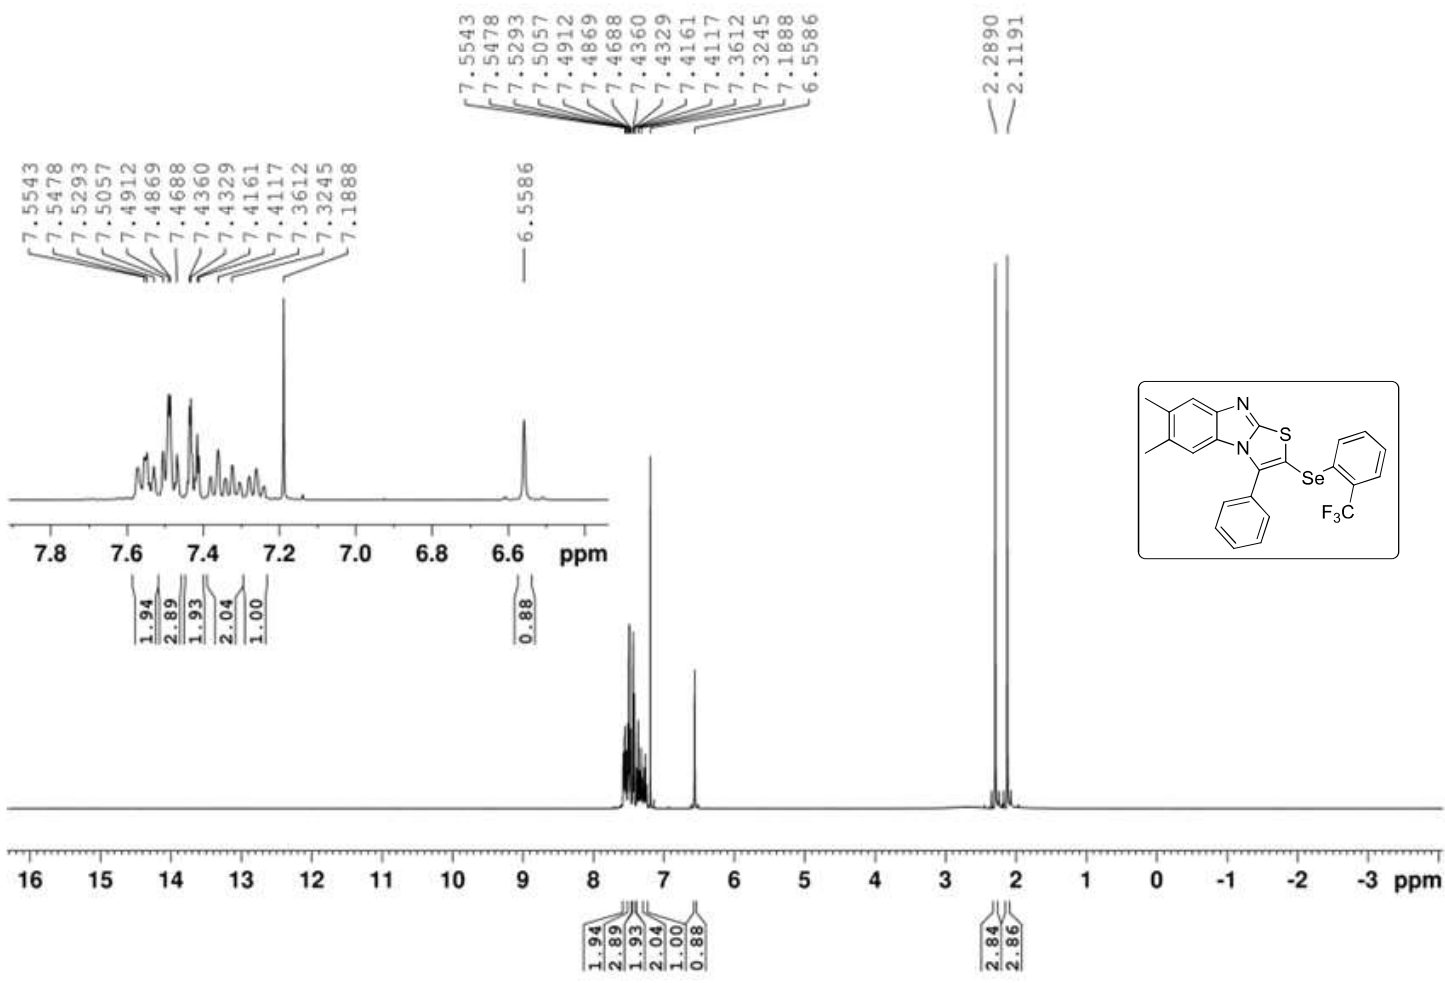

<sup>13</sup>C NMR spectra of 5k

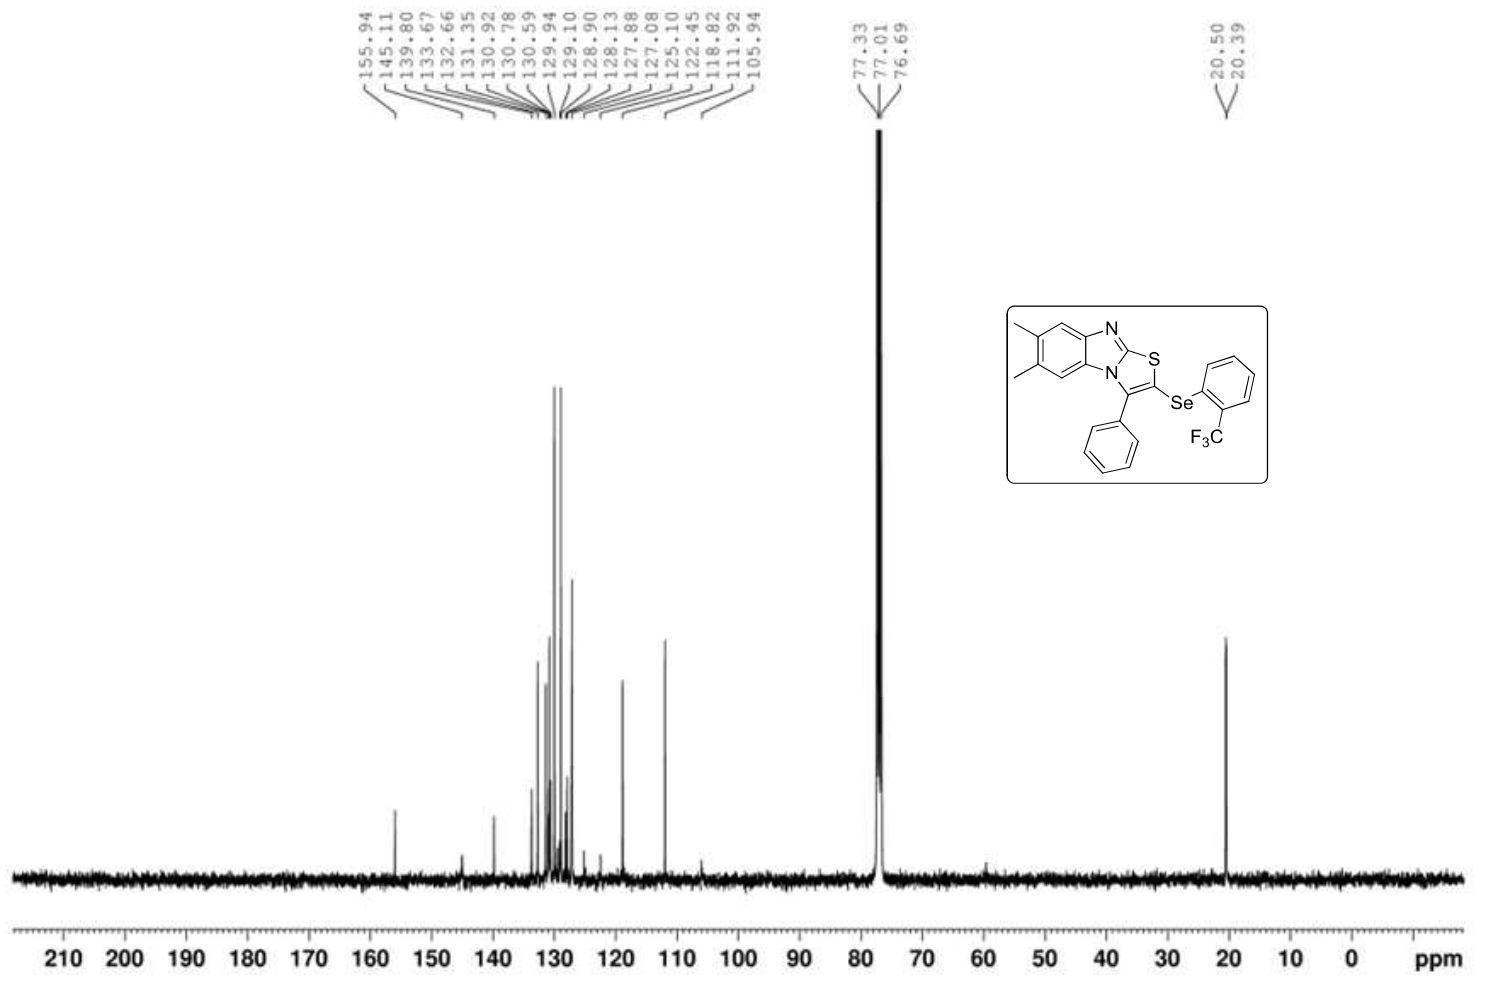

<sup>19</sup>F NMR spectra of 5k

— -60.7915

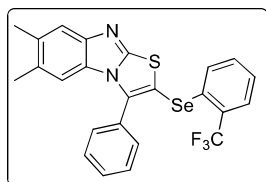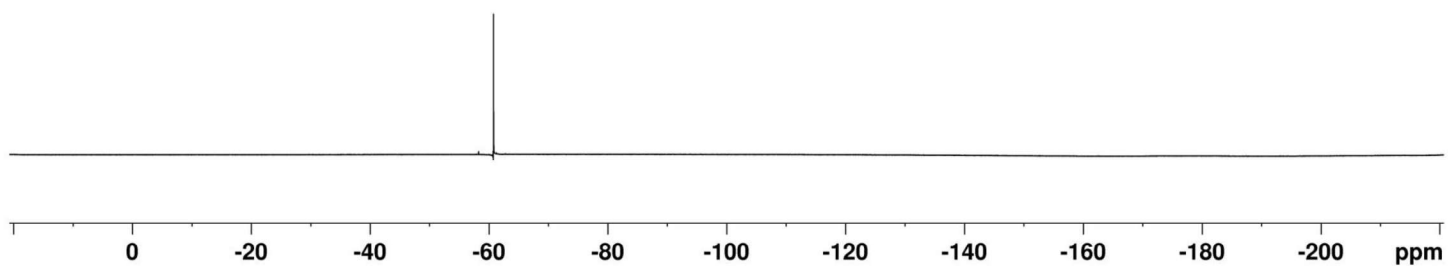

<sup>1</sup>H NMR spectra of 6

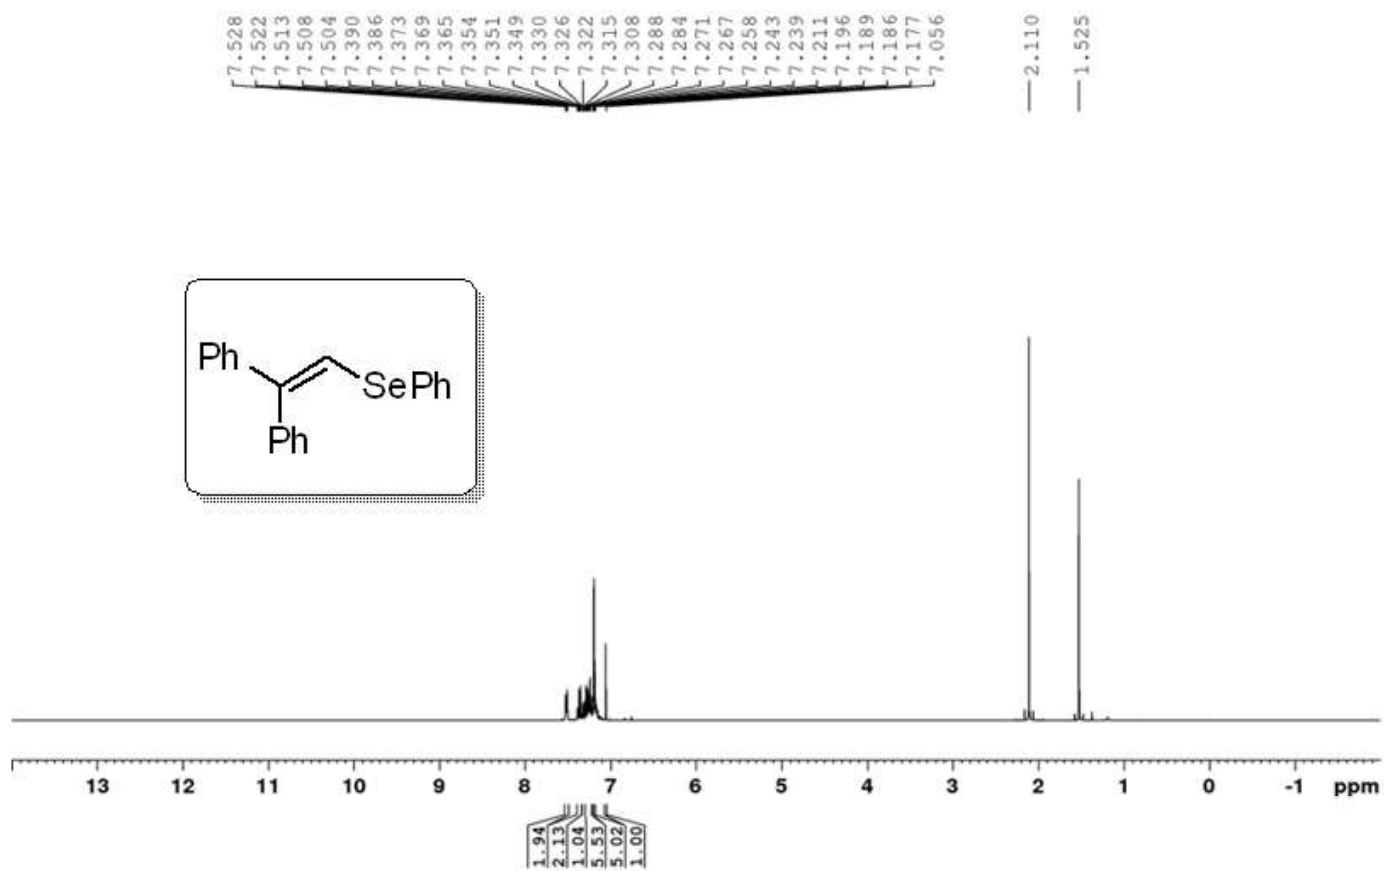



$^{13}\text{C}$  NMR spectra of 6

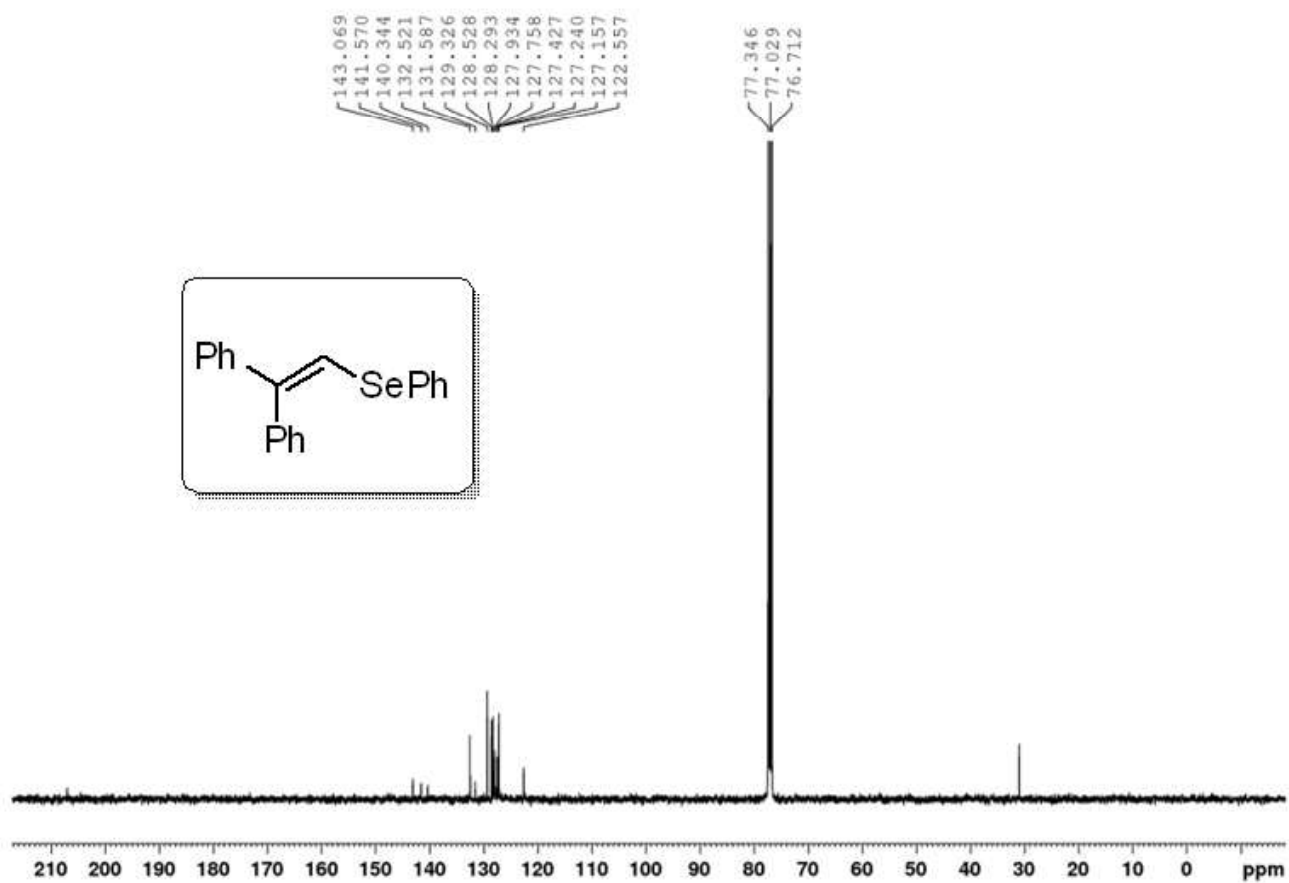

Supplement: d4ra00057a1.pdf [file d4ra00057a1.pdf]
